# Supplementary material for: The intramolecular Baylis–Hillman reaction: easy preparation of versatile substrates, facile reactions, and synthetic applications
Source: Royal Society of Chemistry journal article supplement (doi:10.1039/b311951c), 2004-01-01

The Intramolecular Baylis-Hillman Reaction: Easy Preparation of Versatile Substrates, Facile Reactions, and Synthetic Applications.

**Jung Eun Yeo, Xiuling Yang, Hee Jin Kim, and Sangho Koo***

*Department of Chemistry, Myong Ji University, Yongin, Kyunggi-Do, 449-728, Korea*

Fax: +82 31 335 7248

E-mail: sangkoo@mju.ac.kr

**Experimental Section**

**General Experimental.** 1H (300 MHz) and 13C NMR (75.5 MHz) spectra were recorded in CDCl3 with Me4Si ( = 0 ppm) as an internal standard. Solvents for extraction and chromatography were reagent grade and used as received. Column chromatography was performed by the method of Still using silica gel 60, 230400 mesh ASTM supplied by Merck. Solvents used as reaction media were dried over pre-dried molecular sieve (5 Å) by microwave oven. All reactions were performed under dry argon in oven-dried glassware, except for those reactions with H2O as a solvent, which were run in air.

**General Procedure for ’-Acetoxylation: 6-Acetoxy-2-cyclohexene-1-one (1a)** [Rubottom, G. M.; Gruber, J. M*. J. Org. Chem.* **1978**, *43*, 1599]**.** To a stirred solution of 2-cyclohexene-1-one (3.06 g, 30.00 mmol) in toluene (60 mL) was added Pb(OAc)4 (28.00 g, 60.00 mmol). The mixture was then heated to reflux for 4 h, and cooled to rt. The resulting mixture was diluted with ether, washed with 1 M HCl, dried over anhyd Na2SO4, filtered, and concentrated under reduced pressure. The crude product was purified by SiO2 flash chromatography to give acetate **1a** (3.94 g, 25.55 mmol) in 85% yield.

**7-Acetoxy-2-cycloheptene-1-one (1f)** [Floresca, R.; Kurihara, M.; Watt, D. S. *J. Org. Chem.* **1993**, *58*, 2196]**.** Following the above general procedure, the reaction of 2-cycloheptene-1-one (0.46 mL, 3.30 mmol) and Pb(OAc)4 (2.97 g, 6.60 mmol) in refluxing toluene (30 mL) for 9.5 h gave acetate **1f** (0.54 g, 3.21 mmol) in 97% yield.

**6-Acetoxycyclohexane-1-one (6)** [Creary, X. *J. Org. Chem*. **1979**, *44*, 3938]**.** Following the above general procedure, the reaction of cyclohexanone (3.12 mL, 30.00 mmol) and Pb(OAc)4 (16.8 g, 36.00 mmol) in refluxing toluene (65 mL) for 50 min gave acetate **6** (4.24 g, 27.20 mmol) in 91% yield.

**General Procedure for the 1,2-Addition of Hydride: 3-Cyclohexene-1,2-diol (2a)** [Takano, S.; Yoshimitsu, T.; Ogasawara, K. *J. Org. Chem.* **1994**, *59*, 54; Ross, A. M.; Pohl, T. M.; Piazza, K.; Thomas, M.; Fox, B.; Whalen, D. L. *J. Am. Chem. Soc.* **1982**, *104*, 1658]**.** To a stirred solution of 6-acetoxy-2-cyclohexene-1-one (**1a**) (2.62 g, 16.99 mmol) in MeOH (25 mL) was added NaBH4 (0.33 g, 8.49 mmol) at 0 ºC. The mixture was stirred vigorously at 0 ºC for 1 h, and 1 M aq solution of NaOH (25 mL) was added. The resulting mixture was stirred for 4 h at rt, and then diluted with ethyl acetate, washed with H2O, dried over anhyd K2CO3, filtered, and concentrated under reduced pressure. The crude product (1.76 g, 15.40 mmol) was purified by SiO2 flash chromatography to give diol **2a** (1.57 g, 13.76 mmol, a 1:1 mixture of diastereomers) in 81% yield.

**3-Cycloheptene-1,2-diol (2f)** [Sanfilippo, C.; Nicolosi, G. *Tetrahedron: Asymmetry* **2002**, *13*, 1889]**.** Following the above general procedure, the reaction of 7-acetoxy-2-cycloheptene-1-one (**1f**) (0.52 g, 3.14 mmol) and NaBH4 (0.06 g, 1.57 mmol) in MeOH (30 mL) at 0 ºC for 1 h, followed by treatment with 1 M aq solution ofNaOH (35 mL) for 4 h at rt produced diol **2f** (0.38 g, 3.00 mmol, a 1:1 mixture of diastereomers) in 96% yield.

**General Procedure for the 1,2-Addition of Other Nucleophile (method A): 2-Phenyl-3-cyclohexene-1,2-diol (2b).** To a stirred solution of 6-acetoxy-2-cyclohexene-1-one (**1a**) (0.58 g, 3.76 mmol) in THF (30 mL) was added 1.9 M cyclohexane/ether solution of PhLi (5.94 mL, 11.28 mmol) at –78 ºC. The reaction mixture was stirred at that temperature for 1 h and then at rt for 2 h. The mixture was diluted with ethyl acetate, washed with 10% aq NH4Cl solution and saturated aq NaCl solution, dried over anhyd K2CO3, filtered, and concentrated under reduced pressure. The crude product (0.51 g, 2.68 mmol) was purified by SiO2 flash chromatography to give diol **2b** (0.51 g, 2.68 mmol, a 3:2 mixture of diastereomers) in 71% yield. Data for **2b** (major): 1H NMR  1.70–1.88 (m, 2H), 2.10–2.36 (m, 2H), 2.43 (d, *J* = 5.7 Hz, 1H), 2.93 (s, 1H), 3.80 (ddd, *J* = 8.4, 5.5, 4.4 Hz, 1H), 5.66 (dt, *Jd* = 9.9, *Jt* = 2.0 Hz, 1H), 6.01 (ddd, *J* = 9.9, 4.0, 3.3 Hz, 1H), 7.22–7.37 (m, 3H), 7.41–7.47 (m, 2H); 13C NMR  23.3, 26.2, 74.3, 75.8, 127.5, 127.7, 128.0, 130.1, 130.2, 141.5 ppm; IR (KBr) 3403, 2934 cm-1; HRMS (FAB+) cacld for C12H13O (C12H15O2 – H2O) 173.0966, found 173.0968.

**2-Methyl-3-cyclohexene-1,2-diol (2c).** Following the above general procedure of method A, the reaction of 6-acetoxy-2-cyclohexene-1-one (**1a**) (1.84 g, 11.93 mmol) and 1.6 M ether solution of MeLi (22.4 mL, 35.80 mmol) in THF (40 mL) gave diol **2c** (1.36 g, 10.78 mmol, a 3:2 mixture of diastereomers) in 89% yield. Data for **2c** (major): 1H NMR  1.28 (s, 3H), 1.61–1.84 (m, 2H), 1.94–2.22 (m, 2H), 2.27 (br s, 1H), 2.51 (br s, 1H), 3.53 (d, *J* = 6.4 Hz, 1H), 5.57 (t of A of ABq, *JAB* = 9.9, *Jt* = 2.1 Hz, 1H), 5.72 (dd of B of ABq, *JAB*= 9.9, *Jd* = 3.8, 3.3 Hz, 1H); 13C NMR  23.5, 26.4, 26.8, 69.4, 73.1, 129.2, 131.9 ppm; IR (KBr) 3414, 2934, 1661, 1370 cm-1; HRMS (FAB+) cacld for C7H11O (C7H13O2 – H2O) 111.0810, found 111.0810. Data for **2c** (minor): 1H NMR  1.28 (s, 3H), 1.58–1.70 (m, 1H), 1.75 (br s, 1H), 1.83–1.98 (m, 1H), 2.12–2.20 (m, 2H), 2.23 (br s, 1H), 3.78 (dd, *J* = 11.0, 3.5 Hz, 1H), 5.56 (t of A of ABq, *JAB* = 10.0, *Jt* = 1.9 Hz, 1H), 5.64 (t of B of ABq, *JAB*= 10.0, *Jt* = 3.3 Hz, 1H) ppm.

**General Procedure for the 1,2-Addition of Other Nucleophile (method B): 2-Ethyl-3-cyclohexene-1,2-diol (2c).** To a stirred solution of 6-acetoxy-2-cyclohexene-1-one (**1a**) (3.54 g, 22.96 mmol) in THF (35 mL) was added 1 M THF solution of EtMgBr (34.4 mL, 34.44 mmol) at –78 ºC. The mixture was stirred at that temperature for 2.5 h and then 1 M aq solution of NaOH (40 mL) was added. The resulting mixture was stirred at rt for 2 h, diluted with ethyl acetate, washed with 10% aq NH4Cl solution and saturated aq NaCl solution, dried over anhyd K2CO3, filtered, and concentrated under reduced pressure. The crude product was purified by SiO2 flash chromatography to give diol **2d** (2.44 g, 17.39 mmol, a 4:3 mixture of diastereoisomer) in 76% yield. Data for **2d** (major): 1H NMR  0.89 (t, *J* = 7.5 Hz, 3H), 1.52–1.87 (m, 4H), 1.97–2.24 (m, 2H), 2.51 (s, 1H), 2.80 (d, *J* = 7.0 Hz, 1H), 3.63 (br s, 1H), 5.59 (dt, *Jd* = 10.1, *Jt* = 2.0 Hz, 1H), 5.83 (ddd, *J* = 10.1, 4.5, 3.0 Hz, 1H); 13C NMR  8.0, 23.8, 26.7, 31.1, 70.3, 71.7, 130.3, 130.5 ppm; IR (KBr) 3386, 1508, 1458 cm-1; HRMS (CI+) cacld for C8H13O2 141.0915, found 141.0918.

**2-Butyl-3-cyclohexene-1,2-diol (2c).** Following the above general procedure of method A, the reaction of 6-acetoxy-2-cyclohexene-1-one (**1a**) (1.55 g, 10.05 mmol) and 1.6 M hexane solution of BuLi (28.3 mL, 45.24 mmol) in THF (70 mL) gave diol **2e** (0.76 g, 4.46 mmol, a 10:1 mixture of diastereomers) in 81% yield. Data for **2e** (major): 1H NMR  0.90 (t, *J* = 6.8 Hz, 3H), 1.20–1.38 (m, 4H), 1.45–1.58 (m, 1H), 1.63–1.86 (m, 3H), 1.97–2.23 (m, 2H), 2.56 (s, 1H), 2.83 (d, *J* = 7.7 Hz, 1H), 3.62 (ddd, *J* = 11.0, 6.2, 3.7 Hz, 1H), 5.60 (dt, *Jd* = 10.0, *Jt* = 1.9 Hz, 1H), 5.81 (ddd, *J* = 10.0, 4.4, 2.9 Hz, 1H); 13C NMR  14.0, 23.2, 23.7, 25.9, 26.7, 38.4, 70.7, 71.5, 130.1, 130.7 ppm; IR (KBr) 3390, 2934, 1456 cm-1; HRMS (FAB+) cacld for C10H17O (C10H19O2 – H2O) 153.1279, found 153.1276.

**2-(2-Methoxymethoxyphenyl)-3-cyclohexene-1,2-diol (2g).** Following the above general procedure of method A, the reaction of 6-acetoxy-2-cyclohexene-1-one (**1a**) (0.62 g, 4.00 mmol) and 2-methoxymethoxyphenyllithium [prepared from the reaction of 2-methoxymethoxy-1-bromobenzene (2.60 g, 12.00 mmol) and 1.7 M pentane solution of *t*-BuLi (15.5 mL, 26.40 mmol) in THF (40 mL) at –78 ºC for 1 h] at –78 ºC for 1.5 h gave **2g** (0.64 g, 2.33 mmol) in 58% yield, which was composed of a 8:1 mixture of diastereomers. Data for **2g** (major): 1H NMR  1.53–1.66 (m, 1H), 1.82–1.96 (m, 1H), 1.98–2.12 (m, 1H), 2.25–2.40 (m, 1H), 2.89 (d, *J* = 3.0 Hz, 1H), 3.52 (s, 3H), 4.13–4.18 (m, 1H), 4.51 (s, 1H), 5.28 (A of ABq, *JAB* = 7.3 Hz, 1H), 5.30 (B of ABq, *JAB* = 7.3 Hz, 1H), 5.66 (d, *J* = 10.1 Hz, 1H), 6.07 (dt, *Jd* = 10.1, *Jt* = 3.6 Hz, 1H), 6.98–7.04 (m, 1H), 7.13–7.18 (m, 1H), 7.22–7.28 (m, 1H), 7.39–7.43 (m, 1H); 13C NMR  21.7, 25.2, 56.6, 70.8, 75.4, 94.6, 114.6, 121.9, 128.8, 129.0, 129.7, 130.5, 131.6, 154.7 ppm; IR (KBr) 3479, 2934, 1485 cm-1; HRMS (CI+) cacld for C14H17O4 249.1127, found 249.1126.

**2-(2-Methoxymethoxyphenyl)-3-cycloheptene-1,2-diol (2h).** Following the above general procedure of method B, the reaction of 7-acetoxy-2-cycloheptene-1-one(**1f**) (0.50 g, 2.97 mmol) and 2-methoxymethoxyphenyllithium [prepared from the reaction of 2-methoxymethoxy-1-bromobenzene (1.90 g, 8.91 mmol) and 1.7 M pentane solution of *t*-BuLi (12.3 mL, 20.90 mmol) in THF (20 mL) at –78 ºC for 45 min] at –78 ºC for 50 min, followed by the hydrolysis of the remaining acetate by 1 M aq NaOH solution (30 mL) at rt for 22 h gave **2h** (0.49 g, 2.44 mmol) in 84% yield, which was composed of a 4:1 mixture of diastereomers. Data for **2h** (major): 1H NMR  1.45–1.62 (m, 2H), 1.80–2.40 (m, 4H), 2.51 (br s, 1H), 3.50 (s, 3H), 4.12 (s, 1H), 4.46 (d, *J* = 7.5 Hz, 1H), 5.25 (A of ABq, *JAB* = 6.8 Hz, 1H), 5.28 (B of ABq, *JAB* = 6.8 Hz, 1H), 5.59 (d, *J* = 12.5 Hz, 1H), 6.06 (ddd, *J* = 12.5, 6.8, 5.3 Hz, 1H), 6.99–7.06 (m, 1H), 7.14–7.20 (m, 1H), 7.22–7.30 (m, 1H), 7.48–7.56 (m, 1H); 13C NMR  21.7, 28.4, 31.0, 56.5, 73.4, 76.4, 82.4, 94.5, 114.7, 121.9, 129.1, 129.3, 132.5, 133.6, 154.6 ppm; IR (KBr) 3479, 2931, 1598, 1484 cm-1; HRMS (FAB+) cacld for C15H19O3 (C15H21O4 – H2O) 247.1334, found 247.1336.

**2-(2-Methoxymethylsulfanylphenyl)-3-cycloheptene-1,2-diol (2i).** Following the above general procedure of method B, the reaction of 7-acetoxy-2-cycloheptene-1-one(**1f**) (0.34 g, 1.90 mmol) and 2-methoxymethylsulfanylphenyllithium [prepared from the reaction of 2-methoxymethylsulfanyl-1-bromobenzene (1.34 g, 5.70 mmol) and 1.7 M pentane solution of *t*-BuLi (7.4 mL, 12.70 mmol) in THF (20 mL) at –78 ºC for 1 h] at –78 ºC for 2.5 h, followed by the hydrolysis of the remaining acetate by 1 M aq NaOH solution (30 mL) at rt for 2 d gave **2i** (0.46 g, 1.66 mmol) in 87% yield, which was composed of a 11:1 mixture of diastereomers.Data for **2i** (major): 1H NMR  1.57–1.94 (m, 3H), 1.98–2.38 (m, 4H), 3.45 (s, 3H), 3.55 (s, 1H), 4.63–4.70 (m, 1H), 4.94 (A of ABq, *JAB* = 11.4 Hz, 1H), 4.97 (B of ABq, *JAB* = 11.4 Hz, 1H), 5.67 (A of ABq, *JAB* = 12.1 Hz, 1H), 6.03 (dd of B of ABq, *JAB* = 12.1, *Jd* = 6.5, 5.4 Hz, 1H), 7.22–7.30 (m, 2H), 7.63–7.71 (m, 2H); 13C NMR  22.9, 28.4, 32.2, 56.6, 73.7, 79.0, 81.5, 126.8, 128.0, 128.3, 132.8, 133.5, 133.7, 134.1, 144.0 ppm; IR (KBr) 3432, 2927, 1461, 1083 cm-1; HRMS (CI+) cacld for C15H19O3S 279.1055, found 279.1058.

**1-Vinyl-cyclohexane-1,2-diol (7).** Following the above general procedure of method A, the reaction of 6-acetoxycyclohexane-1-one(**6**) (2.41 g, 15.4 mmol) and 1 M THF solution of vinylmagnesium bromide (46 mL, 46 mmol) in THF (30 mL) gave diol **7** (1.59 g, 11.2 mmol, a 17:1 mixture of diastereomers) in 85% yield. Data for **7**: 1H NMR  1.11–1.33 (m, 1H), 1.33–1.46 (m, 2H), 1.46–1.64 (m, 2H), 1.64–1.76 (m, 3H), 2.41 (br s, 1H), 2.51 (br s, 1H), 3.45 (d, *J* = 10.3 Hz, 1H), 5.14 (dd, *J* = 10.8, 1.4 Hz, 1H), 5.34 (dd, *J* = 17.6, 1.4 Hz, 1H), 5.85 (dd, *J* = 17.6, 10.8 Hz, 1H); 13C NMR  20.5, 23.6, 29.0, 35.4, 73.3, 74.2, 114.0, 143.5 ppm; IR (KBr) 3422, 2938, 1449 cm-1; HRMS (CI+) cacld for C8H13O2 141.0915, found 141.0910.

**General Procedure for Oxidative Ring Cleavage Reaction: 2-Hexenedial (3a)** [Hudlicky, T.; Luna, H.; Barbieri, G.; Kwart, L. D. *J. Am. Chem. Soc.* **1988**, *110*, 4735]**.** To a stirred solution of 3-cyclohexene-1,2-diol (**2a**) (0.68 g, 5.96 mmol) in MeCN (30 mL) was added Pb(OAc)4 (2.70 g, 5.96 mmol). The reaction mixture was stirred at rt for 10 min, diluted with ethyl acetate, washed with 1 M aq HCl solution, dried over anhyd Na2SO4, filtered, and concentrated under reduced pressure. The crude product (0.56 g, 5.00 mmol, 85% yield) was purified by SiO2 flash chromatography to give dial **3a** (0.45 g, 4.01 mmol) in 68% yield, which was composed of the *E*-isomer. The crude product was pure enough to be used for the Baylis-Hillman reaction without further purification.

**6-Oxo-6-phenyl-4-hexenal (3b)** [Richards, E. L.; Murphy, P. J.; Dinon, F.; Fratucello, S.; Brown, P. M.; Gelbrich, T.; Hursthouse, M. B. *Tetrahedron* **2001**, *57*, 7771]**.** Following the above general procedure, the reaction of 2-phenyl-3-cyclohexene-1,2-diol (**2b**) (1.09 g, 5.76 mmol) and Pb(OAc)4 (2.68 g, 5.76 mmol) in MeCN (50 mL) at rt for 10 min gave aldehyde **3b** (0.76 g, 4.06 mmol) in 70% yield (crude yield of **3b**: 1.11 g, 5.60 mmol, 98%), which was composed of the *E*-isomer.

**6-Oxo-4-heptenal (3c).** Following the above general procedure, the reaction of 2-methyl-3-cyclohexene-1,2-diol (**2c**) (1.15 g, 9.02 mmol) and Pb(OAc)4 (4.20 g, 9.02 mmol) in MeCN (40 mL) at rt for 10 min gave aldehyde **3c** (1.01 g, 8.02 mmol) in 89% yield (crude yield of **3c**: 1.12 g, 8.90 mmol, 99%), which was composed of the *E*-isomer. Data for **(*E*)-3c**: 1H NMR  2.25 (s, 3H), 2.52–2.62 (m, 2H), 2.65–2.72 (m, 2H), 6.10 (dt, *Jd* = 16.0, *Jt* = 1.5 Hz, 1H), 6.80 (dt, *Jd* = 16.0, *Jt* = 6.5 Hz, 1H), 9.81–9.83 (m, 1H); 13C NMR  24.5, 26.8, 41.7, 131.7, 145.5, 198.2, 200.4 ppm; IR (KBr) 2836, 1722, 1673, 1627, 1426, 1363 cm-1; HRMS (FAB+) cacld for C7H11O2 127.0759, found 127.0763.

When the reaction was stopped within 5 min the *Z*-isomer can be obtained. Data for **(*Z*)-3c**: 1H NMR  2.22 (s, 3H), 2.62 (ddt, *Jd* = 1.1, 0.4, *Jt* = 7.0 Hz, 2H), 2.90 (ddq, *Jd* = 1.4, 0.5, *Jq* = 7.8 Hz, 2H), 6.09 (t of A of ABq, *JAB* = 11.2, *Jt* = 7.4 Hz, 1H), 6.20 (t of B of ABq, *JAB* = 11.2, *Jt* = 1.4 Hz, 1H), 9.78 (t, *Jt* = 1.3 Hz, 1H); 13C NMR  22.1, 31.5, 43.0, 127.9, 145.4, 199.0, 201.3 ppm.

**6-Oxo-4-octenal (3d).** Following the above general procedure, the reaction of 2-ethyl-3-cyclohexene-1,2-diol (**2d**) (1.33 g, 9.48 mmol) and Pb(OAc)4 (4.42 g, 9.48 mmol) in MeCN (40 mL) at rt for 10 min gave aldehyde **3d** (0.81 g, 5.88 mmol) in 62% yield (crude yield of **3d**: 0.45 g, 3.20 mmol, 83%), which was composed of the *E*-isomer. Data for **(*E*)-3d**: 1H NMR  1.09 (t, *Jt* = 7.3 Hz, 3H), 2.50–2.61 (m, 4H), 2.64–2.71 (m, 2H), 6.13 (dt, *Jd* = 16.0, *Jt* = 1.6 Hz, 1H), 6.82 (dt, *Jd* = 16.0, *Jt* = 6.6 Hz, 1H), 9.81 (s, 1H); 13C NMR  8.0, 24.5, 33.4, 41.9, 130.7, 143.9, 200.4, 200.7 ppm; IR (KBr) 2940, 1714, 1629, 1460, 1379 cm-1; HRMS (CI+) cacld for C8H13O2 141.0916, found 141.0916.

**6-Oxo-4-decenal (3e).** Following the above general procedure, the reaction of 2-butyl-3-cyclohexene-1,2-diol (**2e**) (0.28 g, 1.69 mmol) and Pb(OAc)4 (0.78 g, 1.67 mmol) in MeCN (20 mL) at rt for 10 min gave aldehyde **3e** (0.26 g, 1.57 mmol) in 93% yield (crude yield of **3e**: 0.28 g, 1.70 mmol, 99%), which was composed of the *E*-isomer. Data for **(*E*)-3e**: 1H NMR  0.91 (t, *J* = 7.4 Hz, 3H), 1.33 (sextet, *J* = 7.4 Hz, 2H), 1.52–1.65 (m, 2H), 2.40–2.59 (m, 4H), 2.63–2.74 (m, 2H), 6.13 (dt, *Jd* = 16.0, *Jt* = 1.6 Hz, 1H), 6.81 (dt, *Jd* = 16.0, *Jt* = 6.5 Hz, 1H), 9.81 (t, *J* = 2.0 Hz, 1H); 13C NMR  13.8, 22.4, 24.6, 26.2, 40.1, 41.9, 131.0, 144.0, 200.3, 200.4 ppm ; IR (KBr) 2930, 1724, 1668, 1633, 1455 cm-1; HRMS (CI+) cacld for C10H17O2 169.1228, found 169.1225.

When the reaction was stopped within 5 min the *Z*-isomer can be obtained. Data for **(*Z*)-3e**: 1H NMR  0.91 (t, *J* = 7.3 Hz, 3H), 1.33 (sextet, *J* = 7.3 Hz, 2H), 1.57 (quintet, *J* = 7.3 Hz, 2H), 2.46 (t, *J* = 7.3 Hz, 2H), 2.62 (t, *J* = 7.2 Hz, 2H), 2.90 (q, *J* = 7.2 Hz, 2H), 6.08 (dt of A of ABq, *JAB* = 11.4, *Jd* = 1.1, *Jt* = 7.3 Hz, 1H), 6.19 (d of B of ABq, *JAB* = 11.4, *Jd* = 1.1 Hz, 1H), 9.76–9.70 (m, 1H); 13C NMR  13.8, 22.2, 22.3, 26.0, 43.1, 44.0, 127.6, 145.1, 201.4, 201.8 ppm.

**2-Heptenedial (3f).** Following the above general procedure, the reaction of 3-cycloheptene-1,2-diol (**2f**) (0.37 g, 2.88 mmol) and Pb(OAc)4 (1.35 g, 2.88 mmol) in MeCN (30 mL) at rt for 10 min gave dialdehyde **3f** (0.35 g, 2.80 mmol) in 97% yield (crude yield of **3f**: 0.36 g, 2.90 mmol, 99%), which was mostly composed of the *E*-isomer. Data for **(*E*)-3f**: 1H NMR  1.87 (quintet, *J* = 7.3 Hz, 2H), 2.40 (dq, *Jd* = 1.5, *Jq* = 6.8 Hz, 2H), 2.54 (dt, *Jd* = 1.3, *Jt* = 6.8 Hz, 2H), 6.14 (ddt, *Jd* = 15.7, 7.7, *Jt* = 1.6 Hz, 1H), 6.83 (dt, *Jd* = 15.7, *Jt* = 6.8 Hz, 1H), 9.54 (d, *J* = 7.9 Hz, 1H), 9.82 (t, *J* = 1,3 Hz, 1H) ppm; 13C NMR  20.0, 31.7, 42.8, 133.4, 156.9, 193.7, 201.2 ppm; IR (KBr) 2938, 1716, 1698, 1541, 1457 cm-1; HRMS (CI+) cacld for C7H9O2 126.0602, found 125.0603. Data for **(*Z*)-3f**: 1H NMR  2.67 (dq, *Jd* = 1.4, *Jq* = 8.4 Hz, 2H), 6.01 (ddt, *Jd* = 11.2, 8.0, *Jt* = 1.6 Hz, 1H), 6.59 (dt, *Jd* = 11.2, *Jt* = 8.1 Hz, 1H), 10.10 (d, *J* = 7.8 Hz, 1H) ppm.

**6-(2-Hydroxyphenyl)-6-oxo-4-hexenal (3g).** Following the above general procedure, the reaction of 2-(2-methoxymethoxyphenyl)-3-cyclohexene-1,2-diol (**2g**) (0.25 g, 0.98 mmol) and Pb(OAc)4 (0.55 g, 1.18 mmol) in MeCN (20 mL) at rt for 10 min gave **3g** (0.20 g, 0.96 mmol) in 98% yield, which was composed of the *E*-isomer.Data for **(*E*)-3g**: 1H NMR  2.64–2.79 (m, 4H), 6.88–6.96 (m, 1H), 6.98–7.03 (m, 1H), 7.10 (A of ABq, *JAB* = 15.3 Hz, 1H), 7.15 (dd of ABq, *JAB* = 15.3, *Jd* = 6.0, 5.5 Hz, 1H), 7.45–7.53 (m, 1H), 7.77–7.82 (m, 1H), 9.83–9.86 (m, 1H), 12.62 (s, 1H); 13C NMR  25.1, 41.9, 118.5, 118.8, 119.4, 125.0, 129.8, 136.5, 147.5, 163.5, 193.7, 200.2 ppm; IR (KBr) 2913, 1721, 1637, 1590, 1488 cm-1; HRMS (EI+) cacld for C12H12O3, 204.0786, found 204.0786.

When the reaction was stopped within 5 min the *Z*-isomer can be obtained. Data for **(*Z*)-3g**: 1H NMR  2.67–2.75 (m, 2H), 2.88–2.98 (m, 2H), 6.39 (dt, *Jd* = 11.5, *Jt* = 7.6 Hz, 1H), 6.89 (dt, *Jd* = 1.2, *Jt* = 7.7 Hz, 1H), 6.91 (d, *J* = 11.5 Hz, 1H), 6.99 (dd, *J* = 8.4, 0.9 Hz, 1H), 7.47 (ddd, *J* = 8.4, 7.7, 1.6 Hz, 1H), 7.74 (dd, *J* = 7.7, 1.2 Hz, 1H), 9.81–9.83 (m, 1H), 12.53 (s, 1H); 13C NMR  22.7, 43.0, 118.5, 118.8, 120.2, 124.3, 130.1, 136.4, 147.4, 163.2, 196.5, 201.1 ppm.

**7-(2-Methoxymethoxyphenyl)-7-oxo-5-heptenal (3h).** Following the above general procedure, the reaction of 2-(2-methoxymethoxyphenyl)-3-cycloheptene-1,2-diol (**2h**) (0.20 g, 0.71 mmol) and Pb(OAc)4 (0.36 g, 0.78 mmol) in MeCN (30 mL) at rt for 10 min gave **3h** (0.16 g, 0.60 mmol) in 84% yield, which was composed of the *E*-isomer.Data for **(*E*)-3h**: 1H NMR  1.84 (quintet, *J* = 7.3 Hz, 1H), 2.32 (q, *J* = 6.6 Hz, 1H), 2.50 (t, *J* = 7.1 Hz, 2H), 3.48 (s, 3H), 5.21 (s, 2H), 6.69 (A of ABq, *JAB* = 15.7, 1H), 6.81 (t of B of ABq, *JAB* = 15.7, *Jt* = 6.6 Hz, 1H), 7.06 (t, *J* = 7.0 Hz, 1H), 7.17 (d, *J* = 8.4 Hz, 1H), 7.42 (dd, *J* = 8.4, 7.3 Hz, 1H), 7.48 (dd, *J* = 7.6, 1.7 Hz, 1H); 13C NMR  20.4, 31.6, 43.0, 56.3, 94.8, 115.2, 121.9, 129.8, 130.0, 131.4, 132.4, 147.1, 155.3, 193.5, 201.6 ppm; IR (KBr) 2940, 1727, 1598, 1484 cm-1; HRMS (FAB+) cacld for C15H19O4 263.1283, found 263.1284.

**7-(2-Methoxymethylsulfanylphenyl)-7-oxo-5-heptenal (3i).** Following the above general procedure, the reaction of 2-(2-methoxymethylsulfanylphenyl)-3-cycloheptene-1,2-diol(**2i**) (0.26 g, 0.94 mmol) and Pb(OAc)4 (0.53 g, 1.13 mmol) in MeCN (20 mL) at rt for 5 min gave **3i** (0.20 g, 0.73 mmol) in 75% yield, which was mostly composed of the *Z*-isomer.Data for **(*Z*)–3i**: 1H NMR  1.84 (quint, *J* = 7.5 Hz, 2H), 2.52 (dt, *Jd* = 1.5, *Jt* = 7.5 Hz, 2H), 2.67 (dq, *Jd* = 1.5, *Jq* = 7.5 Hz, 2H), 3.45 (s, 3H), 4.97 (s, 2H), 6.27 (dt, *Jd* = 11.6, *Jt* = 7.5 Hz, 1H), 6.65 (dt, *Jd* = 11.5, *Jt* = 1.5 Hz, 1H), 7.25 (dt, *Jd* = 1.4, *Jt* = 7.7 Hz, 1H), 7.43 (dt, *Jd* = 1.4, *Jt* = 7.7 Hz, 1H), 7.64 (dd, *J* = 7.7, 1.4 Hz, 1H), 7.78 (d, *J* = 7.7 Hz, 1H), 9.79 (t, *J* = 1.5 Hz, 1H); 13C NMR  21.5, 28.9, 43.3, 56.2, 76.7, 125.3, 127.3, 128.9, 129.5, 131.8, 138.4, 138.6, 147.7, 193.6, 202.1 ppm; IR (KBr) 2932, 1721, 1660, 1613, 1463, 1085 cm-1; HRMS (CI+) cacld for C15H19O3S 279.1055, found 279.1050. Data for **(*E*)-3i**: 1H NMR  1.84 (quint, *J* = 7.2 Hz, 2H), 2.34 (q, *J* = 7.2 Hz, 2H), 2.51 (t, *J* = 7.2, 2H), 3.42 (s, 3H), 4.92 (s, 2H), 6.59 (A of ABq, *JAB* = 15.9 Hz, 1H), 6.74 (t of B of ABq, *JAB* = 15.9, *Jt* = 6.6 Hz, 1H), 7.23–7.34 (m, 1H), 7.38–7.50 (m, 2H), 7.70–7.76 (m, 1H), 9.79 (s, 1H) ppm.

**6-Oxo-7-octenal (8).** Following the above general procedure, the reaction of 2-vinyl-3-cyclohexene-1,2-diol (**7**) (1.28 g, 9.13 mmol) and Pb(OAc)4 (4.26 g, 9.13 mmol) in MeCN (50 mL) at rt for 10 min gave aldehyde **8** (1.20 g, 8.56 mmol) in 94% yield (crude yield of **8**: 1.26 g, 9.00 mmol, 99%). Data for **8**: 1H NMR  1.61–1.71 (m, 4H), 2.44–2.52 (m, 2H), 2.59–2.67 (m, 2H), 5.84 (dq, *Jd* = 10.2, *Jq* = 1.3 Hz, 1H), 6.24 (q of A of ABq, *JAB* = 17.7, *Jq* = 1.3 Hz, 1H), 6.36 (dt of B of ABq, *JAB* = 17.7, *Jd* = 10.2, *Jt* = 1.3 Hz, 1H), 9.77 (quintet, *J* = 1.3 Hz, 1H); 13C NMR  21.4, 23.1, 39.0, 43.5, 128.0, 136.3, 200.1, 202.1 ppm; IR (KBr) 2931, 1715 cm-1; HRMS (FAB+) cacld for C8H13O2 141.0916, found 141.0914.

**General Procedure for the Intramolecular Baylis-Hillman Reaction: 5-Hydroxy-1-cyclopentenecarbaldehyde (4a) (entry 5, Table 2).** To a stirred solution of 2-hexenedial (**3a**) (0.43 g, 3.83 mmol) in *t*-BuOH (35 mL) was added PPh3 (1.10 g, 4.21 mmol) at 30 ºC. The mixture was stirred at that temperature for 12 h, diluted with ethyl acetate, washed with H2O, dried over anhyd Na2SO4, filtered, and concentrated under reduced pressure. The crude product was purified by SiO2 flash chromatography to give **4a** (0.42 g, 3.75 mmol) in 98% yield. Data for **4a**: 1H NMR  1.80–1.95 (m, 1H), 2.30–2.60 (m, 2H), 2.65–2.83 (m, 2H), 5.18 (br s, 1H), 7.00 (t, *J* = 2.6 Hz, 1H), 9.82 (s, 1H); 13C NMR  31.6, 32.1, 73.9, 147.8, 154.3, 190.4 ppm; IR (KBr) 3429, 2940, 1683 cm-1; HRMS (CI+) cacld for C6H9O2 113.0603, found 113.0604.

**(5-Hydroxy-1-cyclopentenyl)-phenyl-methanone (4b)** [Richards, E. L.; Murphy, P. J.; Dinon, F.; Fratucello, S.; Brown, P. M.; Gelbrich, T.; Hursthouse, M. B. *Tetrahedron* **2001**, *57*, 7771] **(entry 8, Table 2).** Following the above general procedure, the reaction of 6-oxo-6-phenyl-4-hexenal (**3b**) (0.19 g, 1.02 mmol) and PPh3 (0.32 g, 1.22 mmol) in MeCN (15 mL) at 20 ºC for 22 h gave **4b** (0.19 g, 1.00 mmol) in 99% yield.

**1-(5-Hydroxy-1-cyclopentenyl)-ethanone (4c) (entry 11, Table 2)** [Graf, C.-D.; Knochel, P. *Tetrahedron* **1999**, *55*, 8801]**.** Following the above general procedure, the reaction of 6-oxo-4-heptenal (**3c**) (0.47 g, 3.75 mmol) and PPh3 (1.19 g, 4.50 mmol) in MeCN (20 mL) at 20 ºC for 24 h gave **4c** (0.39 g, 3.13 mmol) in 83% yield.

**1-(5-Hydroxy-1-cyclopentenyl)-1-propanone (4d) (entry 16, Table 2).** Following the above general procedure, the reaction of 6-oxo-4-octenal (**3d**) (0.23 g, 1.64 mmol) and PPh3 (0.43 g, 1.64 mmol) in *t*-BuOH (20 mL) at 40 ºC for 15 h gave **4d** (0.18 g, 1.27 mmol) in 78% yield. Data for **4d**: 1H NMR  1.12 (t, *J* = 7.3 Hz, 3H), 1.77–1.89 (m, 1H), 2.27–2.53 (m, 2H), 2.63–2.78 (m, 1H), 2.73 (dq, *Jd* = 1.6, *Jq* = 7.3 Hz, 2H), 3.10 (d, *J* = 1.3 Hz, 1H), 5.15 (br s, 1H), 6.85 (t, *J* = 2.7 Hz, 1H); 13C NMR  8.0, 31.0, 31.2, 32.0, 75.5, 145.4, 145.5, 200.9 ppm; IR (KBr) 3444, 2939, 1664, 1377 cm-1; HRMS (FAB+) cacld for C8H13O2 141.0916, found 141.0915.

**1-(5-Hydroxy-1-cyclopentenyl)-1-pentanone (4e) (entry 18, Table 2).** Following the above general procedure, the reaction of 6-oxo-4-decenal (**3e**) (0.46 g, 2.73 mmol) and PPh3 (0.86 g, 3.27 mmol) in *t*-BuOH (20 mL) at 30 ºC for 25 h gave **4e** (0.38 g, 2.28 mmol) in 83% yield. Data for **4e**: 1H NMR  0.87–0.95 (m, 3H), 1.26–1.41 (m, 2H), 1.54–1.67 (m, 2H), 1.75–1.89 (m, 1H), 2.24–2.56 (m, 2H), 2.62–2.76 (m, 3H), 3.20 (br s, 1H), 5.08–5.17 (m, 1H), 6.84 (br s, 1H); 13C NMR  13.8, 22.3, 26.4, 31.0, 31.3, 38.7, 75.5, 145.5, 145.8, 200.7 ppm; IR (KBr) 3454, 2961, 1658, 1382 cm-1; HRMS (FAB+) cacld for C10H17O2 169.1229, found 169.1234.

**6-Hydroxy-1-cyclohexenecarbaldehyde (4f) (entry 19, Table 2).** Following the above general procedure, the reaction of 2-heptenedial(**3f**) (0.16 g, 1.30 mmol) and PPh3 (0.34 g, 1.30 mmol) in *t*-BuOH (20 mL) at 80 ºC for 29 h gave **4f** (0.12 g, 0.95 mmol) in 73% yield. Data for **4f**: 1H NMR  1.55–1.96 (m, 4H), 2.24–2.50 (m, 2H), 3.19 (s, 1H), 4.60–4.66 (m, 1H), 6.93 (t, *J* = 3.8 Hz, 1H), 9.44 (s, 1H); 13C NMR  18.1, 26.8, 29.6, 62.7, 142.7, 153.7, 195.2 ppm; IR (KBr) 3434, 2933, 1683, 1541 cm-1; HRMS (CI+) cacld for C7H11O2 127.0759, found 127.0758.

**(5-Hydroxy-1-cyclopentenyl)-(2-hydroxyphenyl)-methanone (4g).** Following the above general procedure, the reaction of 6-(2-hydroxyphenyl)-6-oxo-4-hexenal (**3g**) (0.15 g, 0.73 mmol) and PPh3 (0.21 g, 0.80 mmol) in *t*-BuOH (15 mL) at 30 ºC for 39 h gave **4g** (0.14 g, 0.67 mmol) in 91% yield.Data for **4g**: 1H NMR  1.90–2.01 (m, 1H), 2.27–2.40 (m, 1H), 2.51–2.65 (m, 1H), 2.76–2.90 (m, 1H), 3.16 (br s, 1H), 5.28 (br s, 1H), 6.71 (t, *J* = 2.6 Hz, 1H), 6.90 (ddd, *J* = 7.7, 7.2, 0.9 Hz, 1H), 7.02 (dd, *J* = 8.3, 0.9 Hz, 1H), 7.50 (ddd, *J* = 7.7, 7.2, 1.5 Hz, 1H), 7.77 (dd, *J* = 8.3, 1.5 Hz, 1H), 11.79 (s, 1H); 13C NMR  31.5, 32.1, 77.2, 118.4, 118.8, 119.7, 131.9, 136.4, 143.5, 147.7, 162.5, 198.7 ppm; IR (KBr) 3390, 2928, 1680, 1608, 1463 cm-1; HRMS (FAB+) cacld for C12H13O3 205.0865, found 205.0861.

**(6-Hydroxy-1-cyclohexenyl)-(2-methoxymethoxyphenyl)-methanone (4h).** Following the above general procedure, the reaction of 7-(2-methoxymethoxyphenyl)-7-oxo-5-heptenal(**3h**)(39 mg, 0.15 mmol) and PPh3 (43 mg, 0.16 mmol) in MeCN (15 mL) at reflux for 7 h gave **4h** (29 mg, 0.11 mmol) in 75% yield.Data for **4h**: 1H NMR  1.58 (s, 1H), 1.51–1.70 (m, 1H), 1.75–1.94 (m, 3H), 2.10–2.37 (m, 2H), 3.44 (s, 3H), 4.79 (br s, 1H), 5.15 (s, 2H), 6.66 (t, *J* = 4.1 Hz, 1H), 7.04 (dt, *Jd* = 0.7, *Jt* = 7.4 Hz, 1H), 7.16 (d, *J* = 8.4 Hz, 1H), 7.22 (dd, *J* = 7.4, 1.8 Hz, 1H), 7.38 (ddd, *J* = 8.4, 7.4, 1.5 Hz, 1H); 13C NMR  17.6, 26.7, 29.8, 56.3, 63.4, 94.7, 115.2, 121.5, 128.8, 129.6, 131.2, 141.6, 148.4, 154.4, 199.2 ppm; IR (KBr) 3500, 2937, 1635, 1486 cm-1; HRMS (FAB+) cacld for C15H19O4 263.1283, found 263.1285.

**(6-Hydroxy-1-cyclohexenyl)-(2-methoxymethylsulfanylphenyl)-methanone (4i).** Following the above general procedure, the reaction of 7-(2-methoxymethylsulfanylphenyl)-7-oxo-5-heptenal (**3i**) (0.11 g, 0.40 mmol) and PPh3 (0.13 g, 0.46 mmol) in *t*-BuOH (10 mL) at 30 ºC for 92 h gave **4i** (72 mg, 0.26 mmol) in 65% yield.Data for **4i**: 1H NMR  1.55–1.70 (m, 1H), 1.75–1.98 (m, 3H), 2.10–2.38 (m, 2H), 3.40 (s, 3H), 4.80 (br s, 1H), 4.88 (s, 2H), 6.58 (t, *J* = 3.9 Hz, 1H), 7.25–7.30 (m, 2H), 7.40 (ddd, *J* = 7.9, 6.0, 3.0 Hz, 1H), 7.68 (d, *J* = 7.9 Hz, 1H); 13C NMR  17.5, 26.7, 29.7, 56.2, 63.3, 78.2, 126.3, 128.0, 130.4, 131.5, 134.4, 140.6, 141.4, 149.3, 199.8 ppm; IR (KBr) 3501, 2937, 1633, 1434, 1083 cm-1; HRMS (FAB+) cacld for C15H19O3S 279.1055, found 279.1055.

**3-Hydroxy-2-methylene-1-cycloheptanone (9).** Following the above general procedure, the reaction of 6-oxo-7-octenal(**8**) (0.52 g, 3.69 mmol) and PPh3 (0.98 g, 3.69 mmol) in *t*-BuOH (35 mL) at 20 ºC for 4 h gave **9** (0.42 g, 3.02 mmol) in 84% yield. Data for **9**: 1H NMR  1.63–1.80 (m, 3H), 1.86–2.04 (m, 3H), 2.47–2.57 (m, 1H), 2.67–2.78 (m, 1H), 2.72 (br s, 1H), 4.62 (d, *J* = 7.5 Hz, 1H), 5.52 (s, 1H), 6.01 (s, 1H); 13C NMR  24.3, 25.8, 38.0, 43.3, 72.2, 121.9, 151.6, 203.2 ppm; IR (KBr) 3452, 2933, 1685, 1609 cm-1; HRMS (CI+) cacld for C8H13O2 141.0915, found 141.0914.

**3,3a-Dihydro-2*H*-cyclopenta[*b*]chromen-9-one (5g).** To a stirred solution of (5-hydroxy-1-cyclopentenyl)-(2-hydroxyphenyl)-methanone (**4g**) (60 mg, 0.29 mmol) in benzene (20 mL) was added *p*-TsOH (20 mg, 0.08 mmol) at rt. The mixture was then heated to reflux for 3 h. Upon cooling to rt, the mixture was diluted with ether, washed with H2O, dried over anhyd Na2SO4, filtered and concentrated under reduced pressure. The crude product was purified by SiO2 flash chromatography to give **5g** (50 mg, 0.27 mmol) in 93% yield. Data for **5g**: 1H NMR  2.15–2.29 (m, 1H), 2.46–2.61 (m, 1H), 2.64–2.83 (m, 2H), 5.42–5.51 (m, 1H), 6.98 (t, *J* = 3.6 Hz, 1H), 6.95–7.00 (m, 1H), 7.03 (ddd, *J* = 7.9, 7.2, 0.9 Hz, 1H), 7.48 (ddd, *J* = 7.9, 7.2, 1.9 Hz, 1H), 7.98 (dd, *J* = 7.9, 1.9 Hz, 1H); 13C NMR  30.9, 31.7, 84.5, 118.3, 121.6, 122.8, 127.6, 135.9, 139.0, 141.3, 161.2, 181.0 ppm; IR (KBr) 2943, 1739, 1670, 1637, 1606, 1461, 1308 cm-1; HRMS (EI+) cacld for C12H10O2 186.0681, found 186.0681.

**2,3,4,4a-Tetrahydroxanthen-9-one (5h).** To a stirred solution of (6-hydroxy-1-cyclohexenyl)-(2-methoxymethoxyphenyl)-methanone (**4h**) (14 mg, 0.054 mmol) in THF (5 mL) was added 3 M aq solution of HCl (10 mL). The mixture was stirred at rt for 4.5 h, extracted with ethyl acetate, washed with H2O, dried over anhyd Na2SO4, filtered, and concentrated to give the deprotection product (10 mg, 0.046 mmol, 85% yield). The deprotected product was dissolved in benzene (20 mL), and *p*-TsOH (3.2 mg, 0.016 mmol) was added to the solution. The mixture was then heated to reflux for 3 h, cooled to rt, diluted with ethyl acetate, washed with H2O, dried over anhyd Na2SO4, filtered, and concentrated. The crude product was purified by SiO2 flash chromatography to give **5h** (6.7 mg, 0.021 mmol) in 71% yield. Data for **5h**:1H NMR  1.60–1.77 (m, 1H), 1.85–2.03 (m, 2H), 2.25–2.40 (m, 3H), 4.94–5.02 (m, 1H), 6.96 (dd, *J* = 8.3, 1.1 Hz, 1H), 7.03 (ddd, *J* = 7.9, 7.0, 1.1 Hz, 1H), 7.14 (br s, 1H), 7.46 (ddd, *J* = 8.3, 7.0, 1.7 Hz, 1H), 7.96 (dd, *J* = 7.9, 1.7 Hz, 1H); 13C NMR  19.4, 25.8, 28.7, 75.4, 117.9, 121.7, 122.1, 127.9, 134.1, 135.6, 139.3, 161.5, 182.1 ppm; IR (KBr) 2917, 1679, 1600, 1464 cm-1; HRMS (FAB+) cacld for C13H13O2 201.0916, found 201.0915.

**2,3,4,4a-Tetrahydrothioxanthen-9-one (5i).** To a stirred solution of (6-hydroxy-1-cyclohexenyl)-(2-methoxymethylsulfanylphenyl)-methanone (**4i**) (40 mg, 0.15 mmol) in THF (5 mL) was added 3 M aq solution of HCl (10 mL). The mixture was stirred at rt for 21 h, extracted with ethyl acetate, washed with H2O, dried over anhyd Na2SO4, filtered, and concentrated. The crude product was purified by SiO2 flash chromatography to give **5i** (26 mg, 0.12 mmol) in 81% yield.Data for **5i**: 1H NMR  1.62–1.94 (m, 3H), 2.14–2.24 (m, 1H), 2.21–2.41 (m, 1H), 4.24 (br s, 1H), 7.17 (dt, *Jd* = 1.6, *Jt* = 4.3 Hz, 1H), 7.19–7.25 (m, 1H), 7.26–7.30 (m, 1H), 7.34–7.41 (m, 1H), 8.10–8.14 (m, 1H); 13C NMR  19.8, 25.8, 28.0, 40.0, 125.6, 127.7, 130.2, 131.9, 132.9, 135.6, 139.2, 141.3, 185.6 ppm; IR (KBr) 2935, 1664, 1608, 1586, 1437, 1285 cm-1; HRMS (FAB+) cacld for C13H13OS 217.0687, found 217.0692.


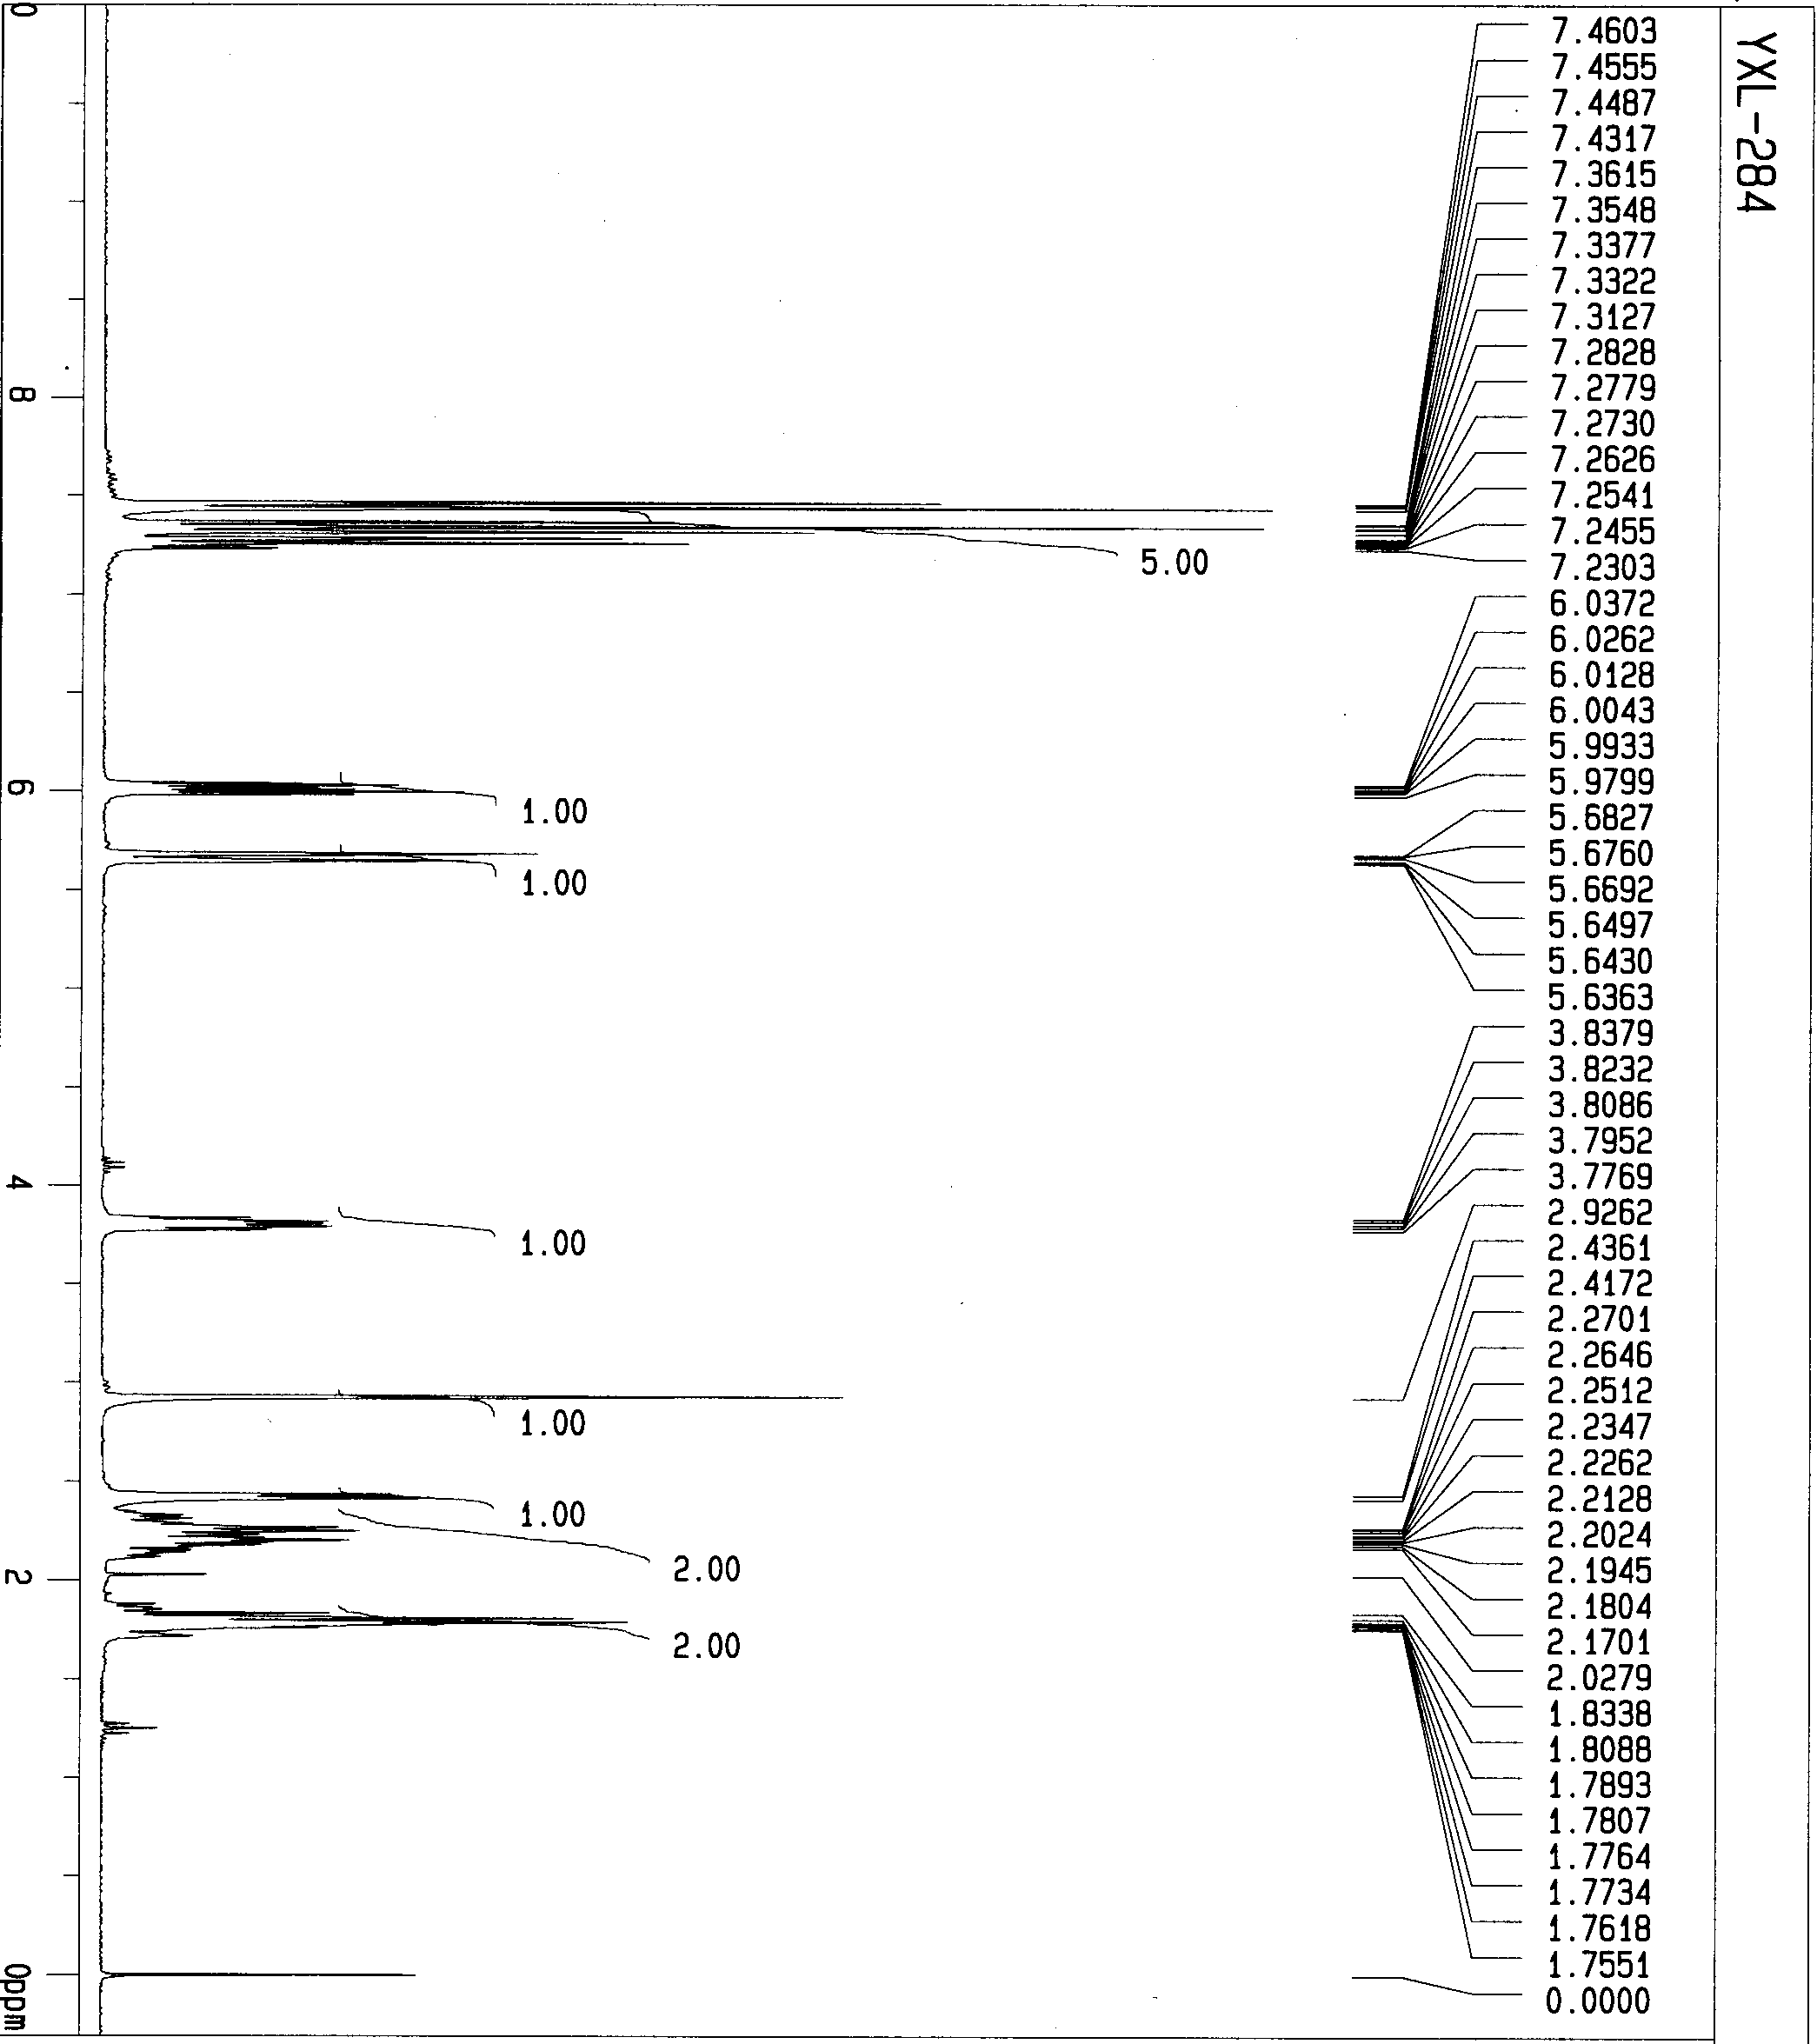


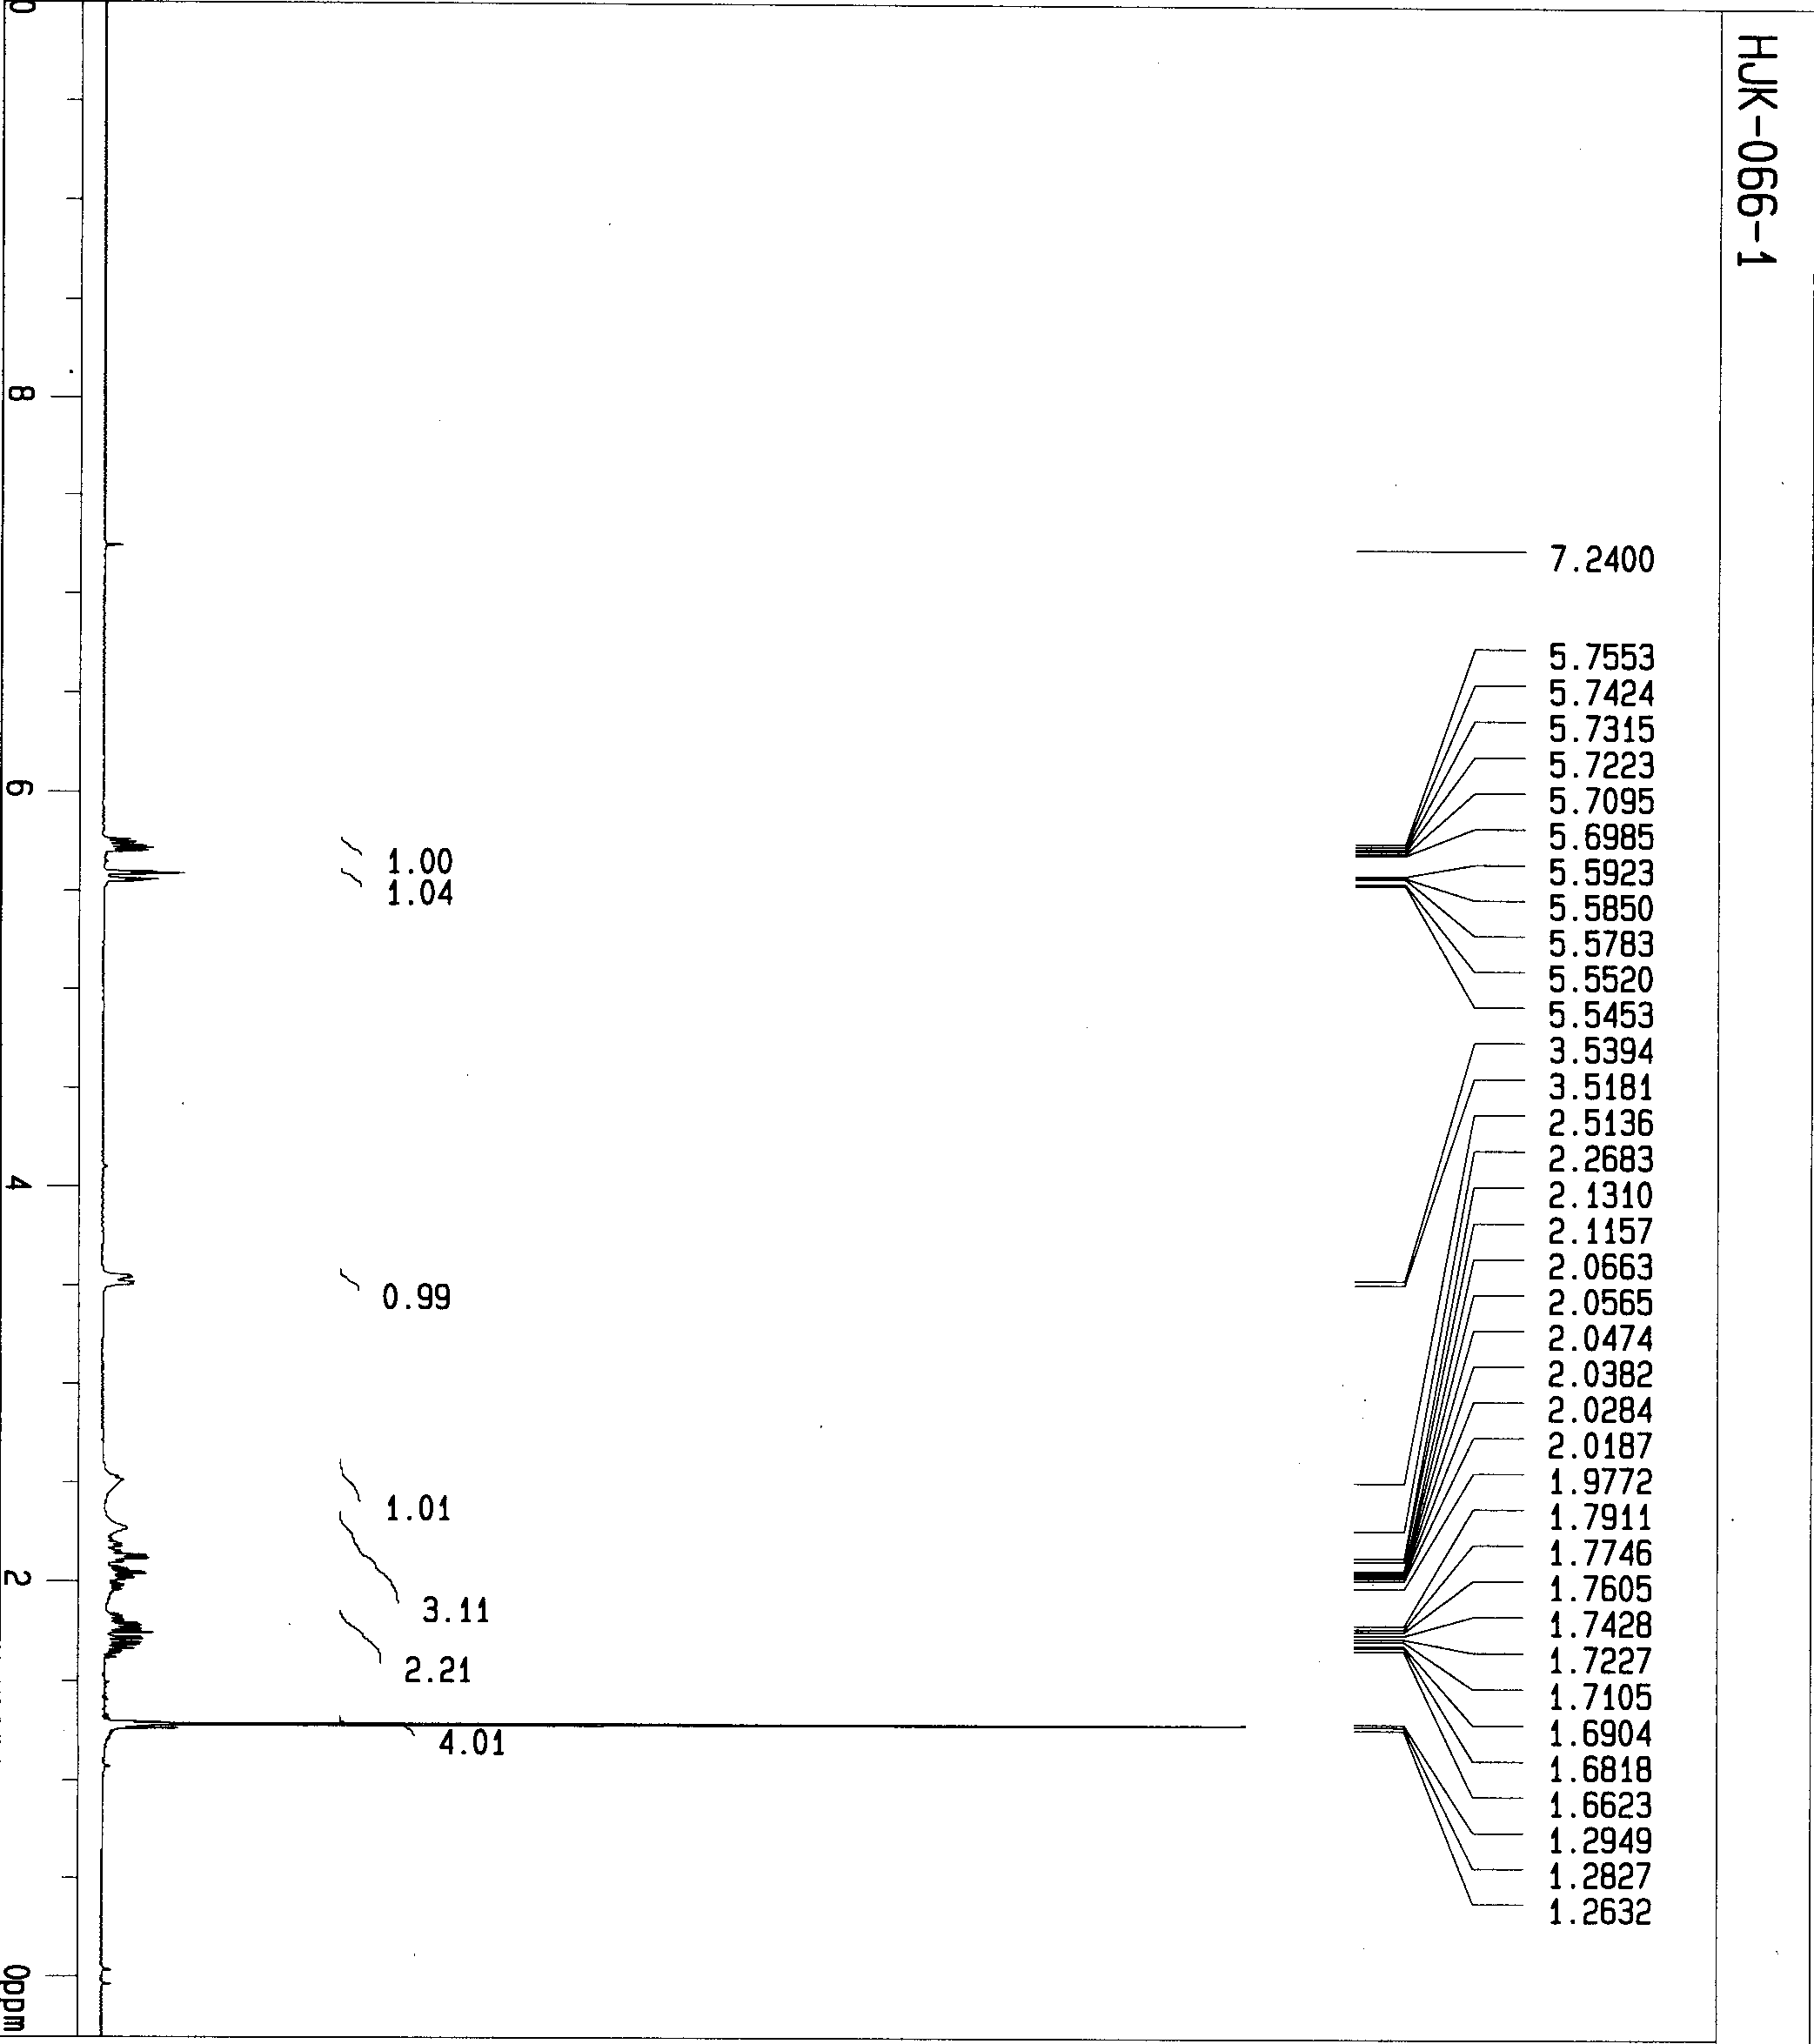
major isomer


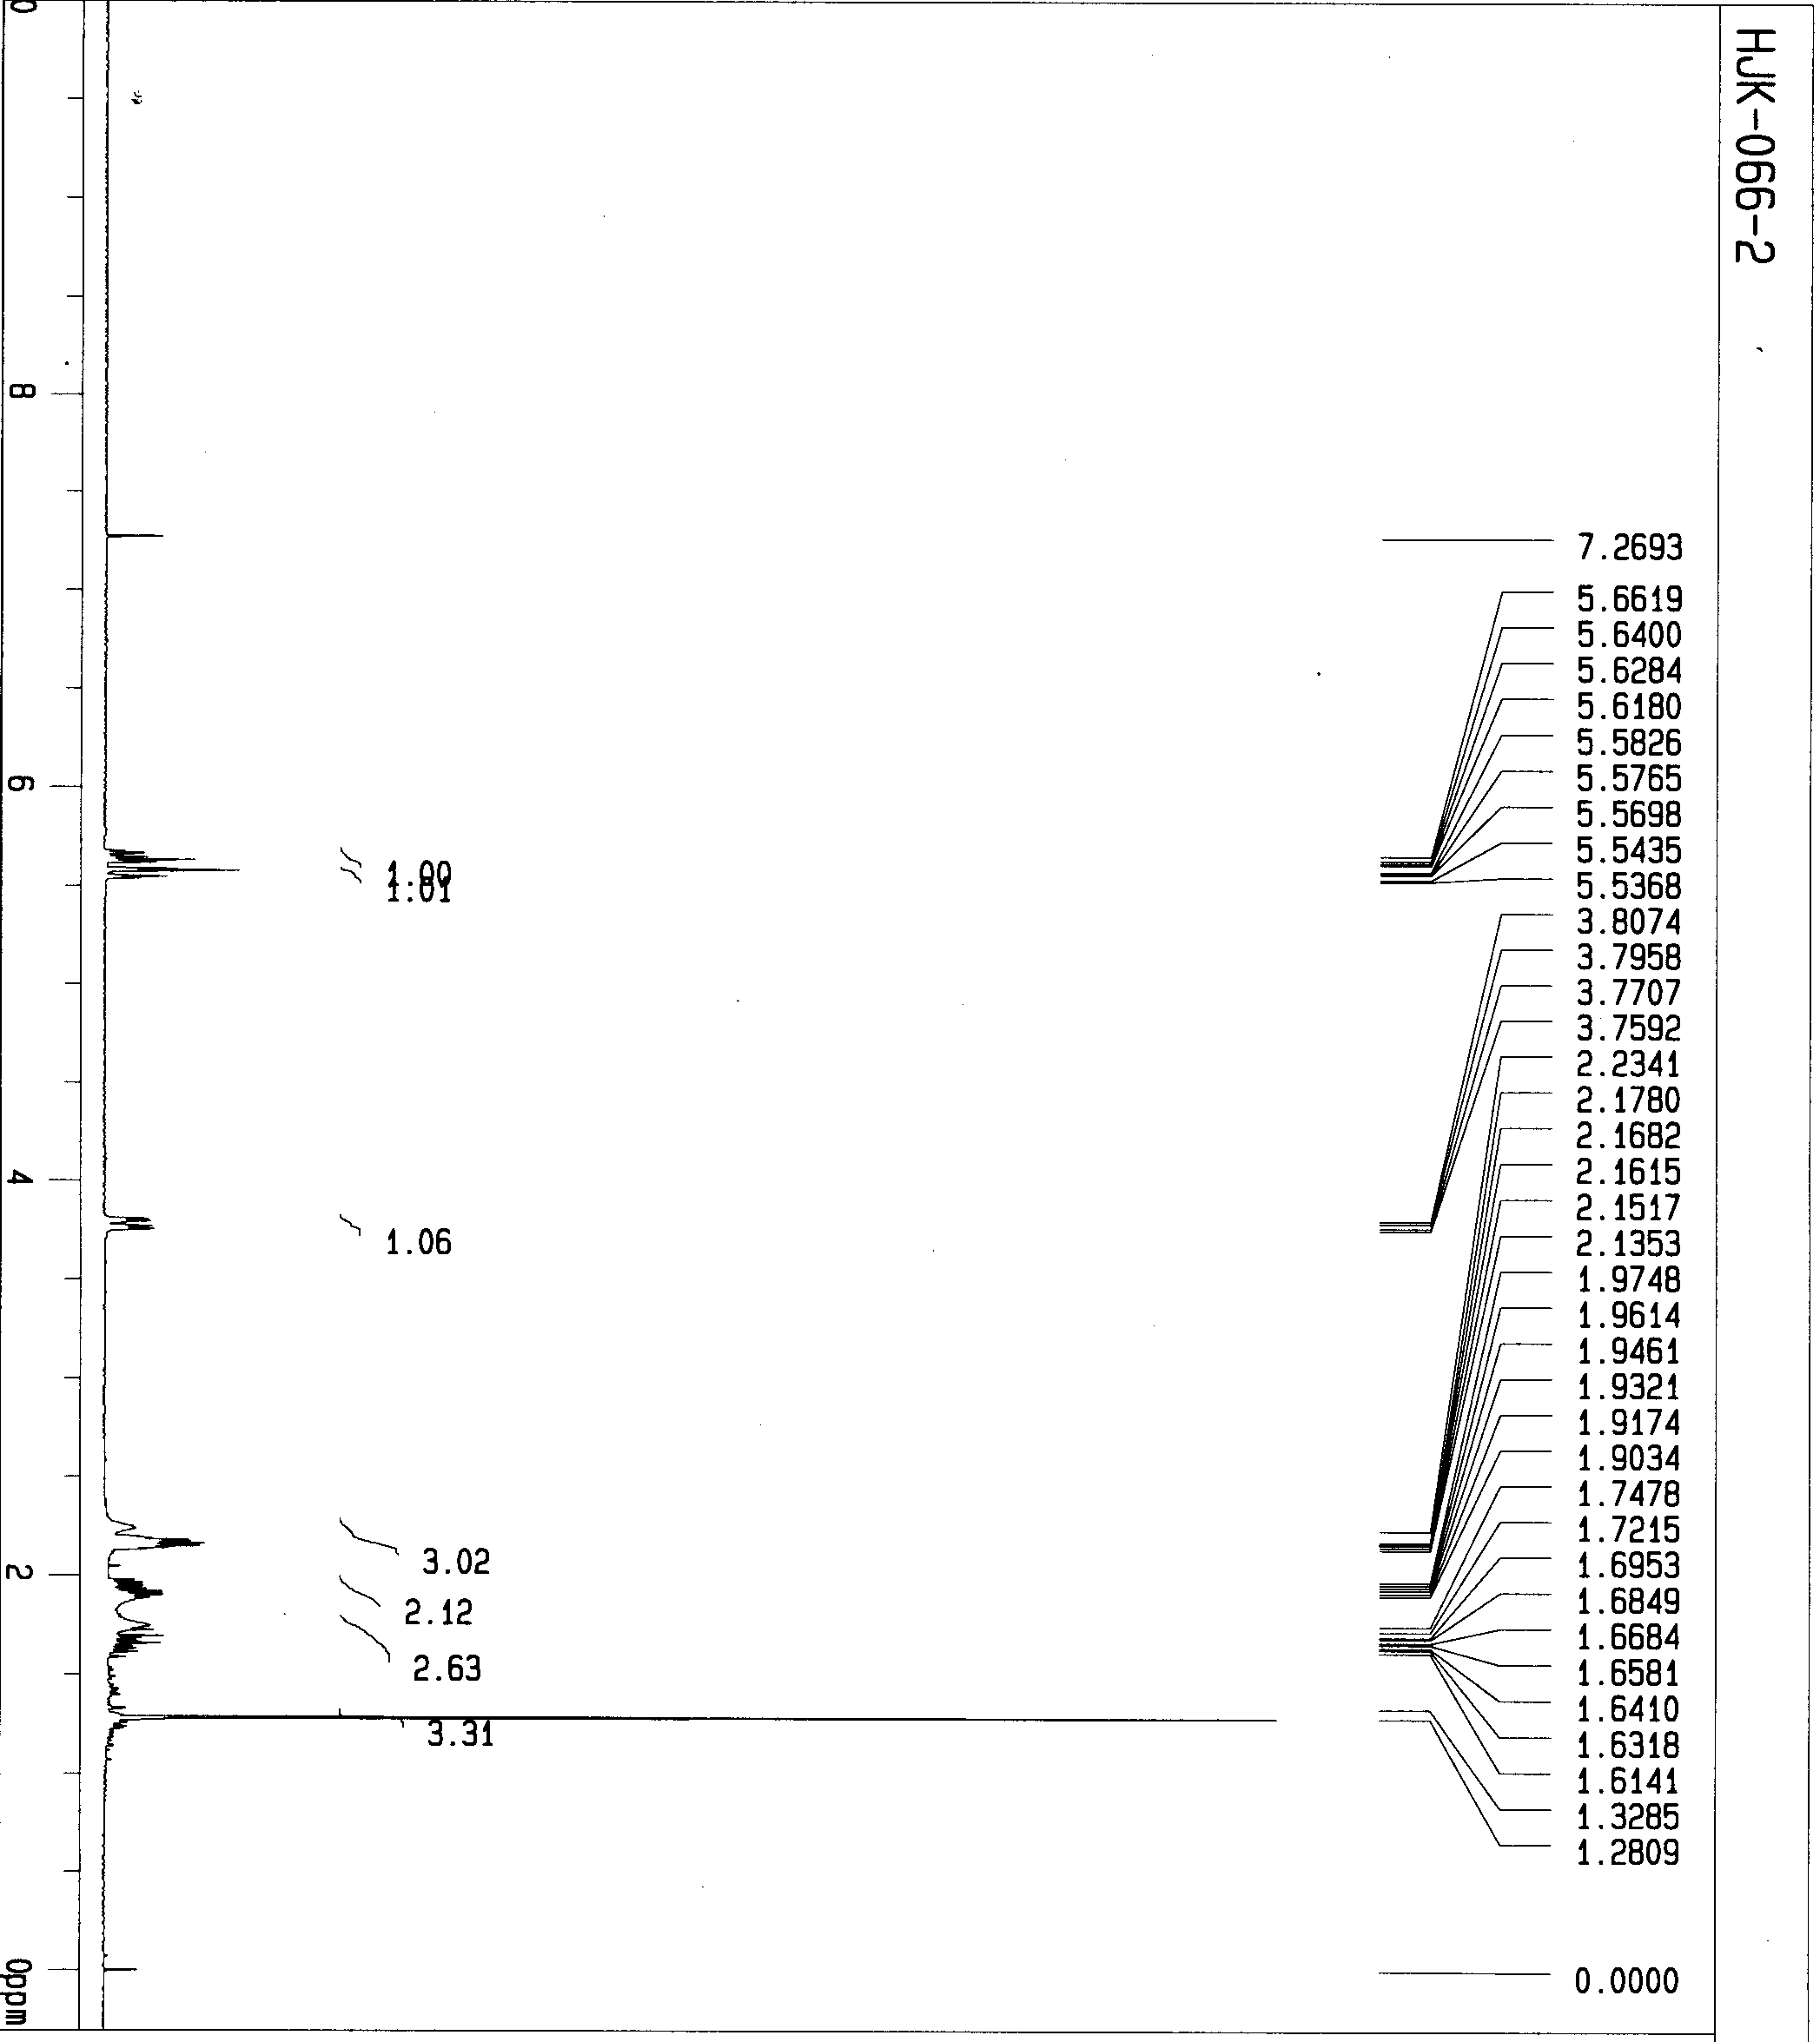
minor isomer


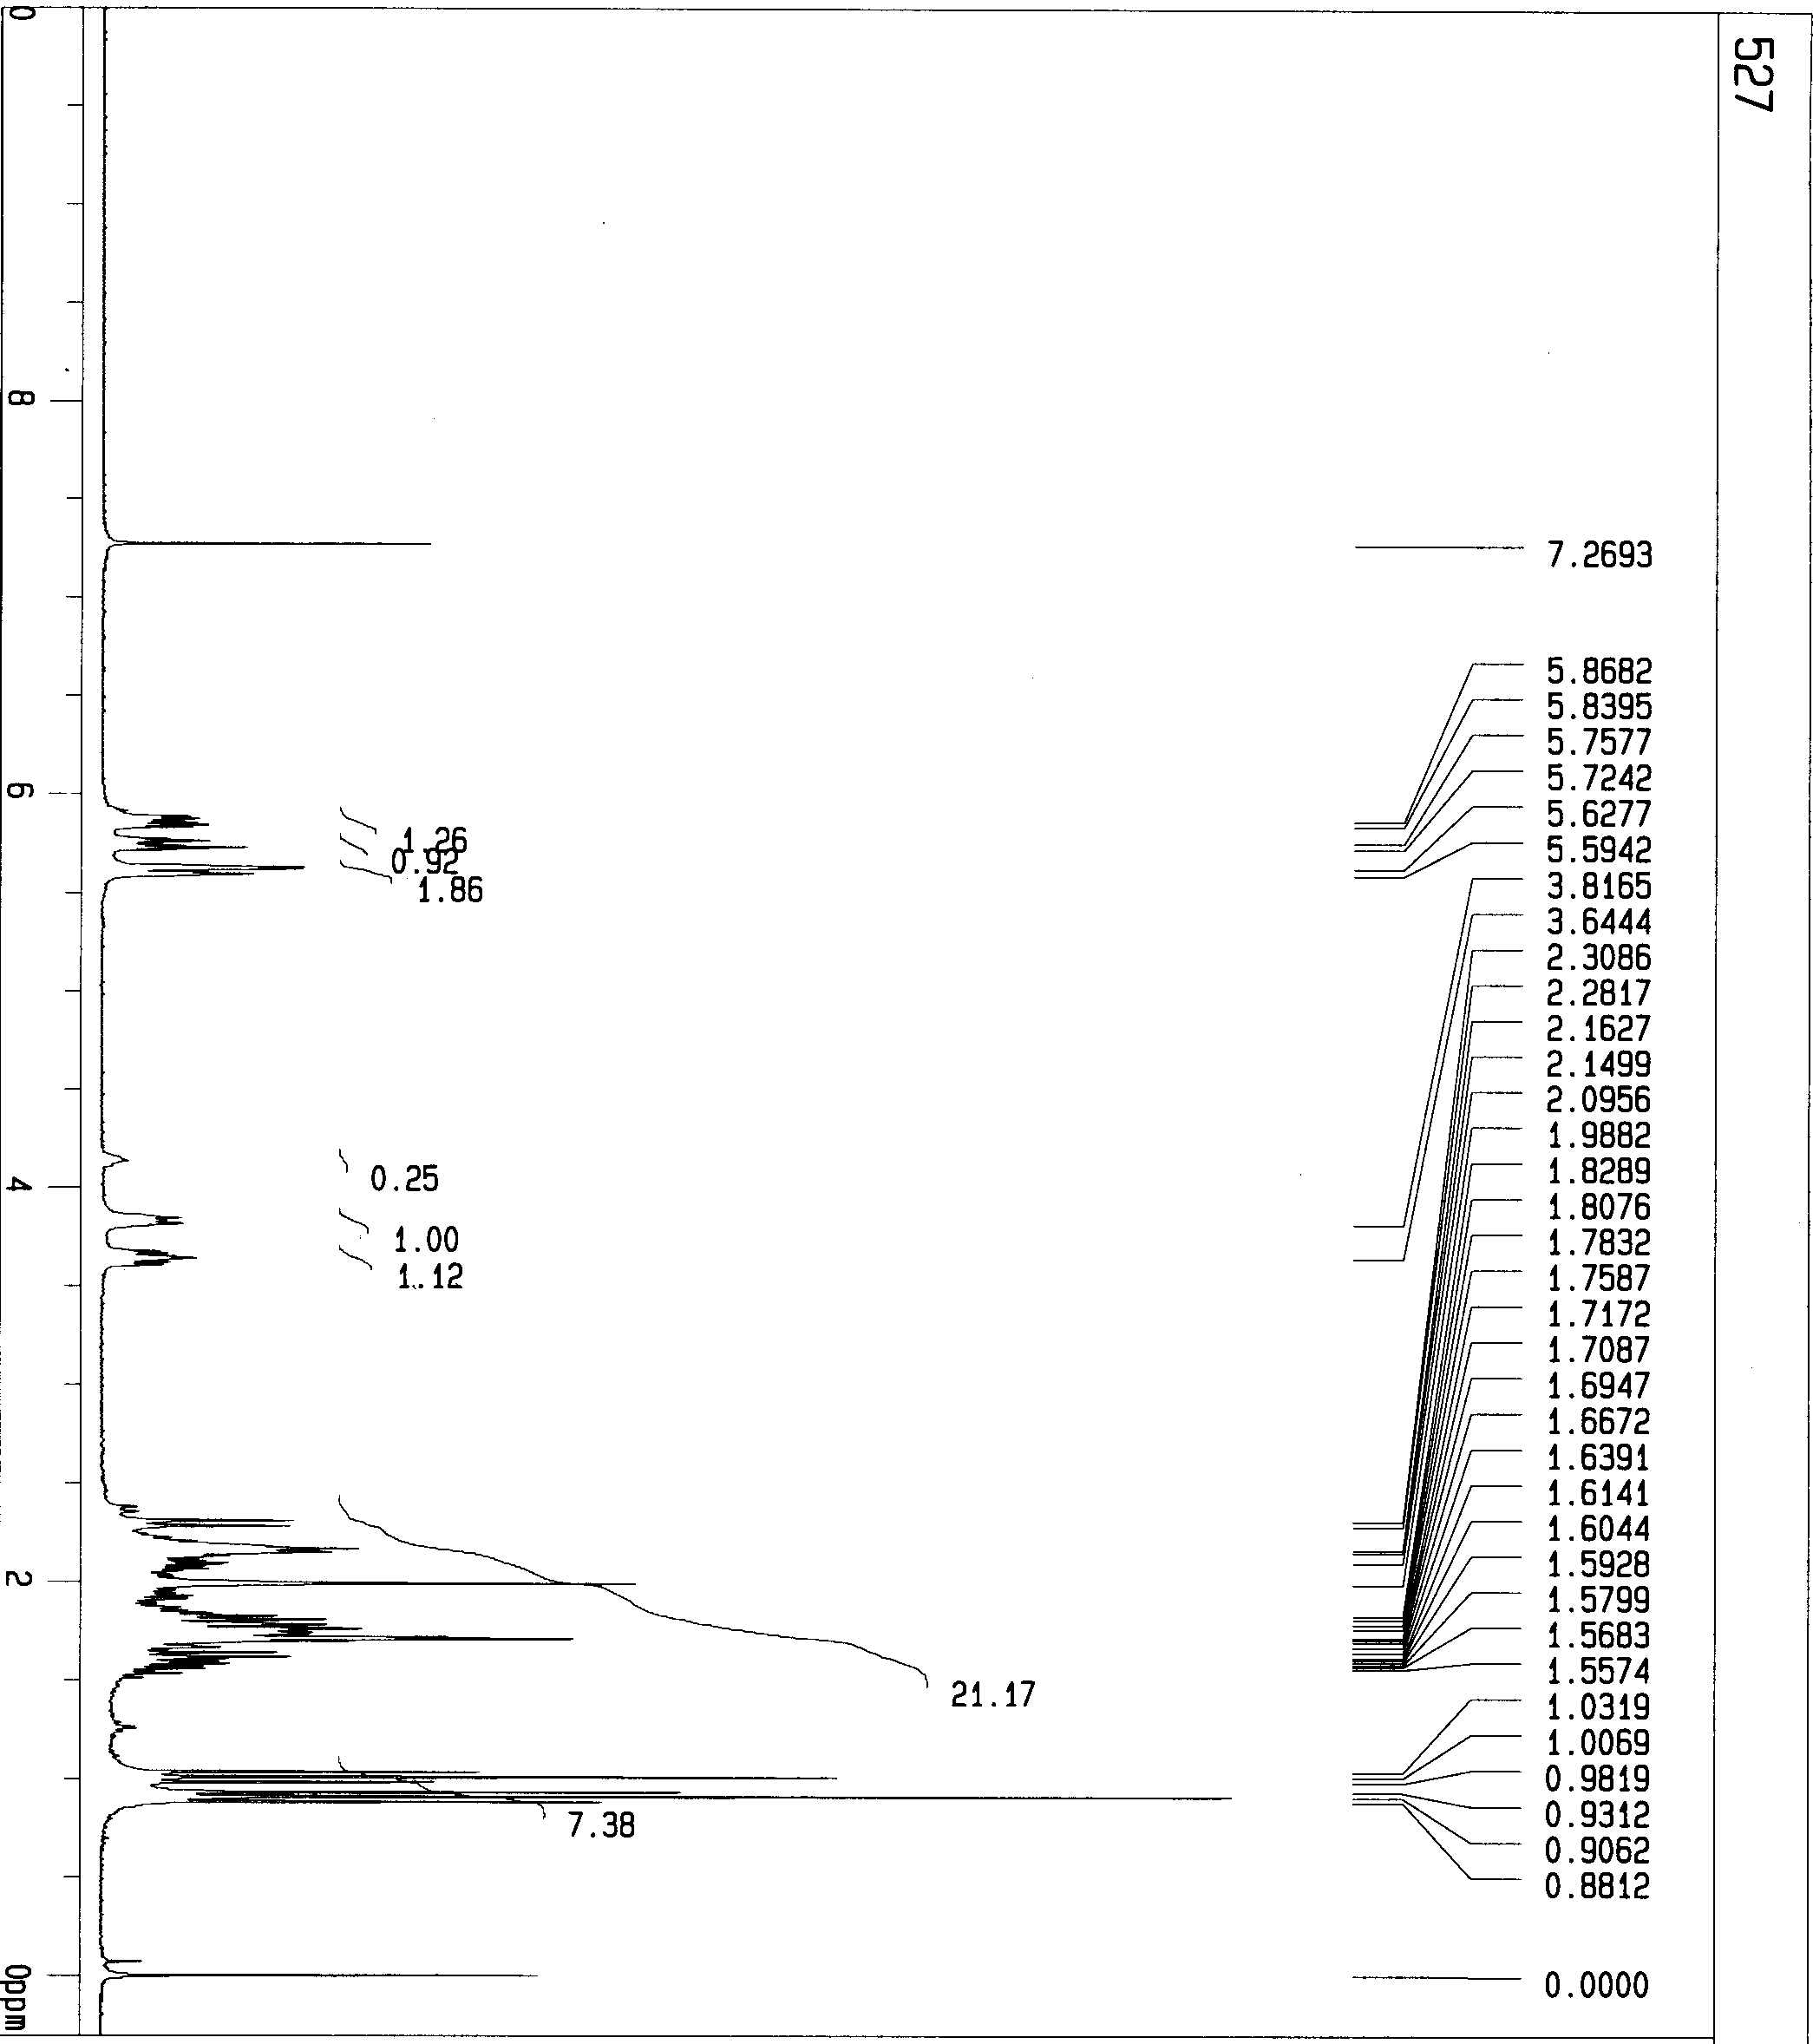
a 4:3 mixture of diastereomers

major isomer


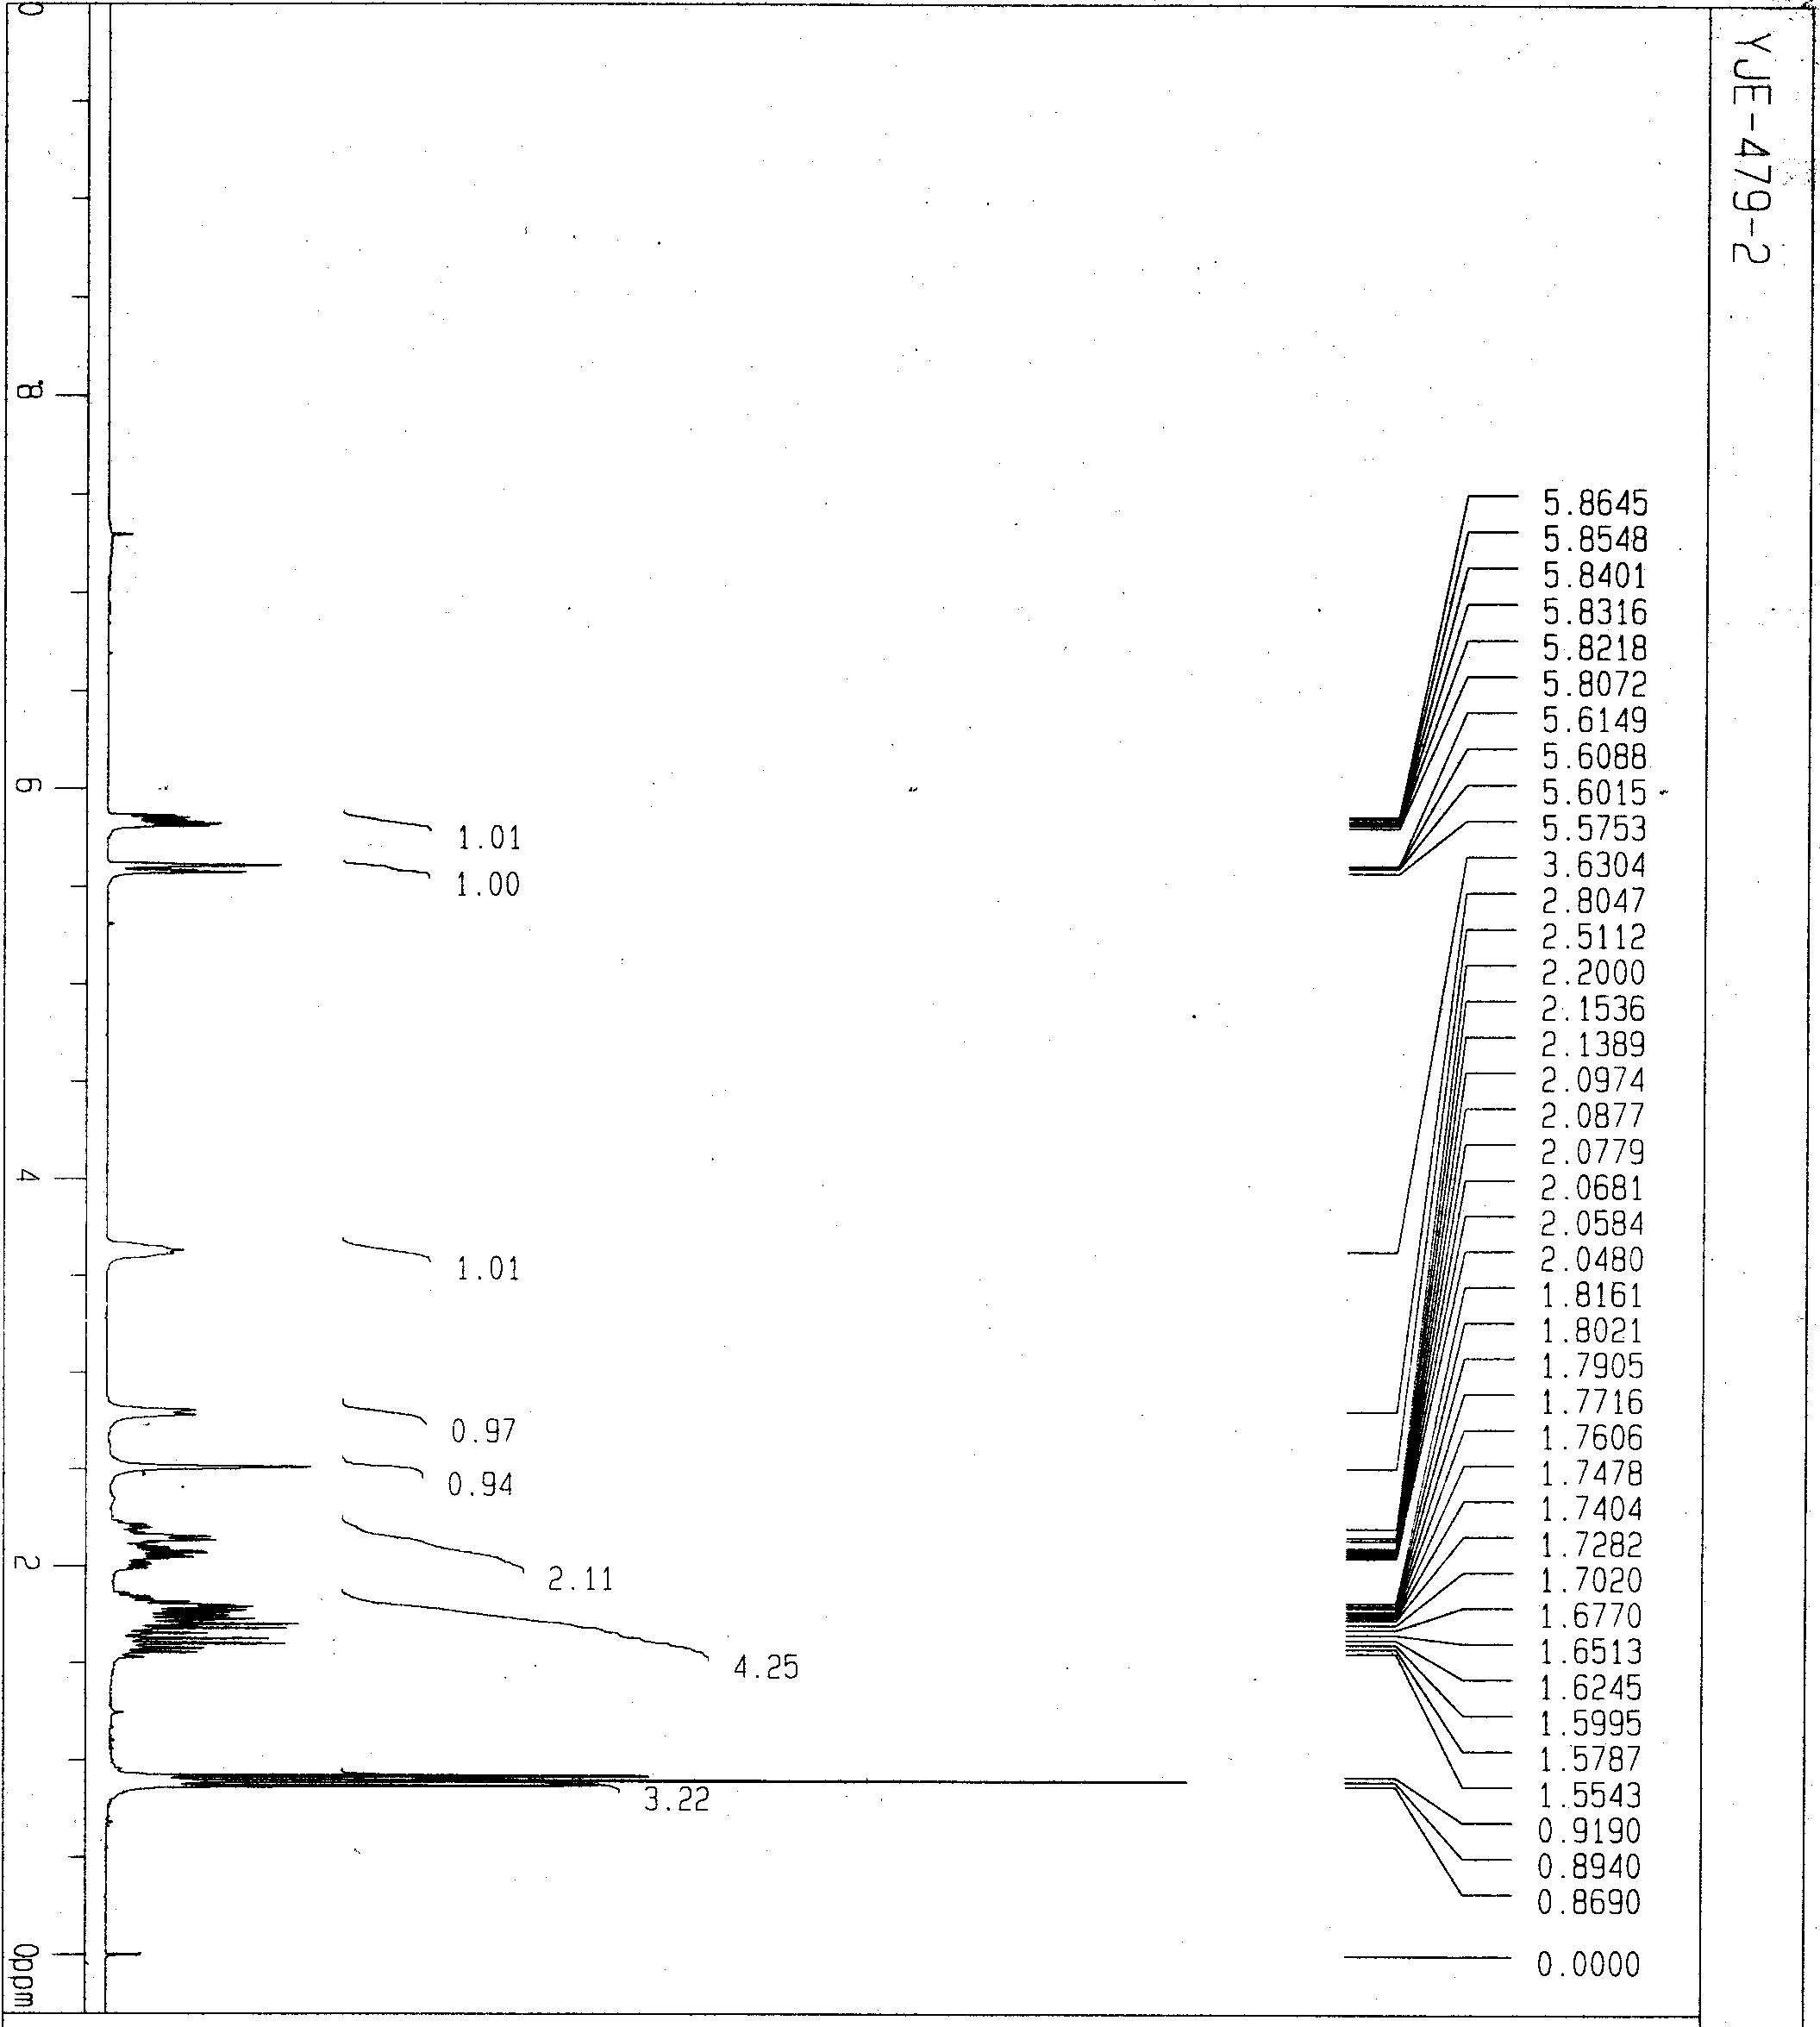


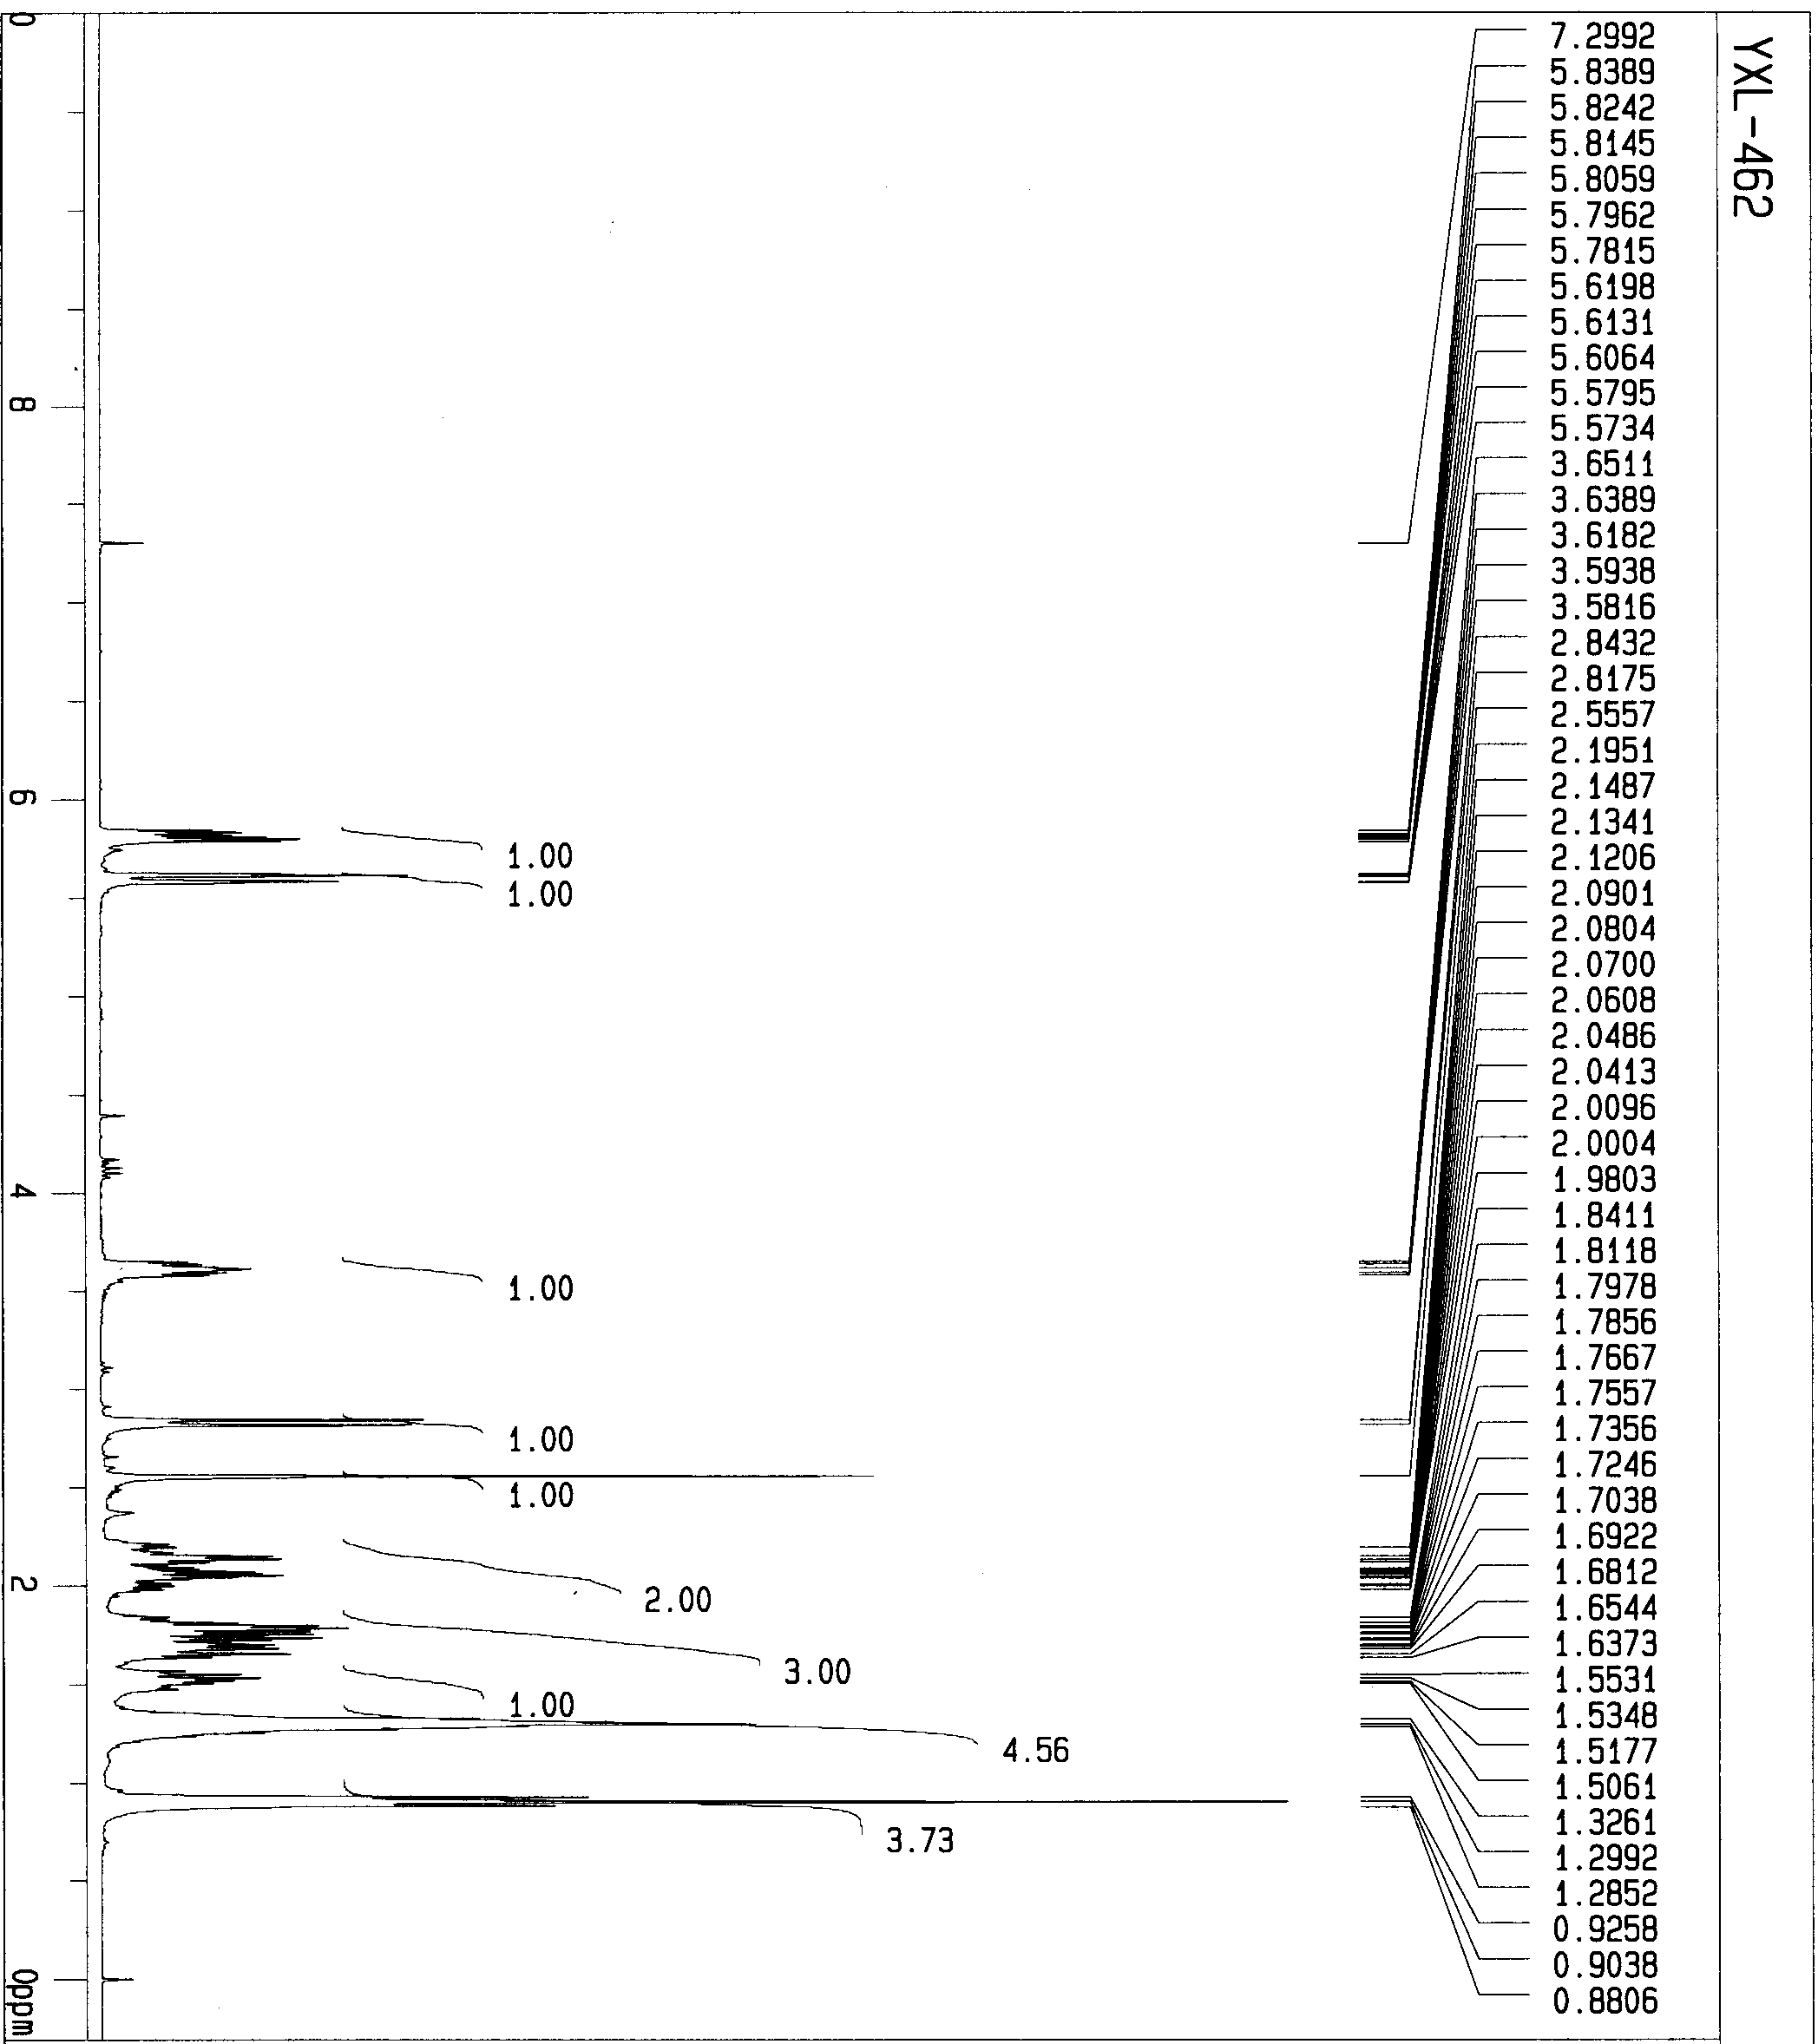


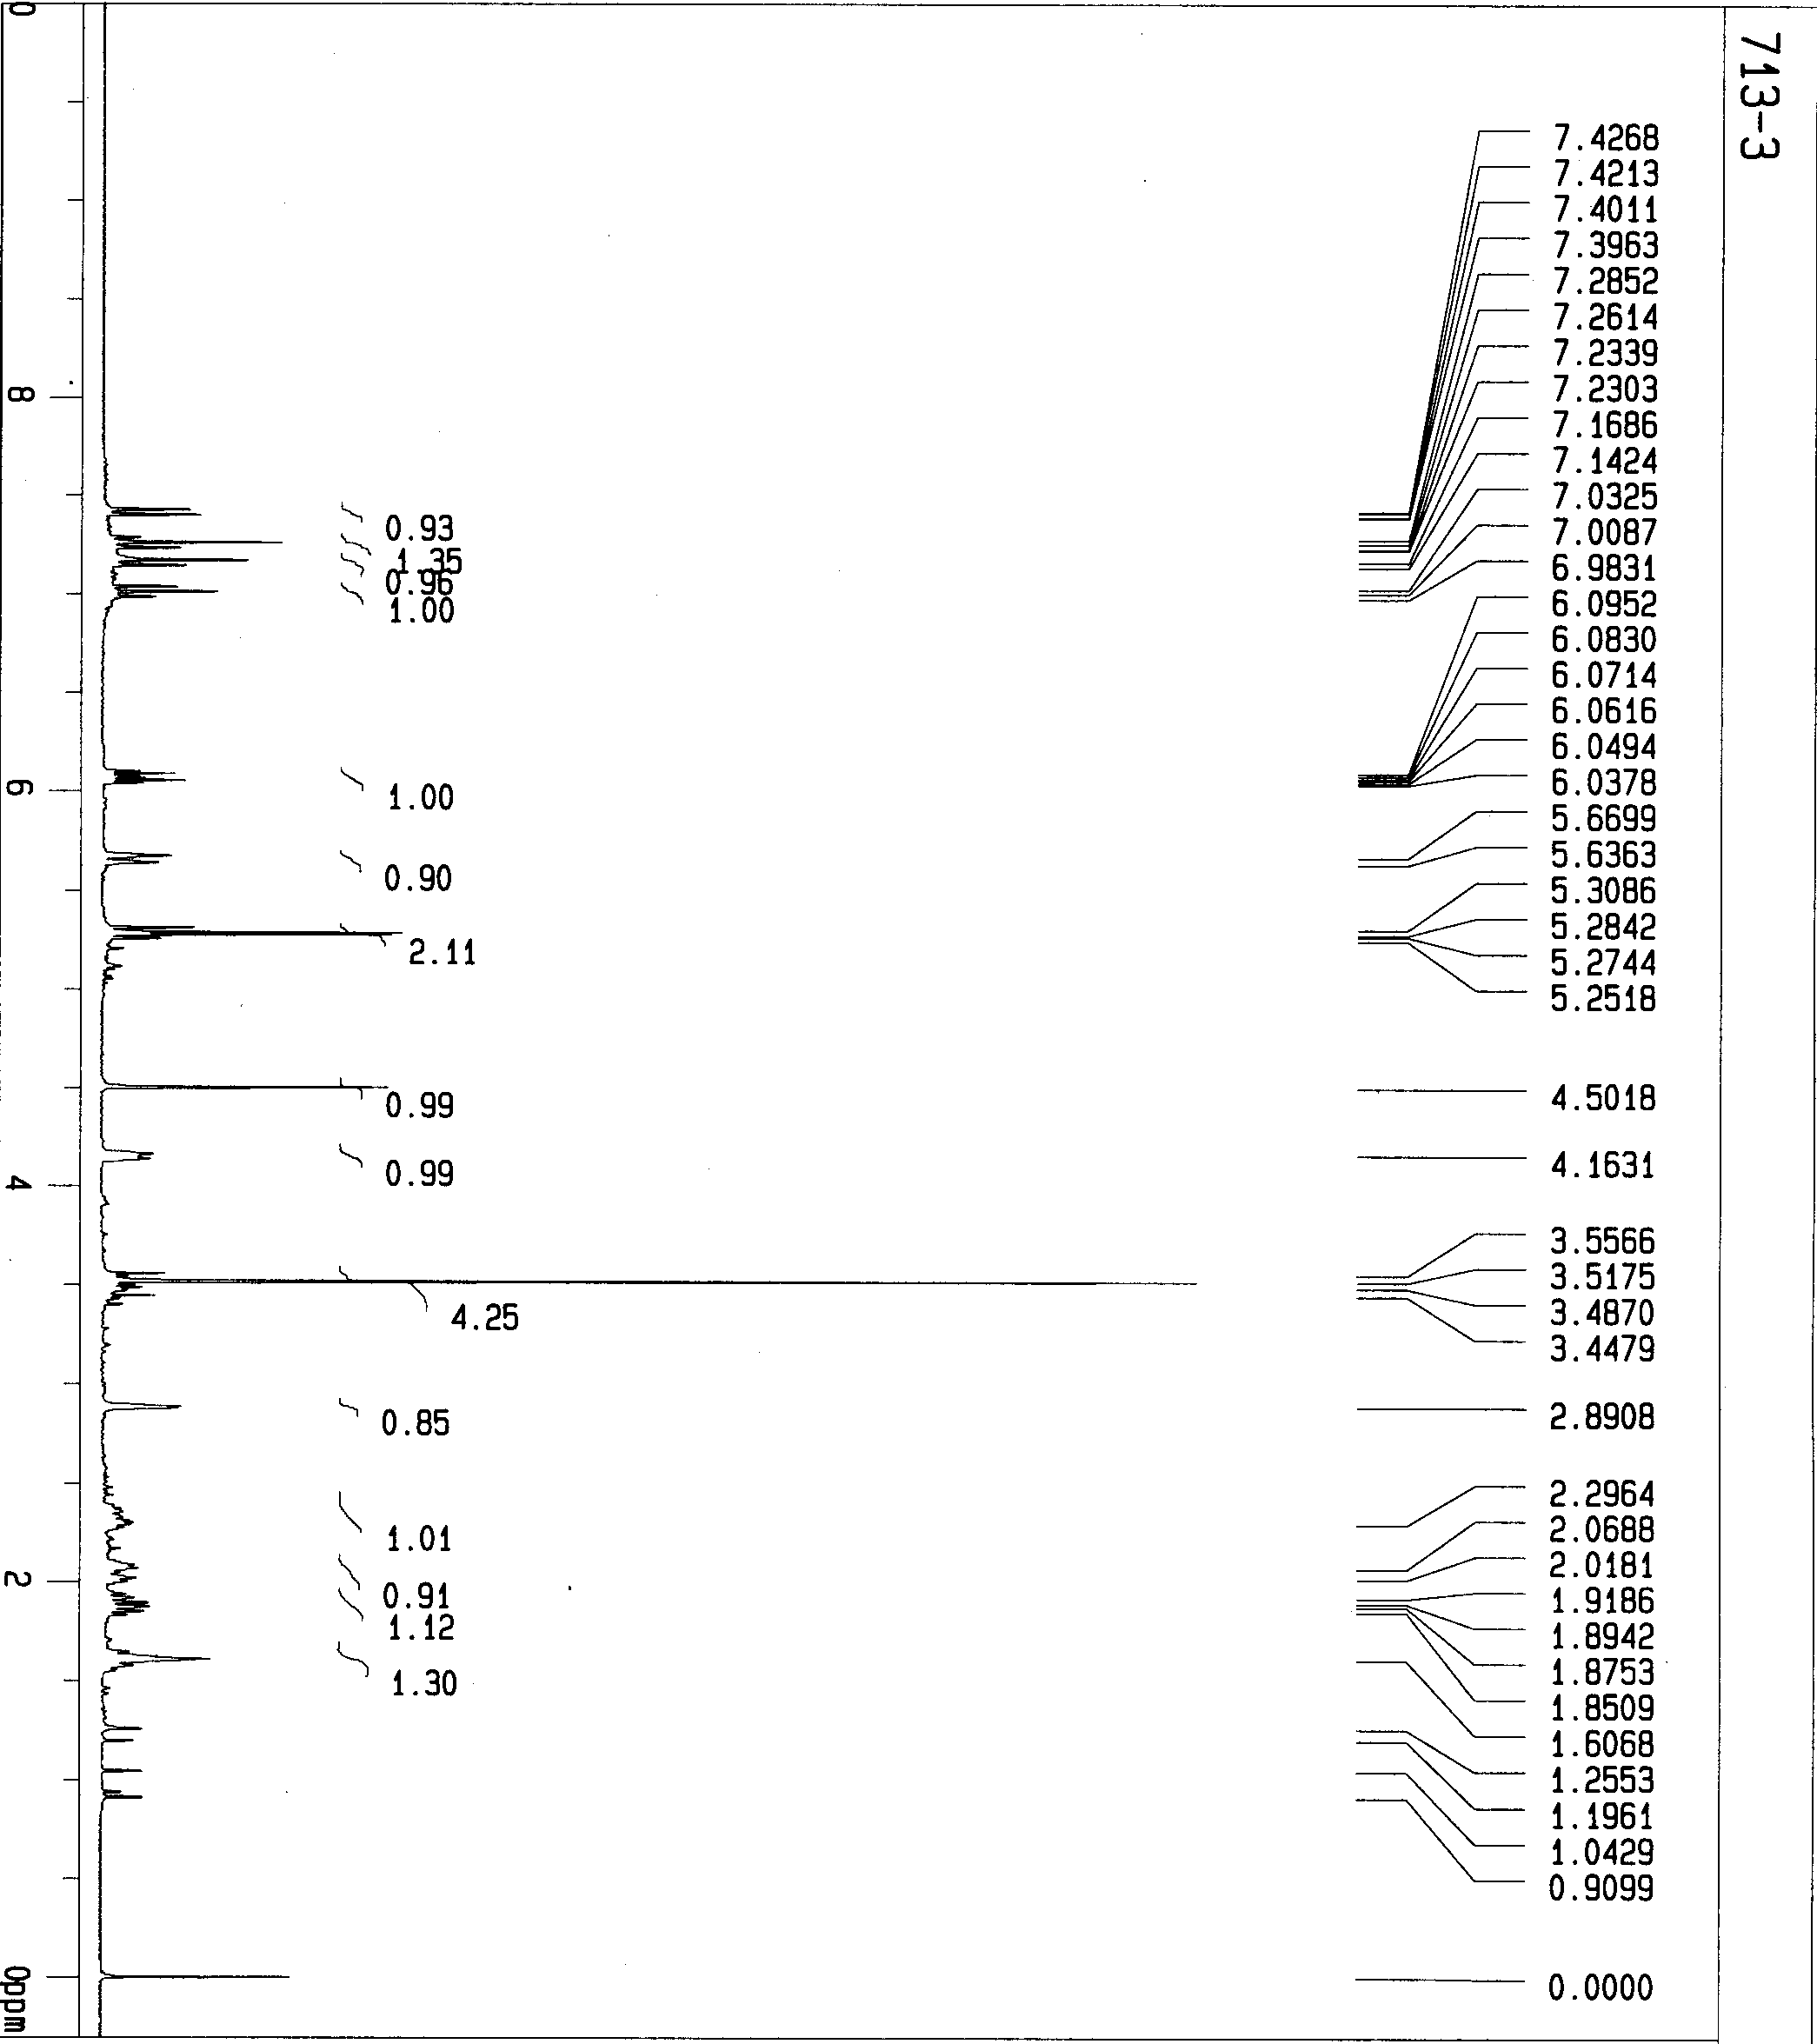


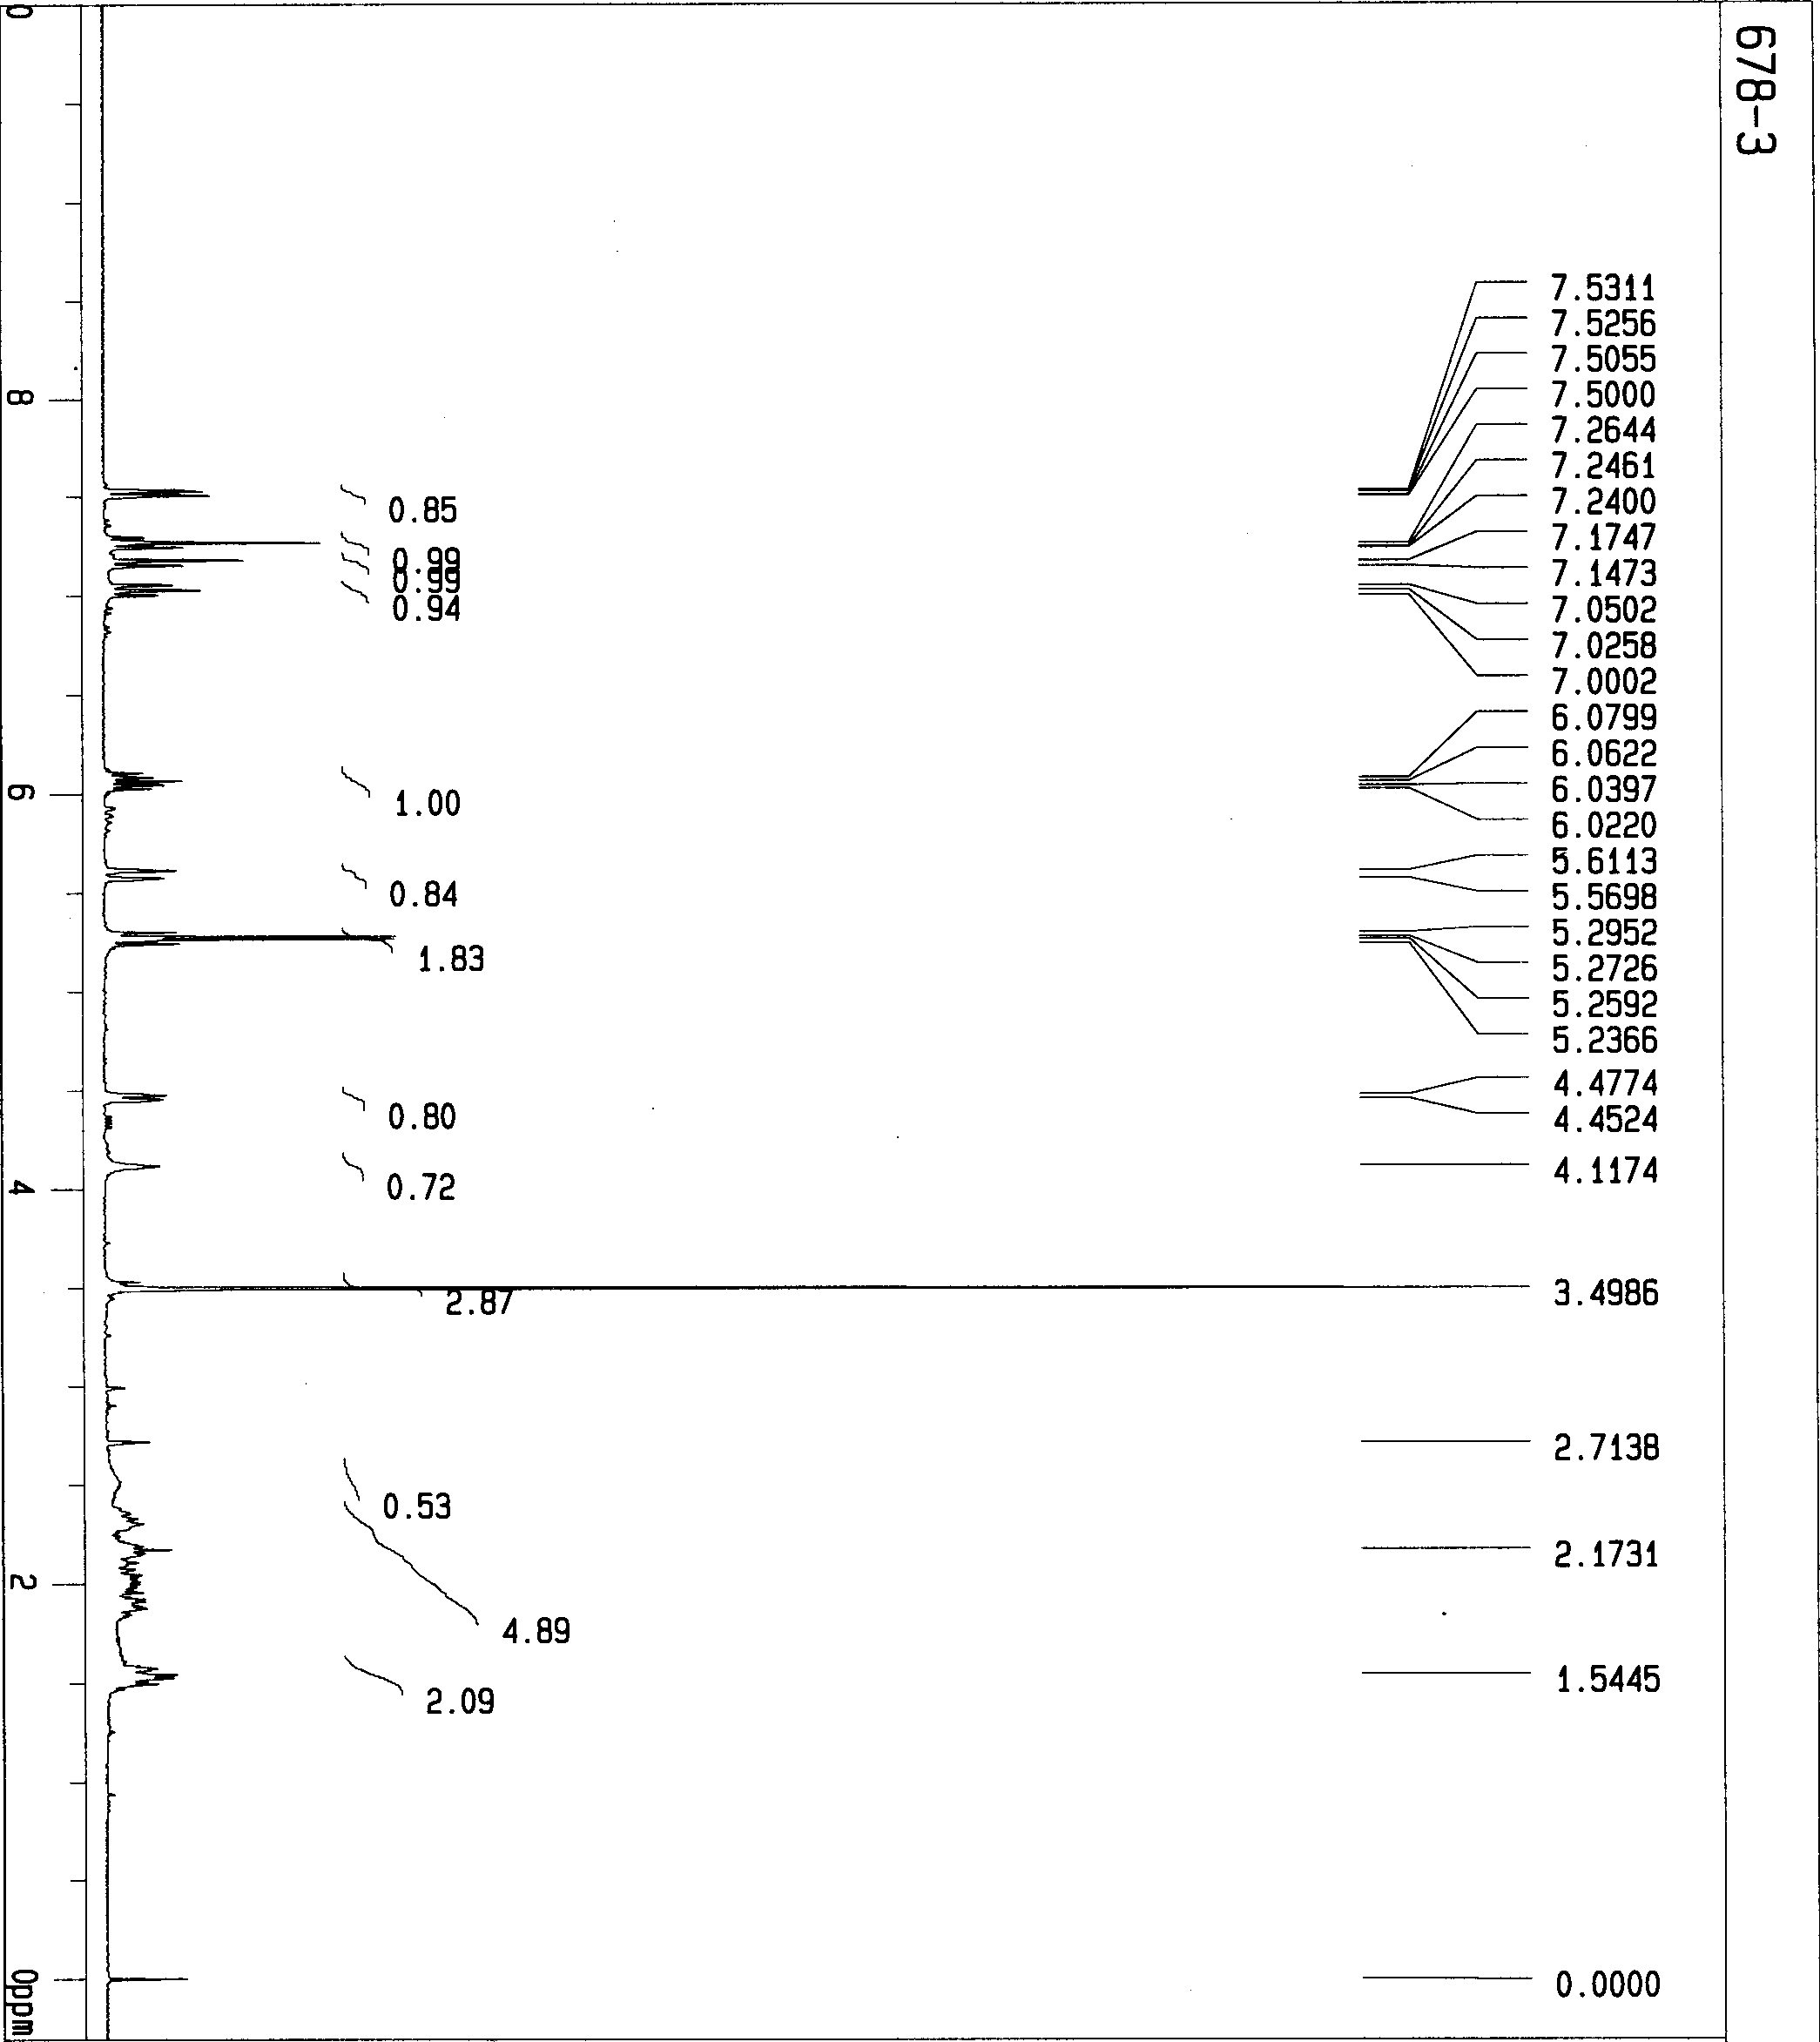


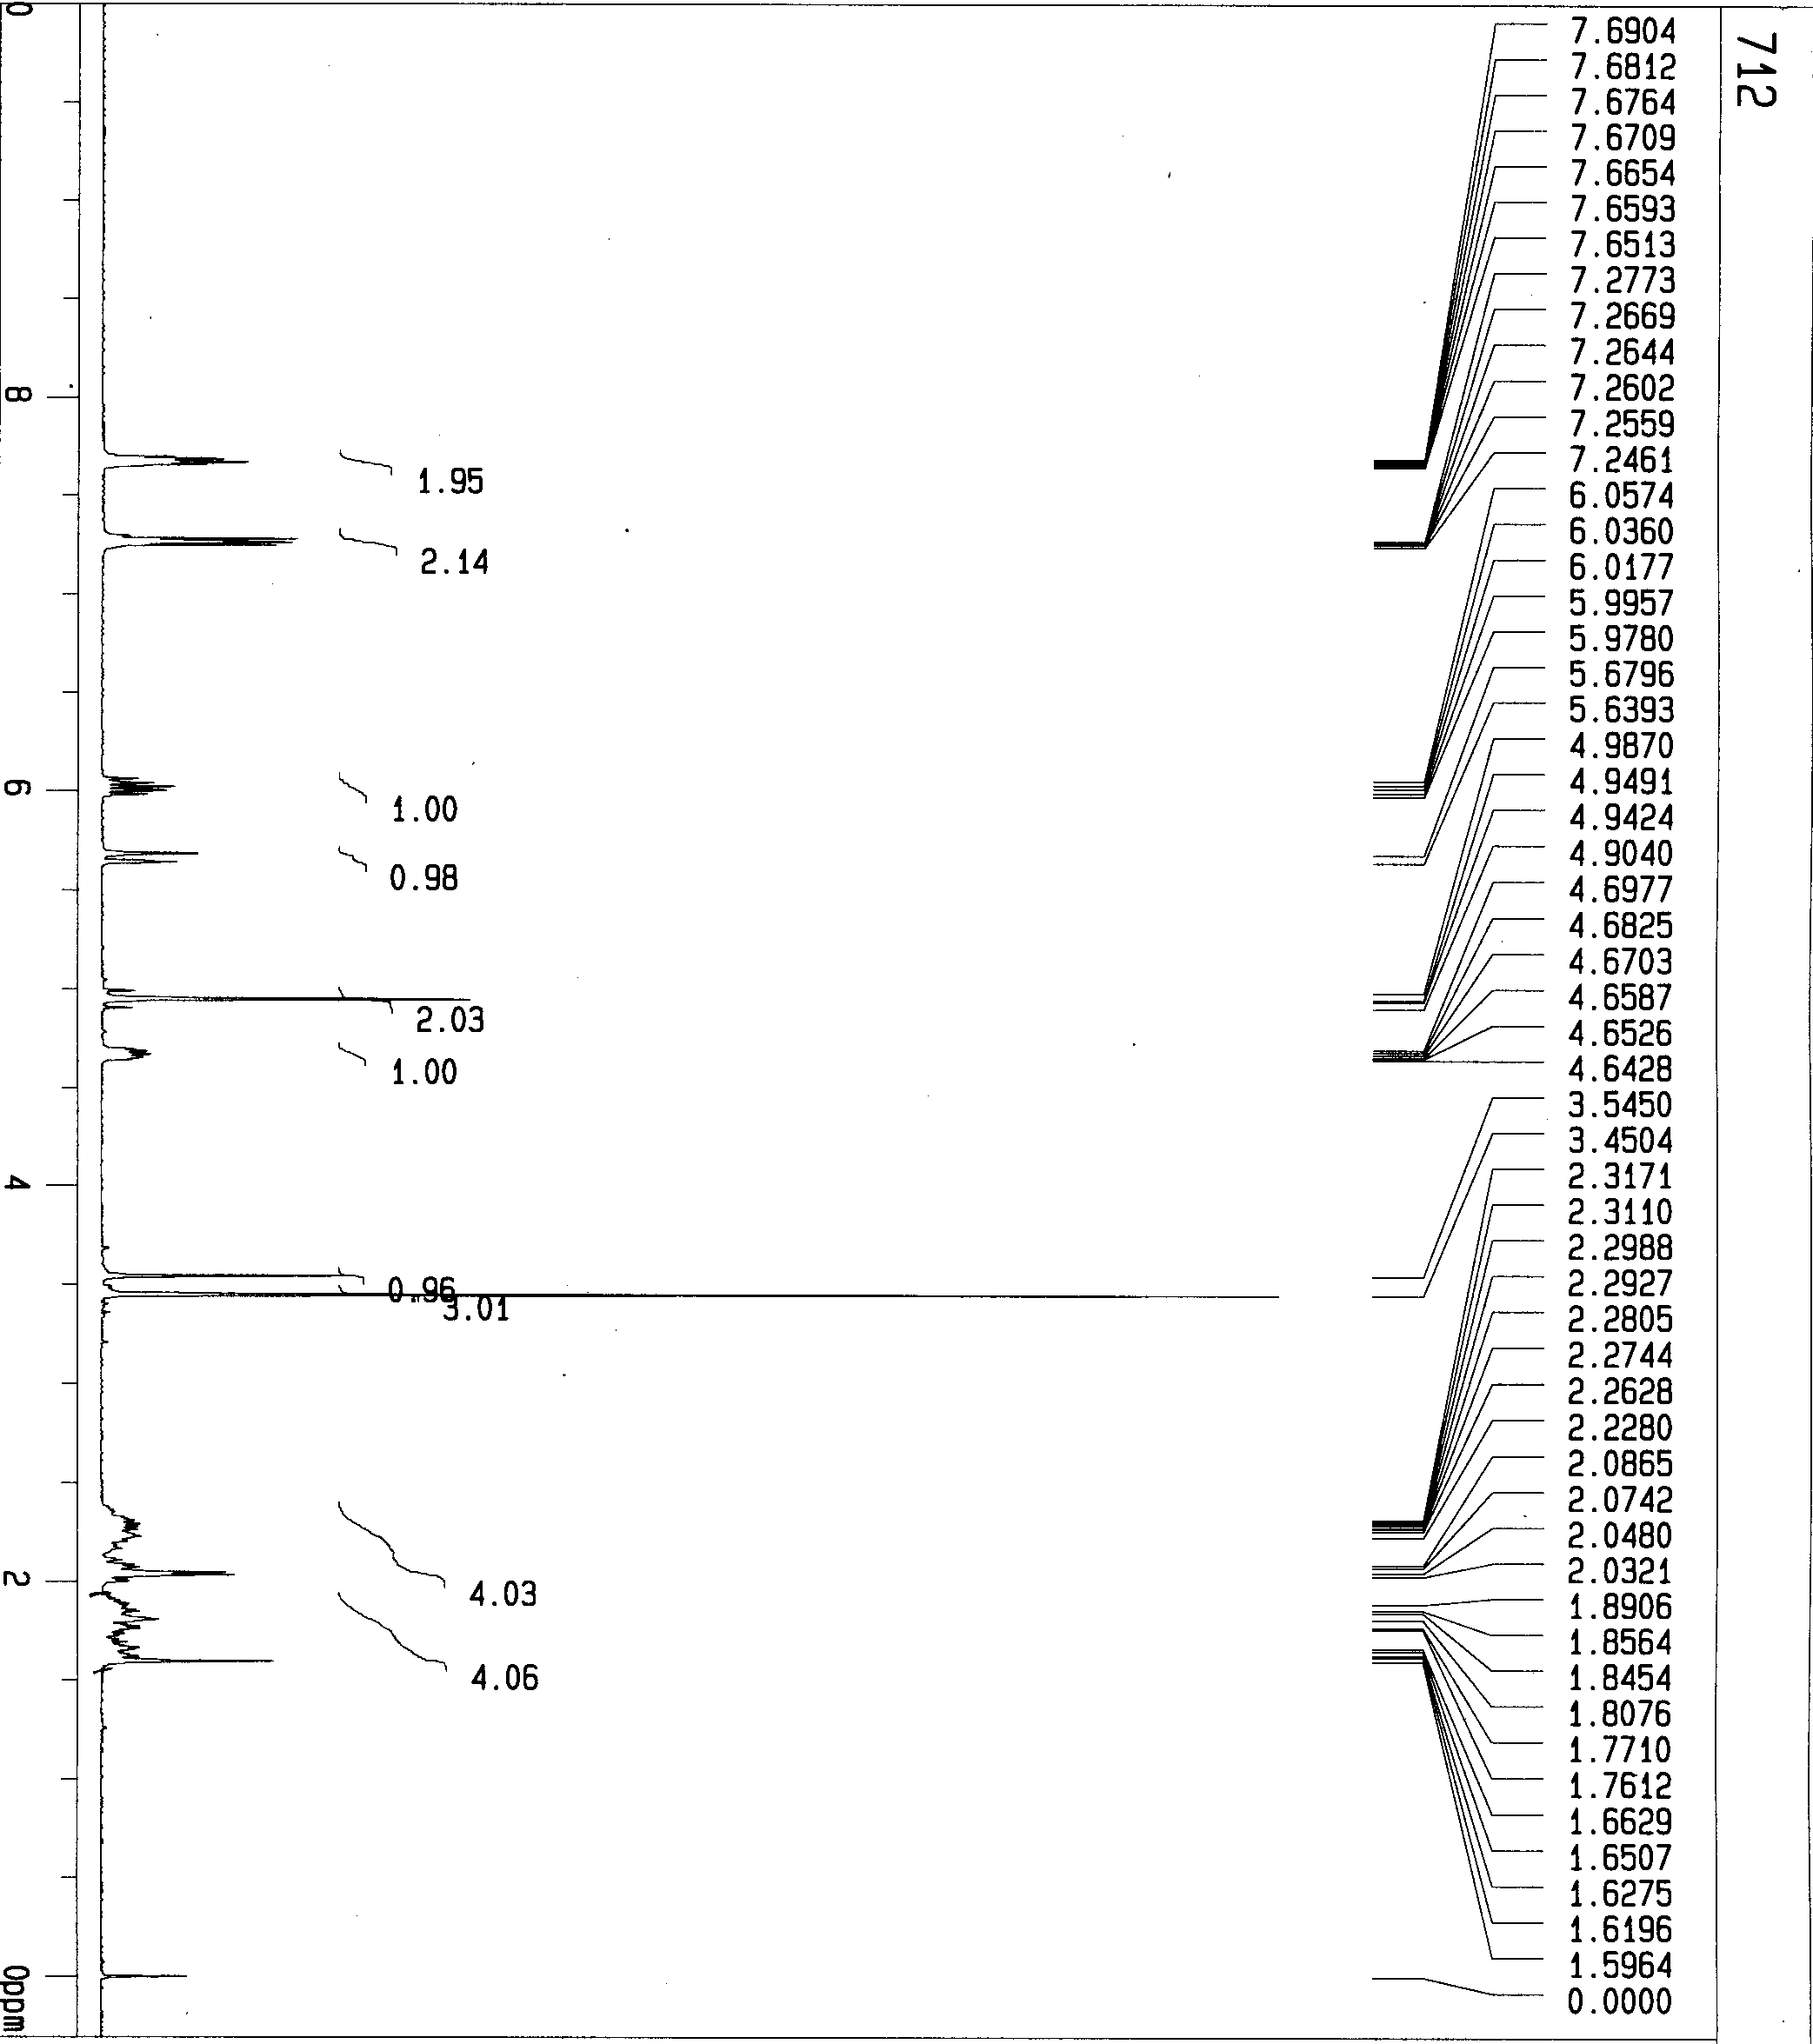


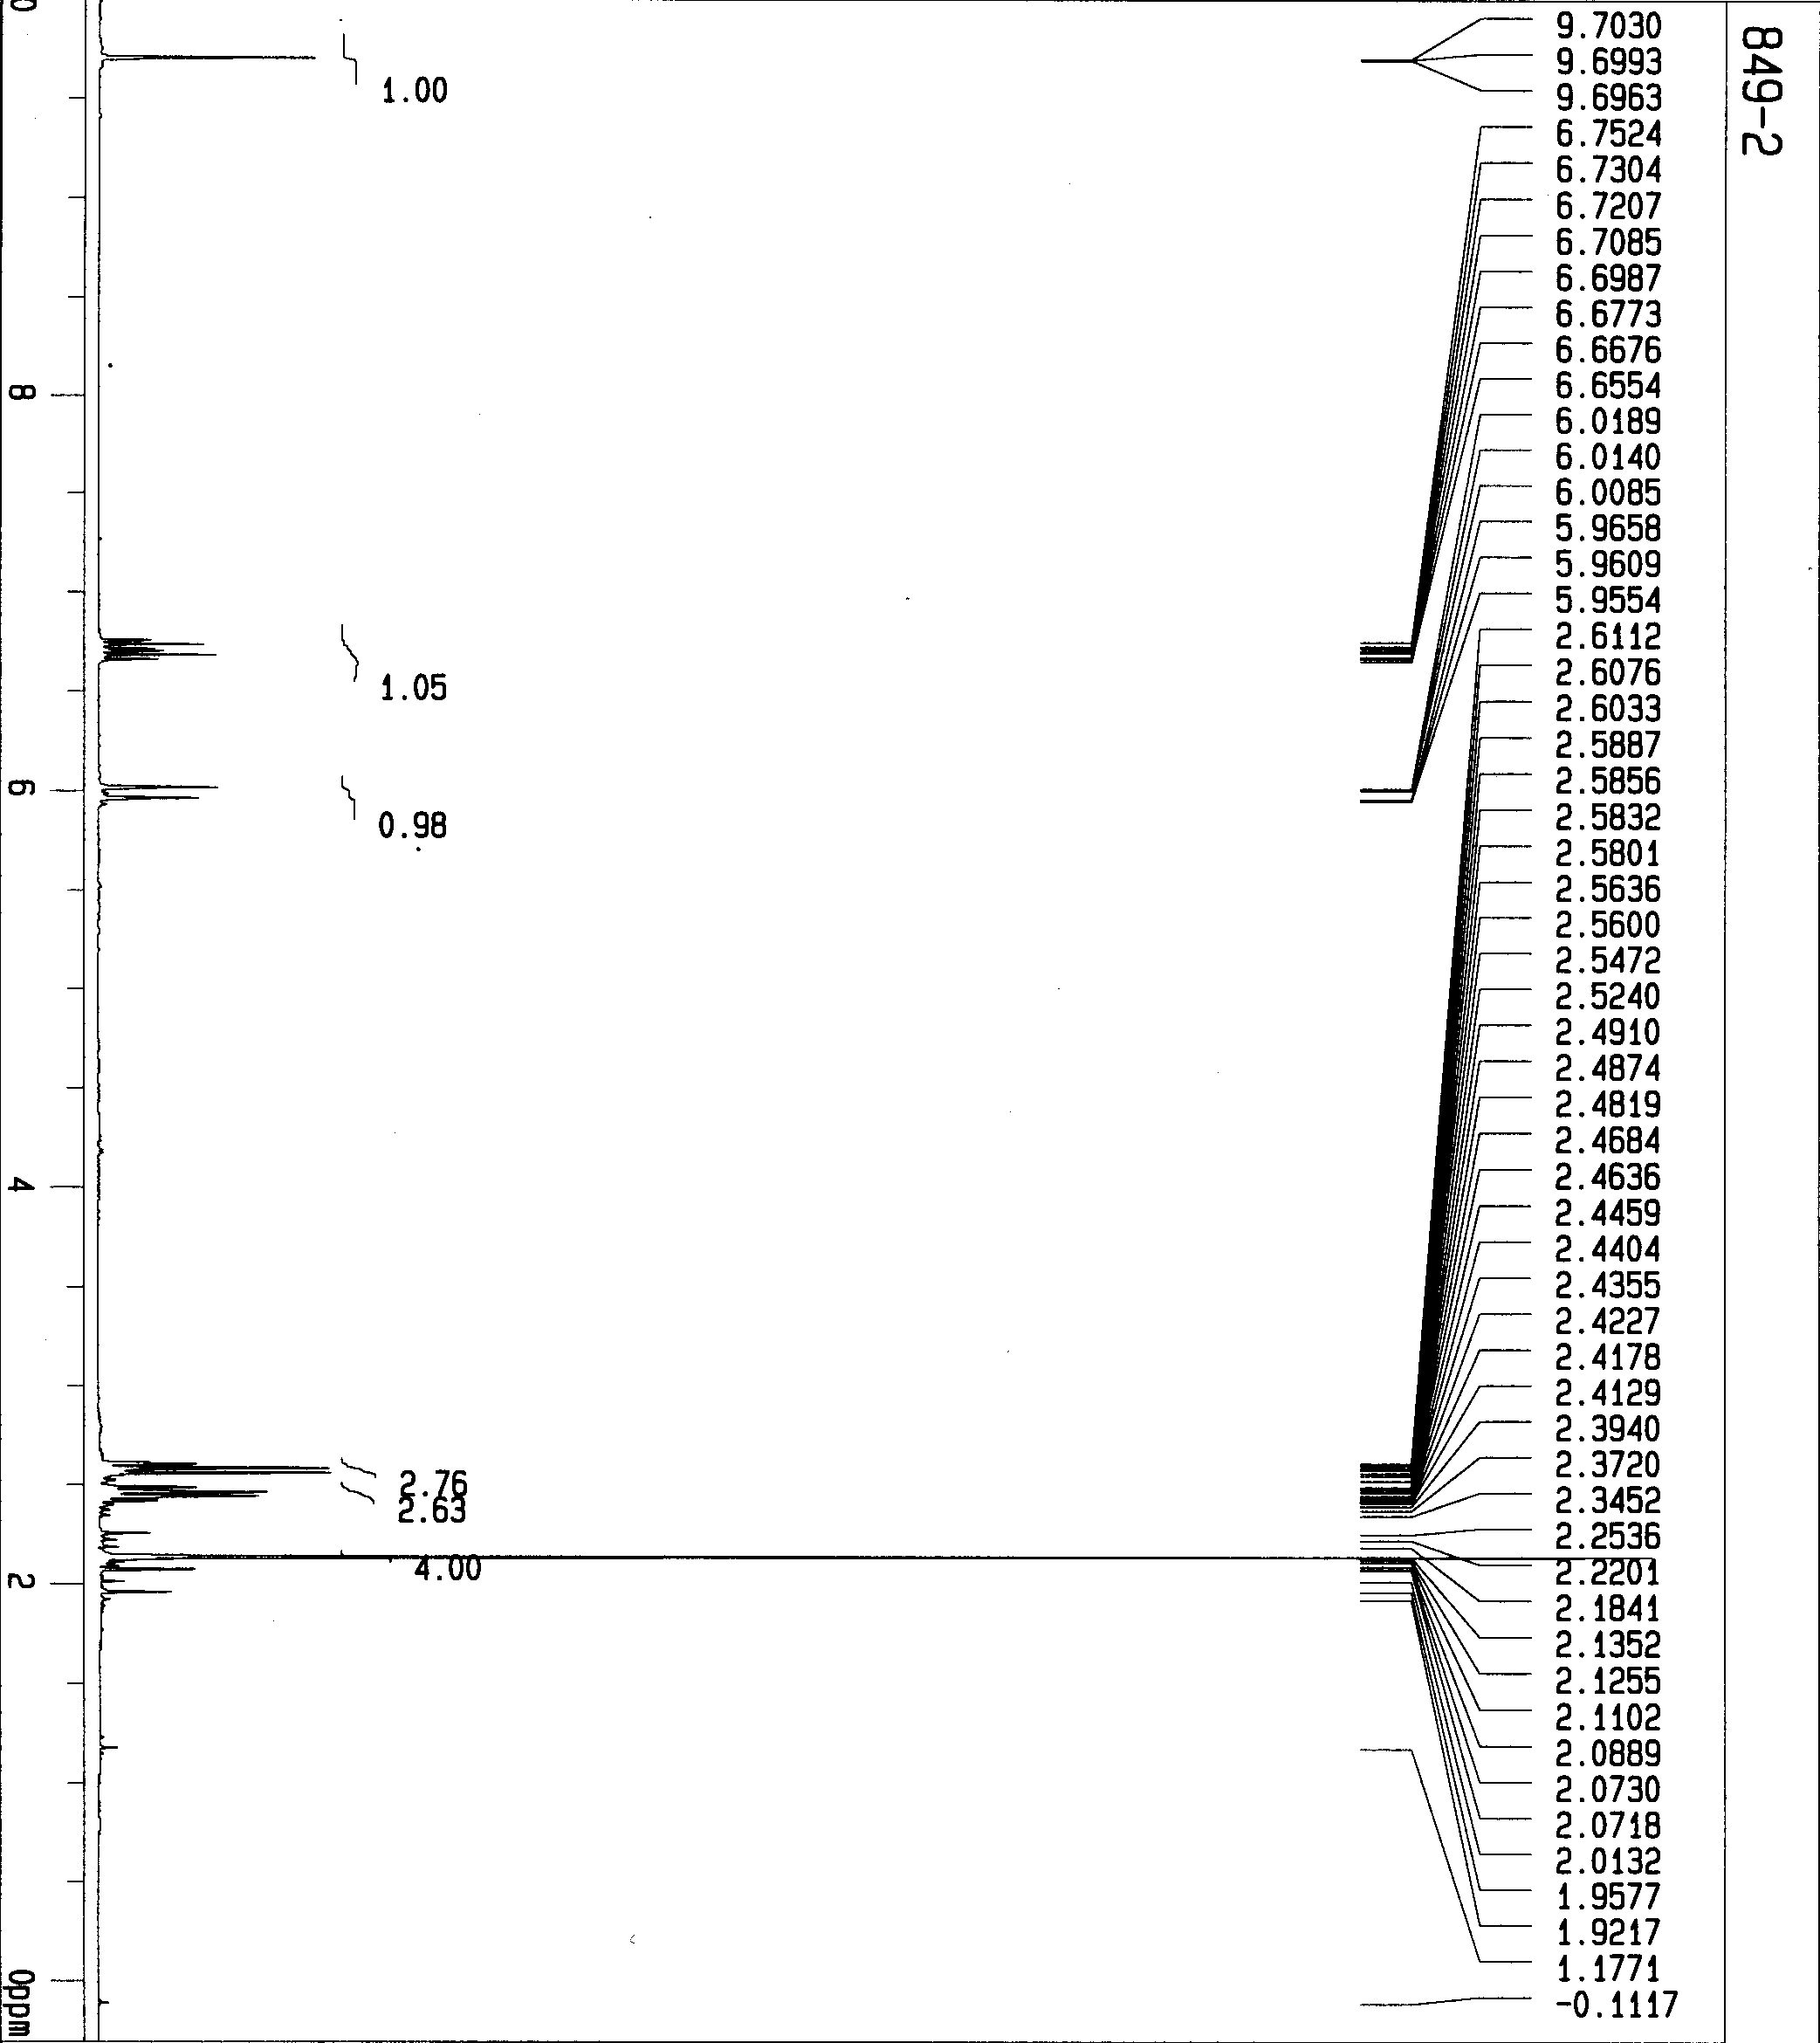


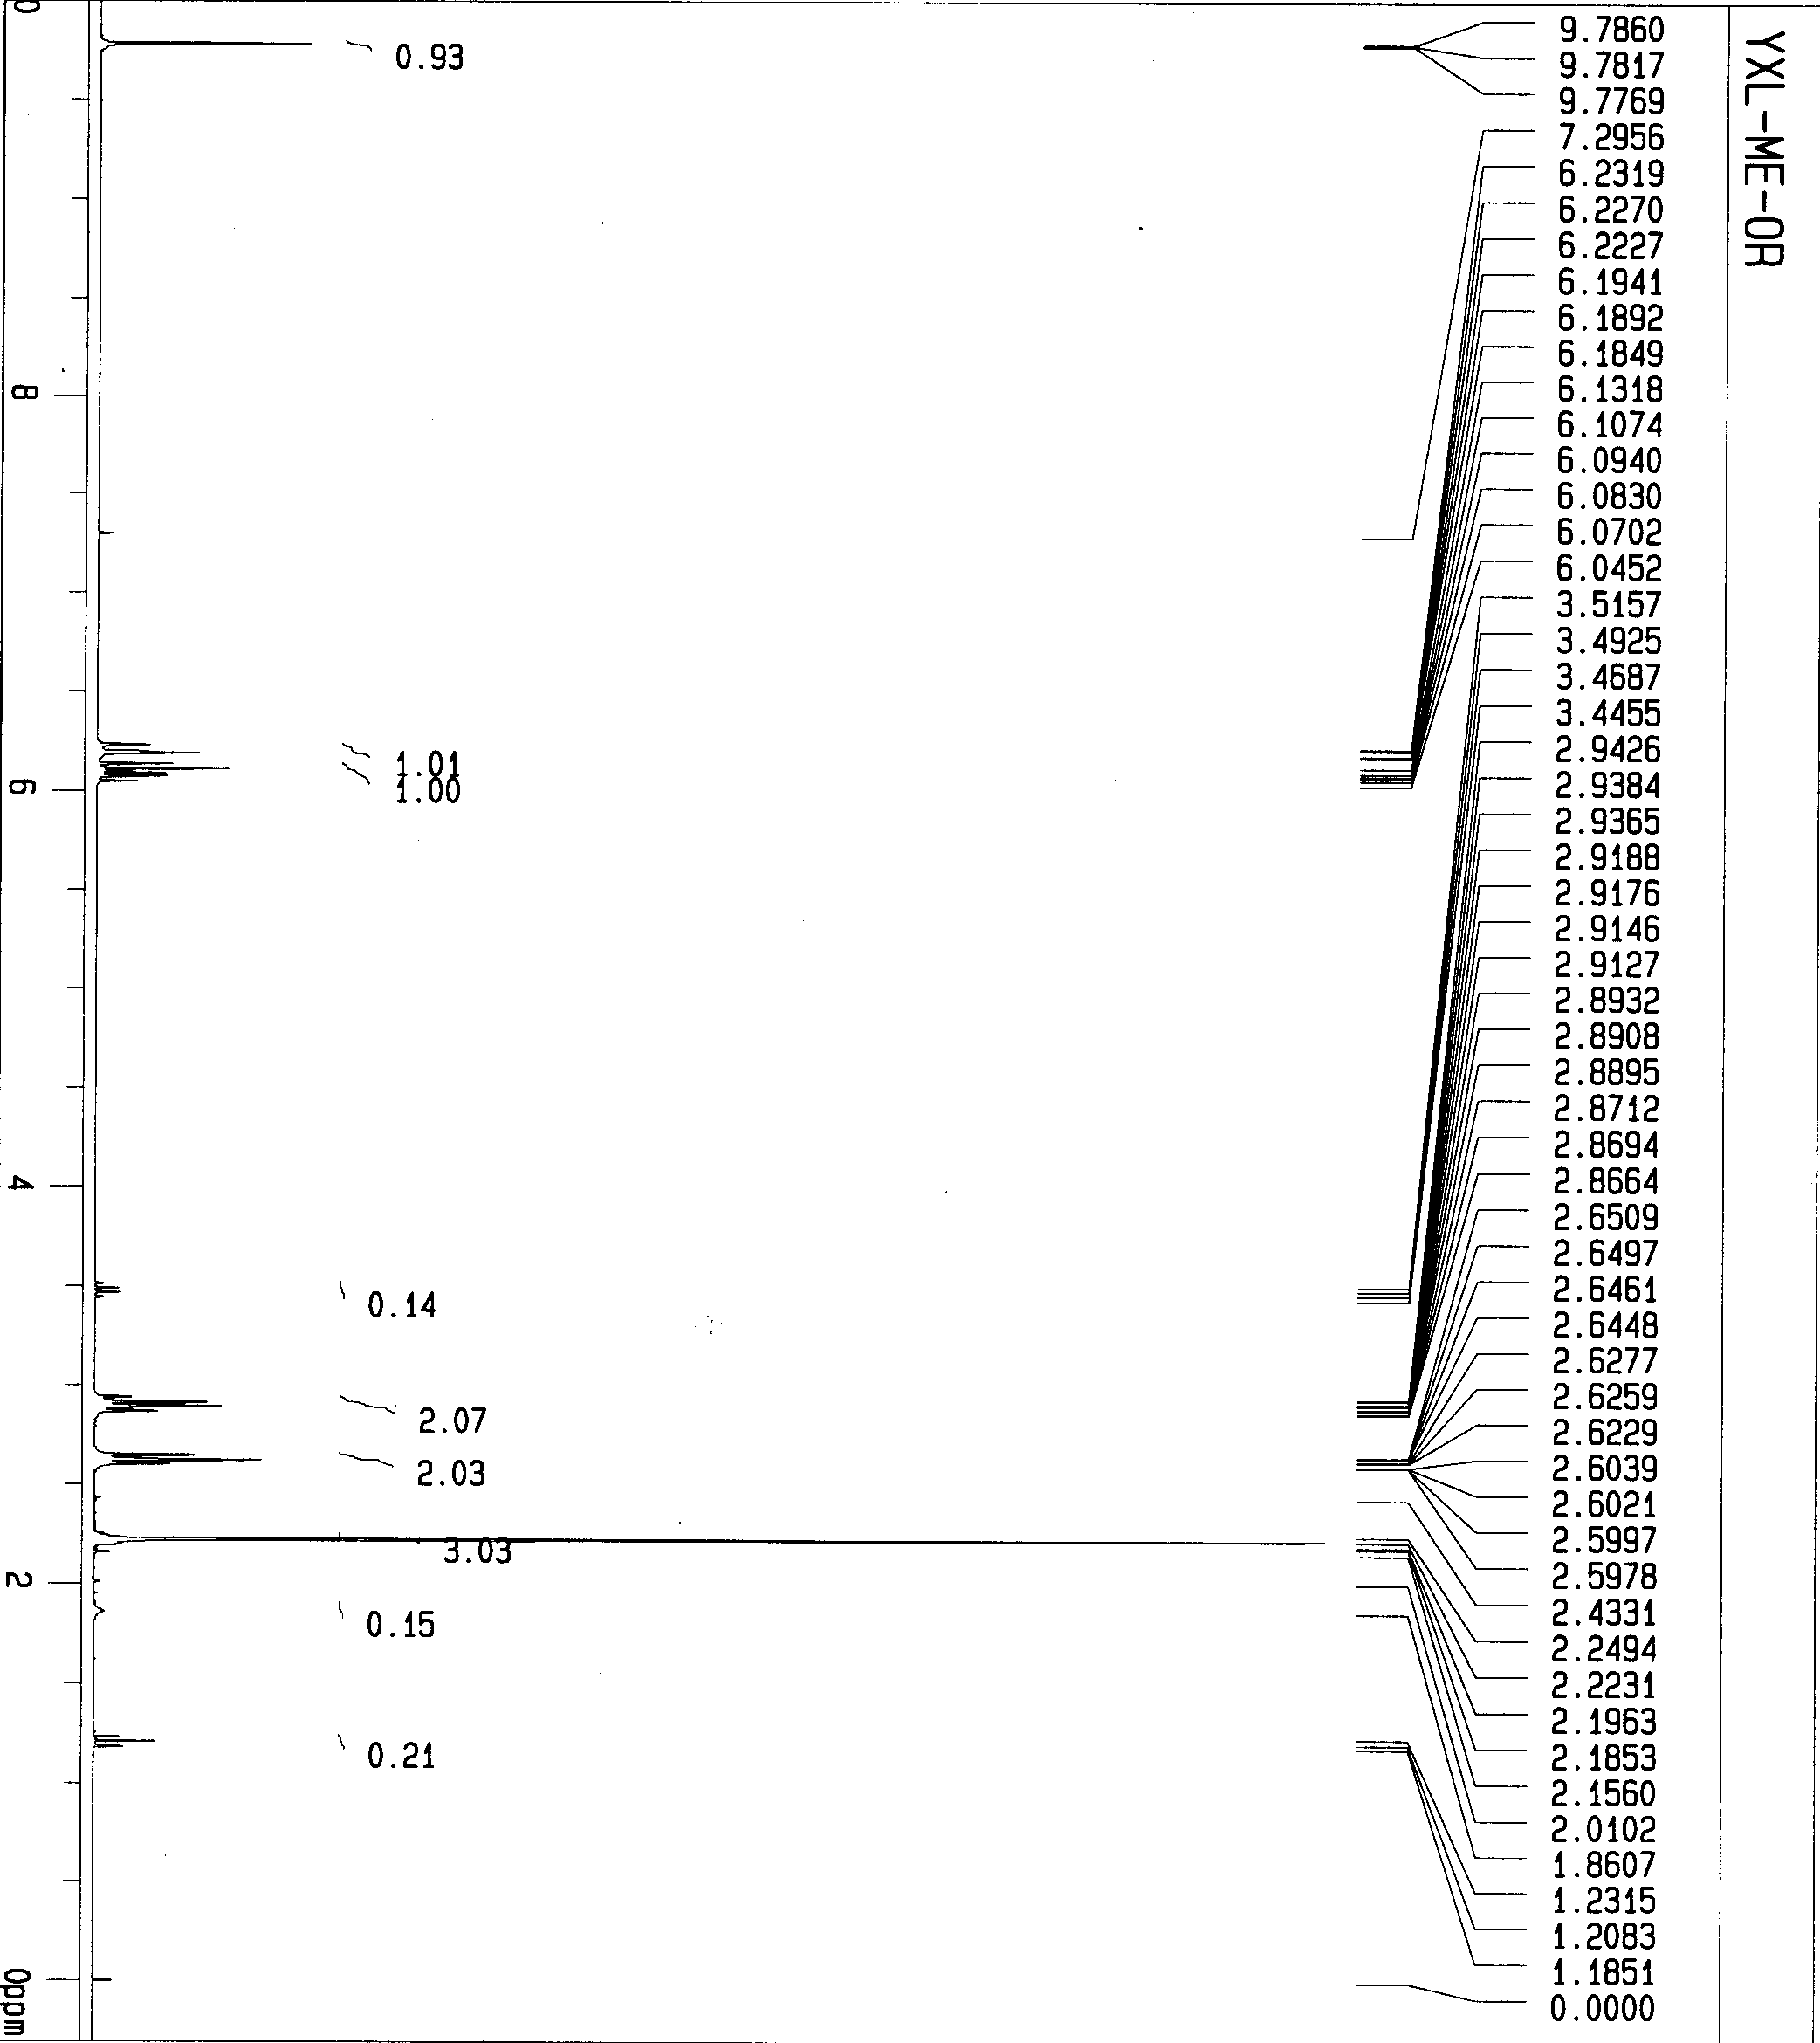


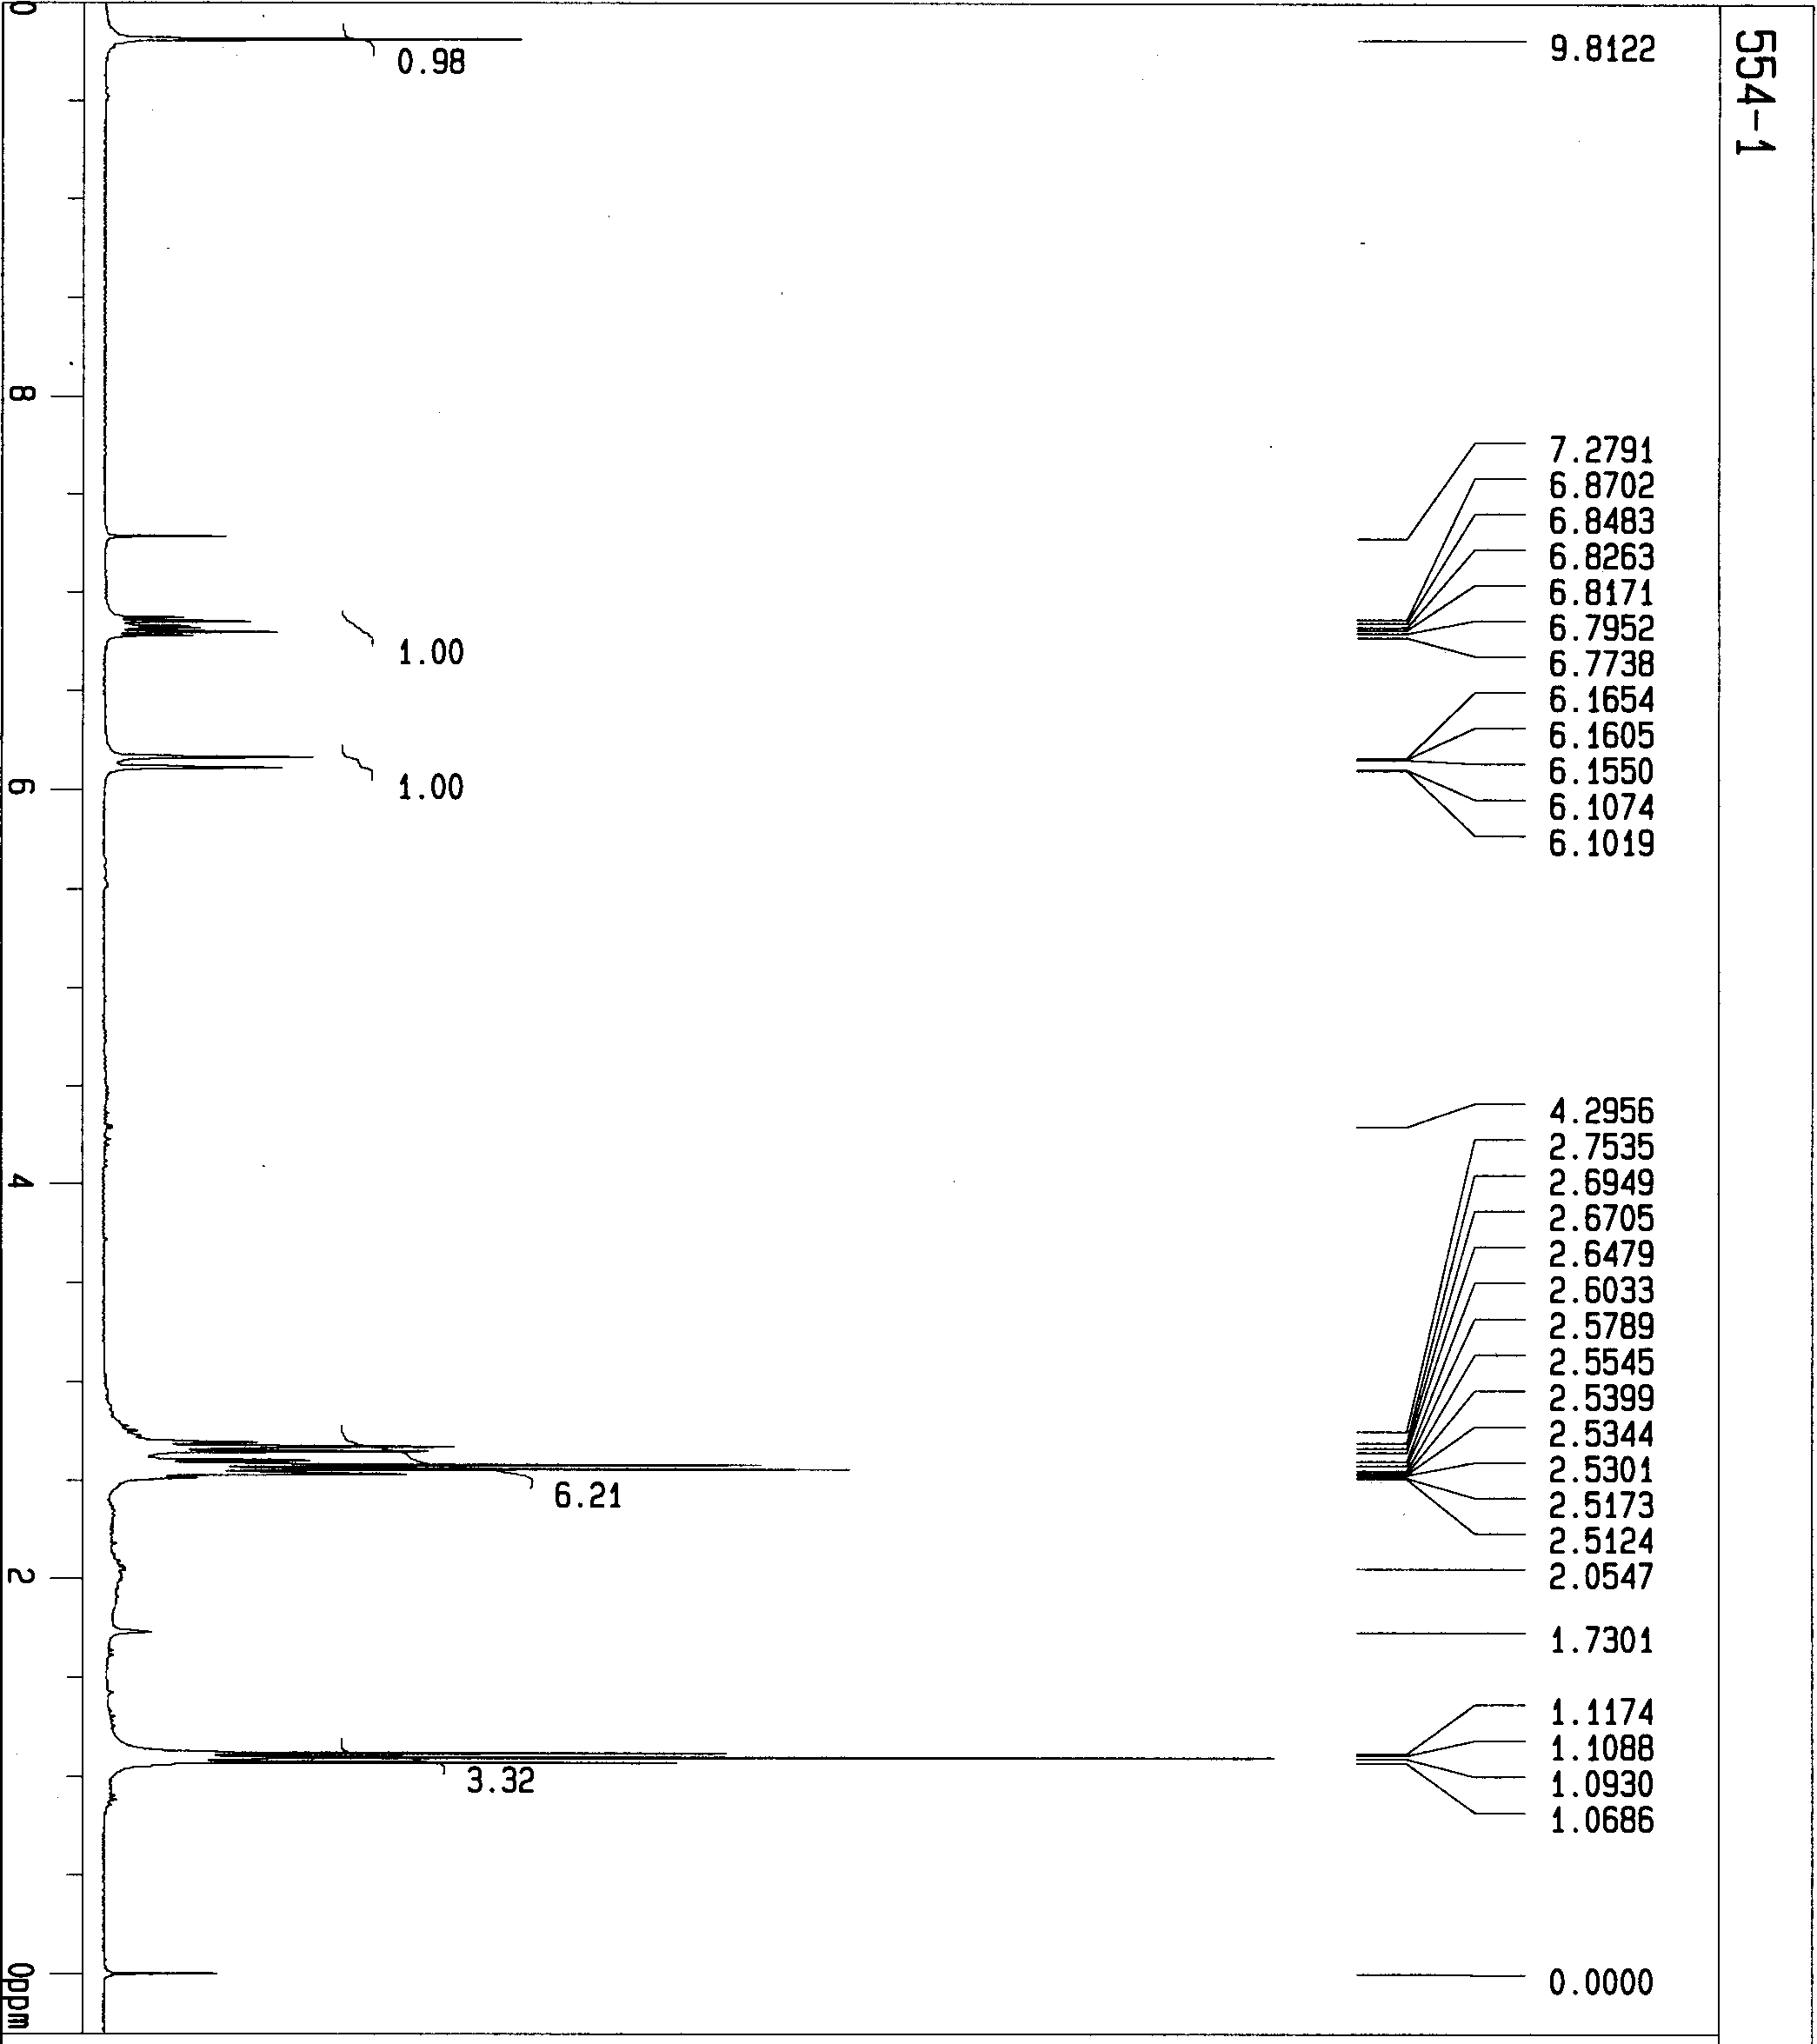


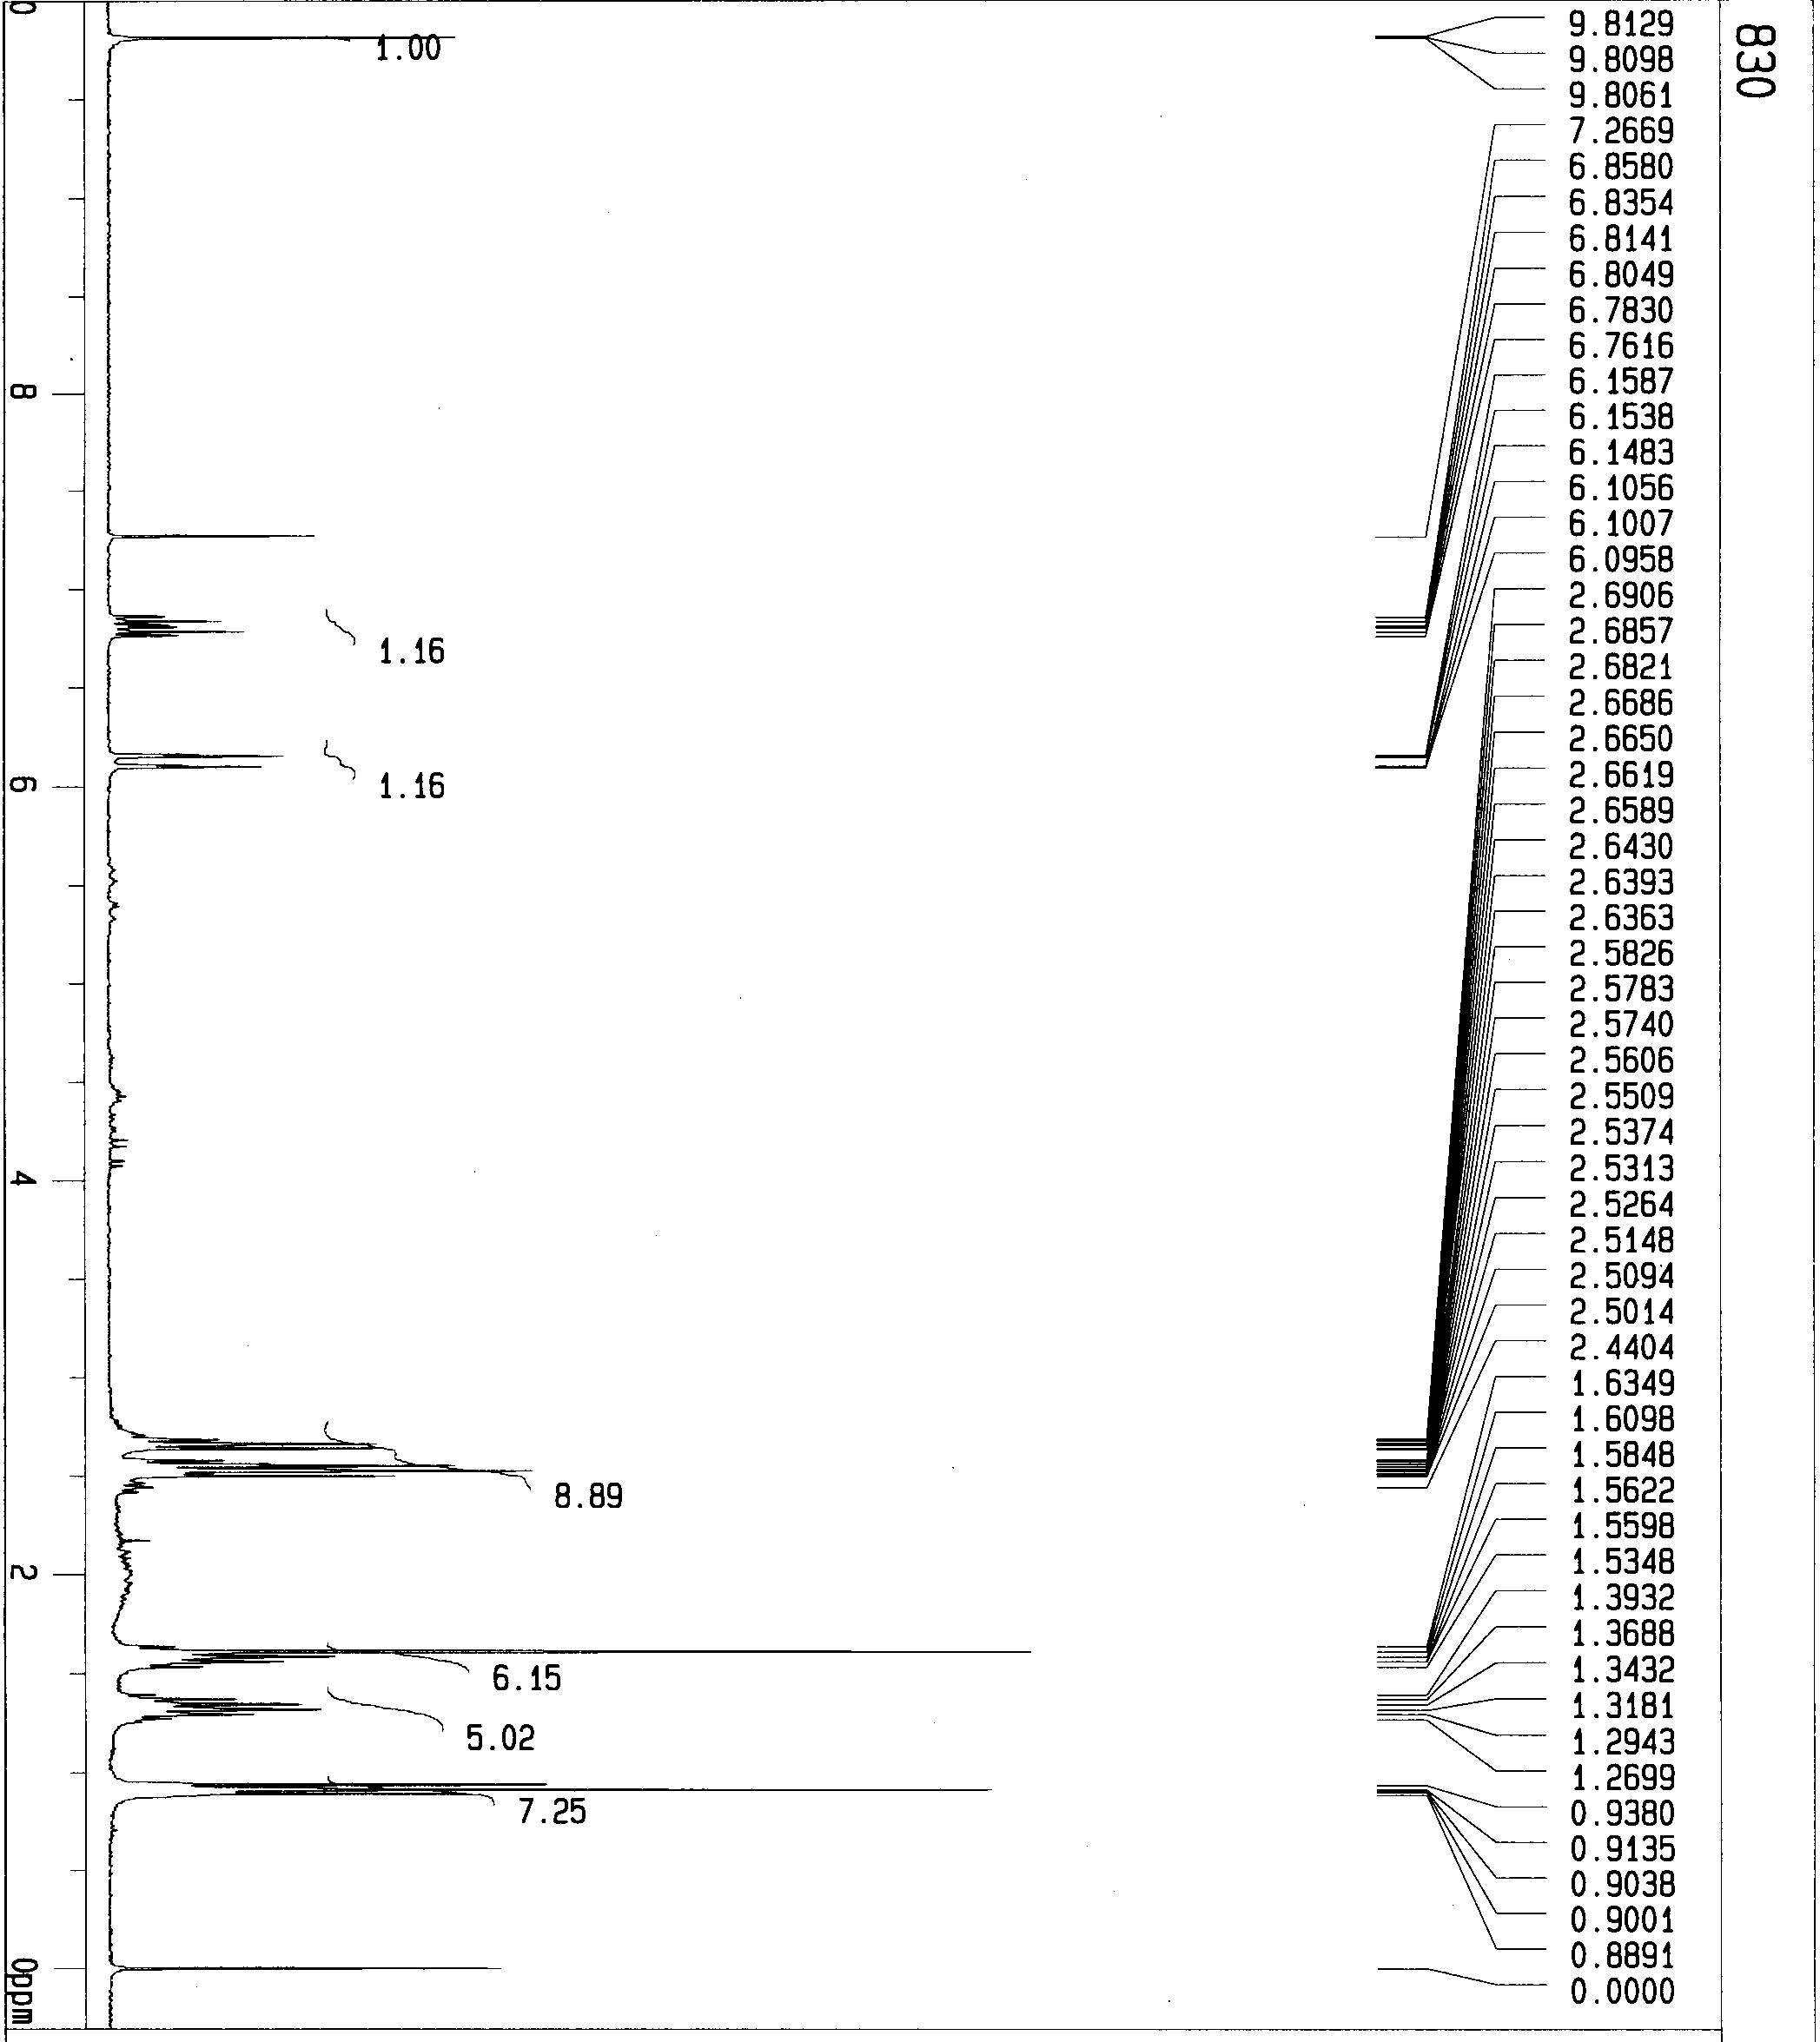


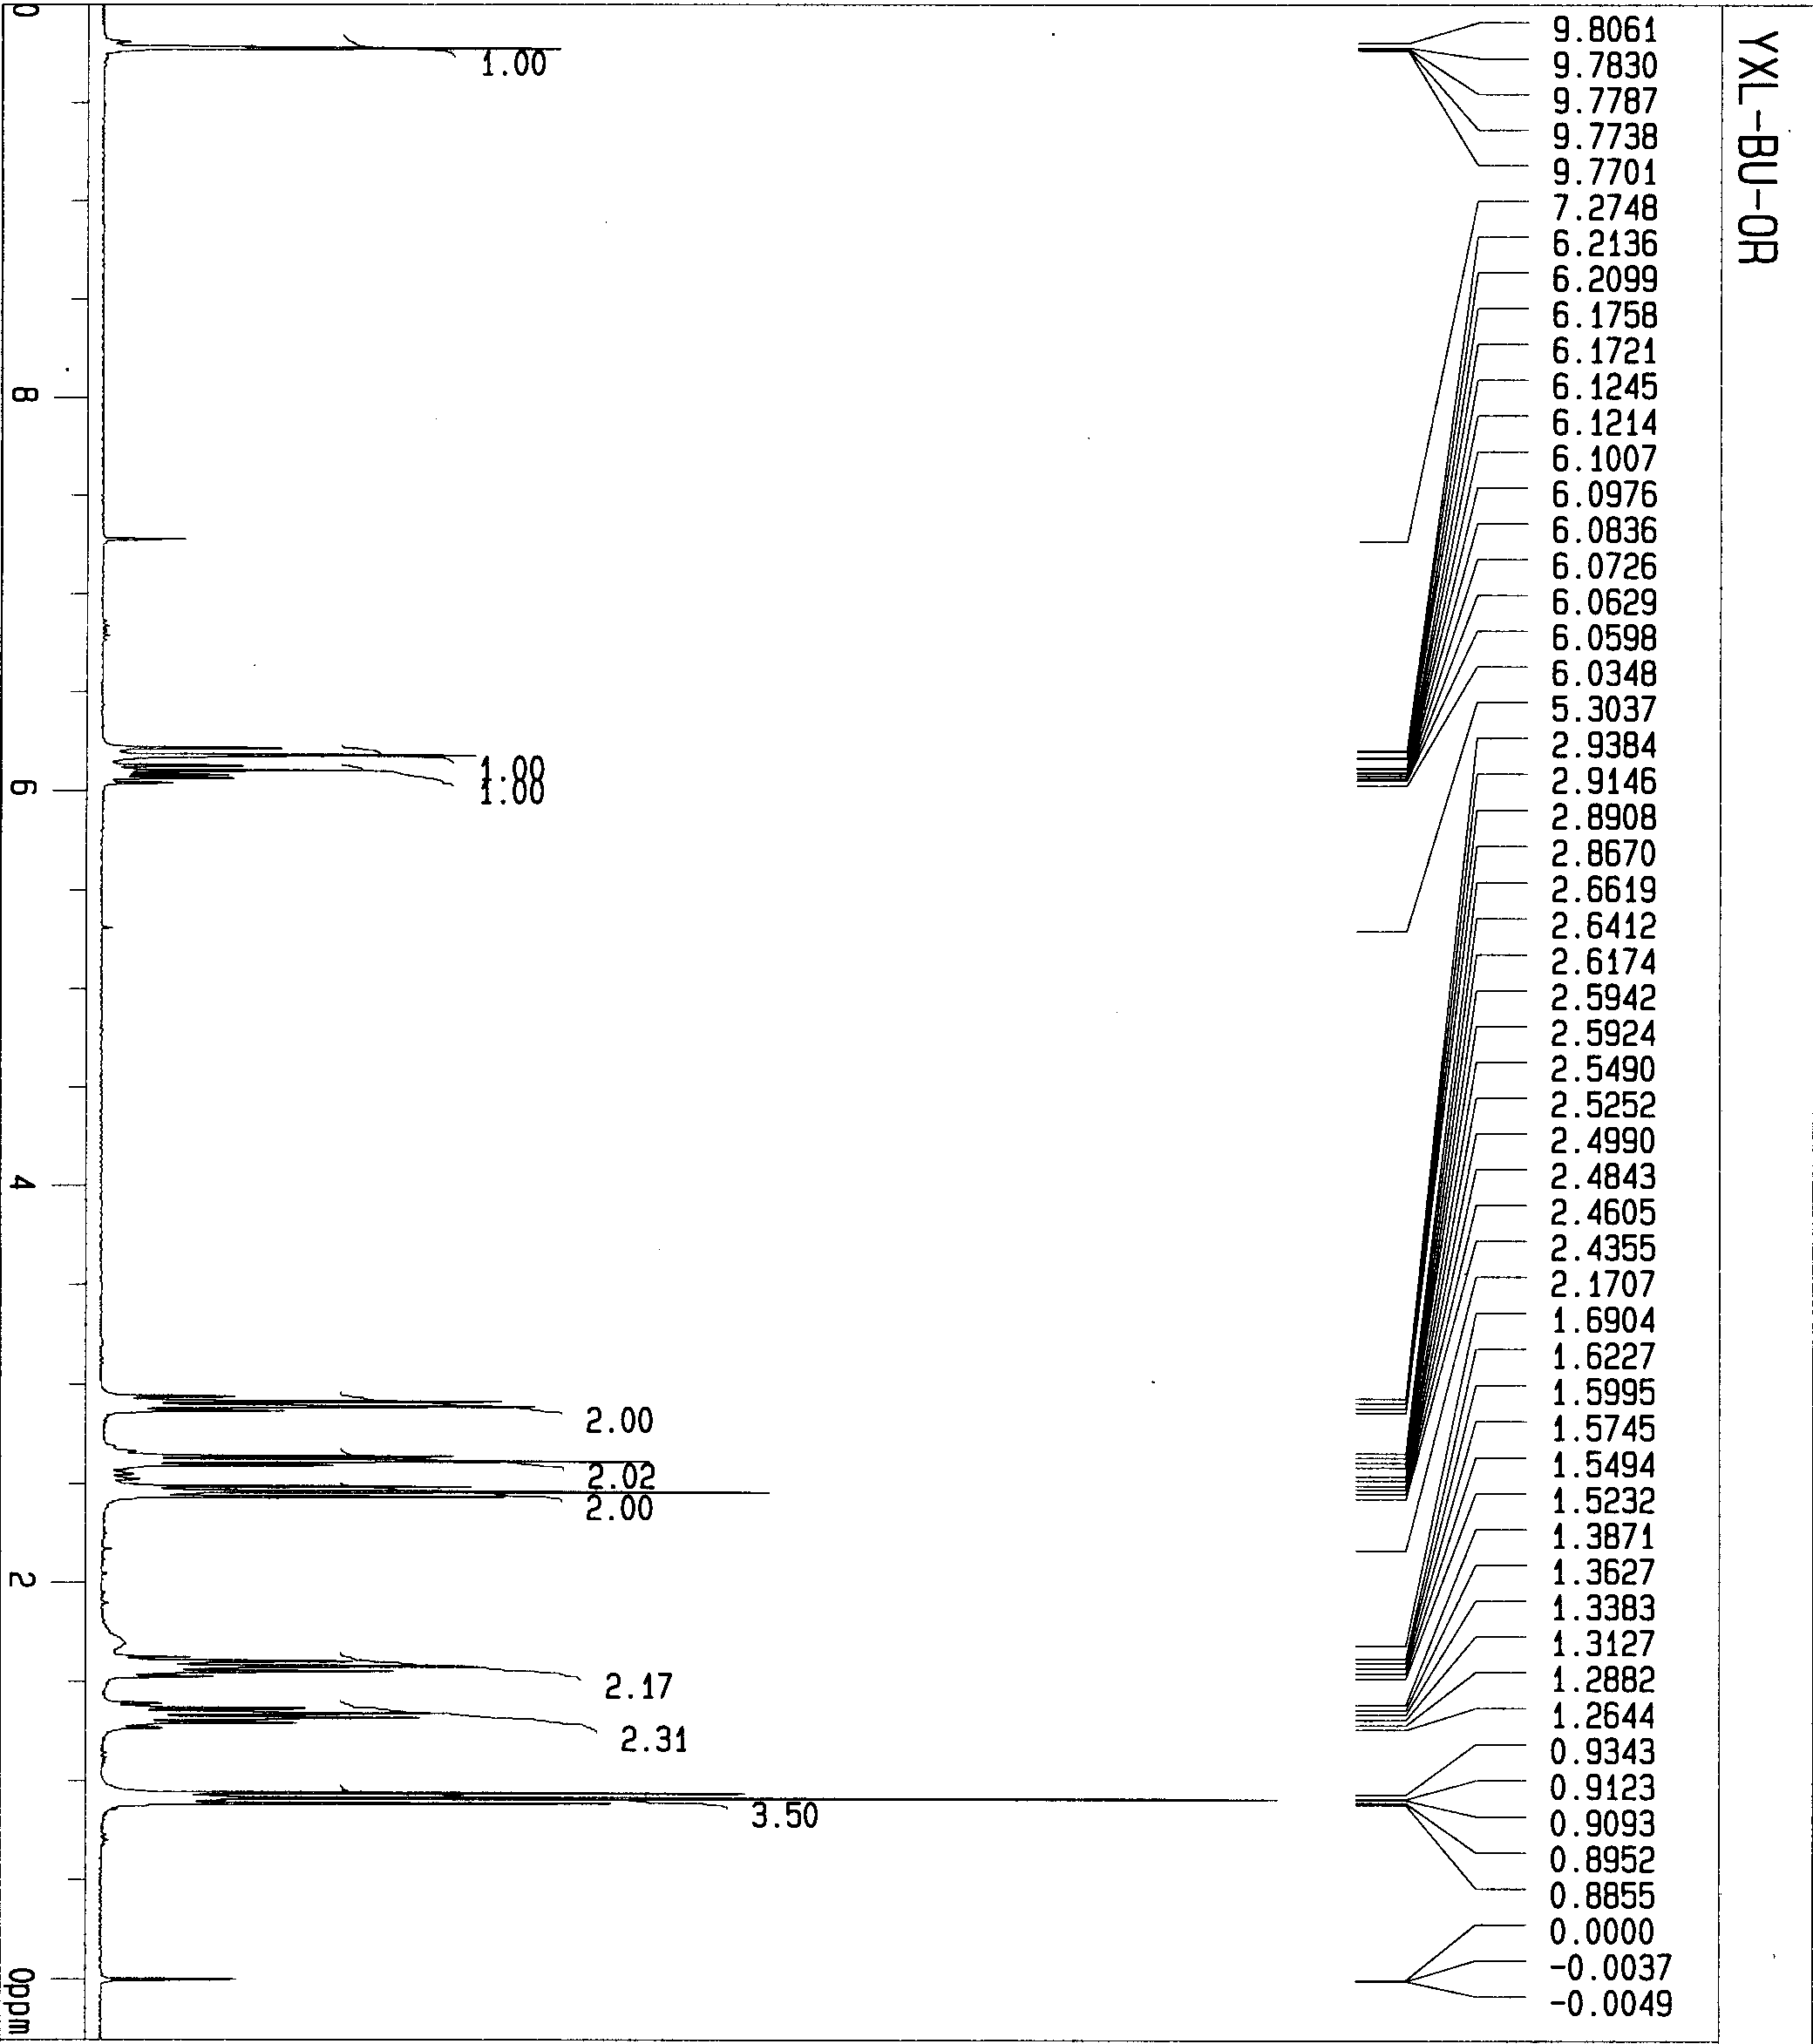


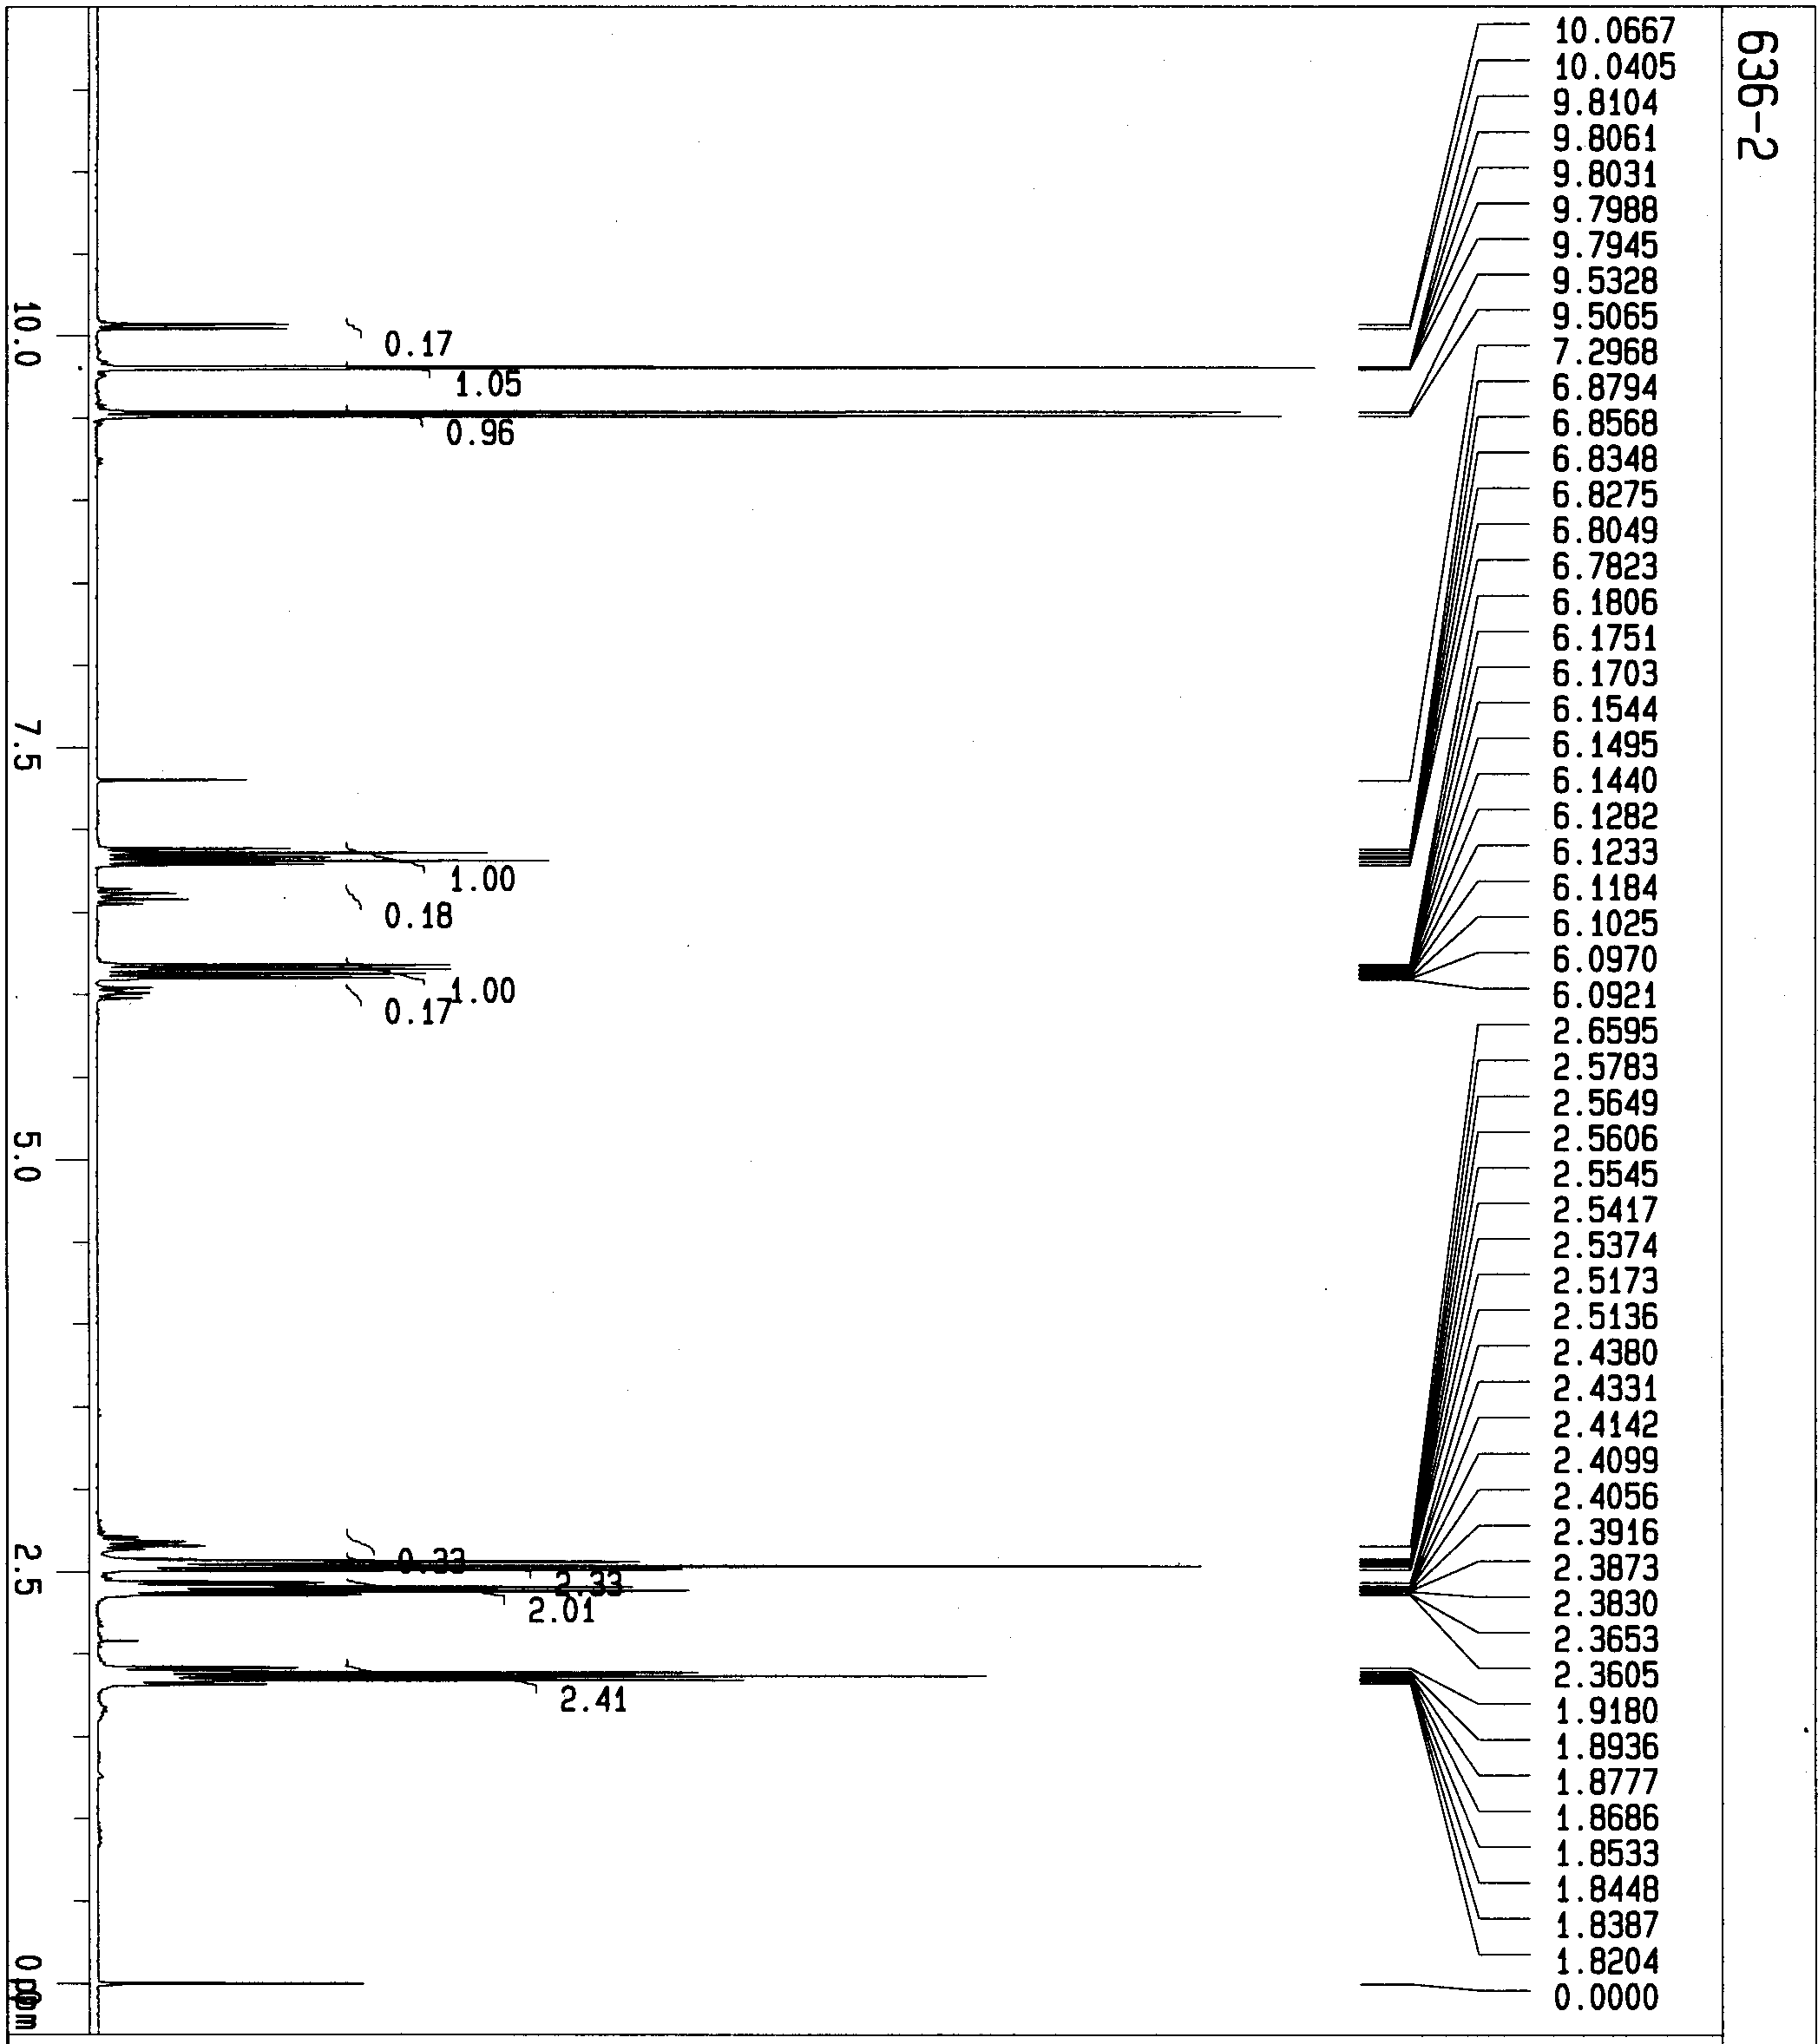
a 5.5:1 mixture of stereoisomers


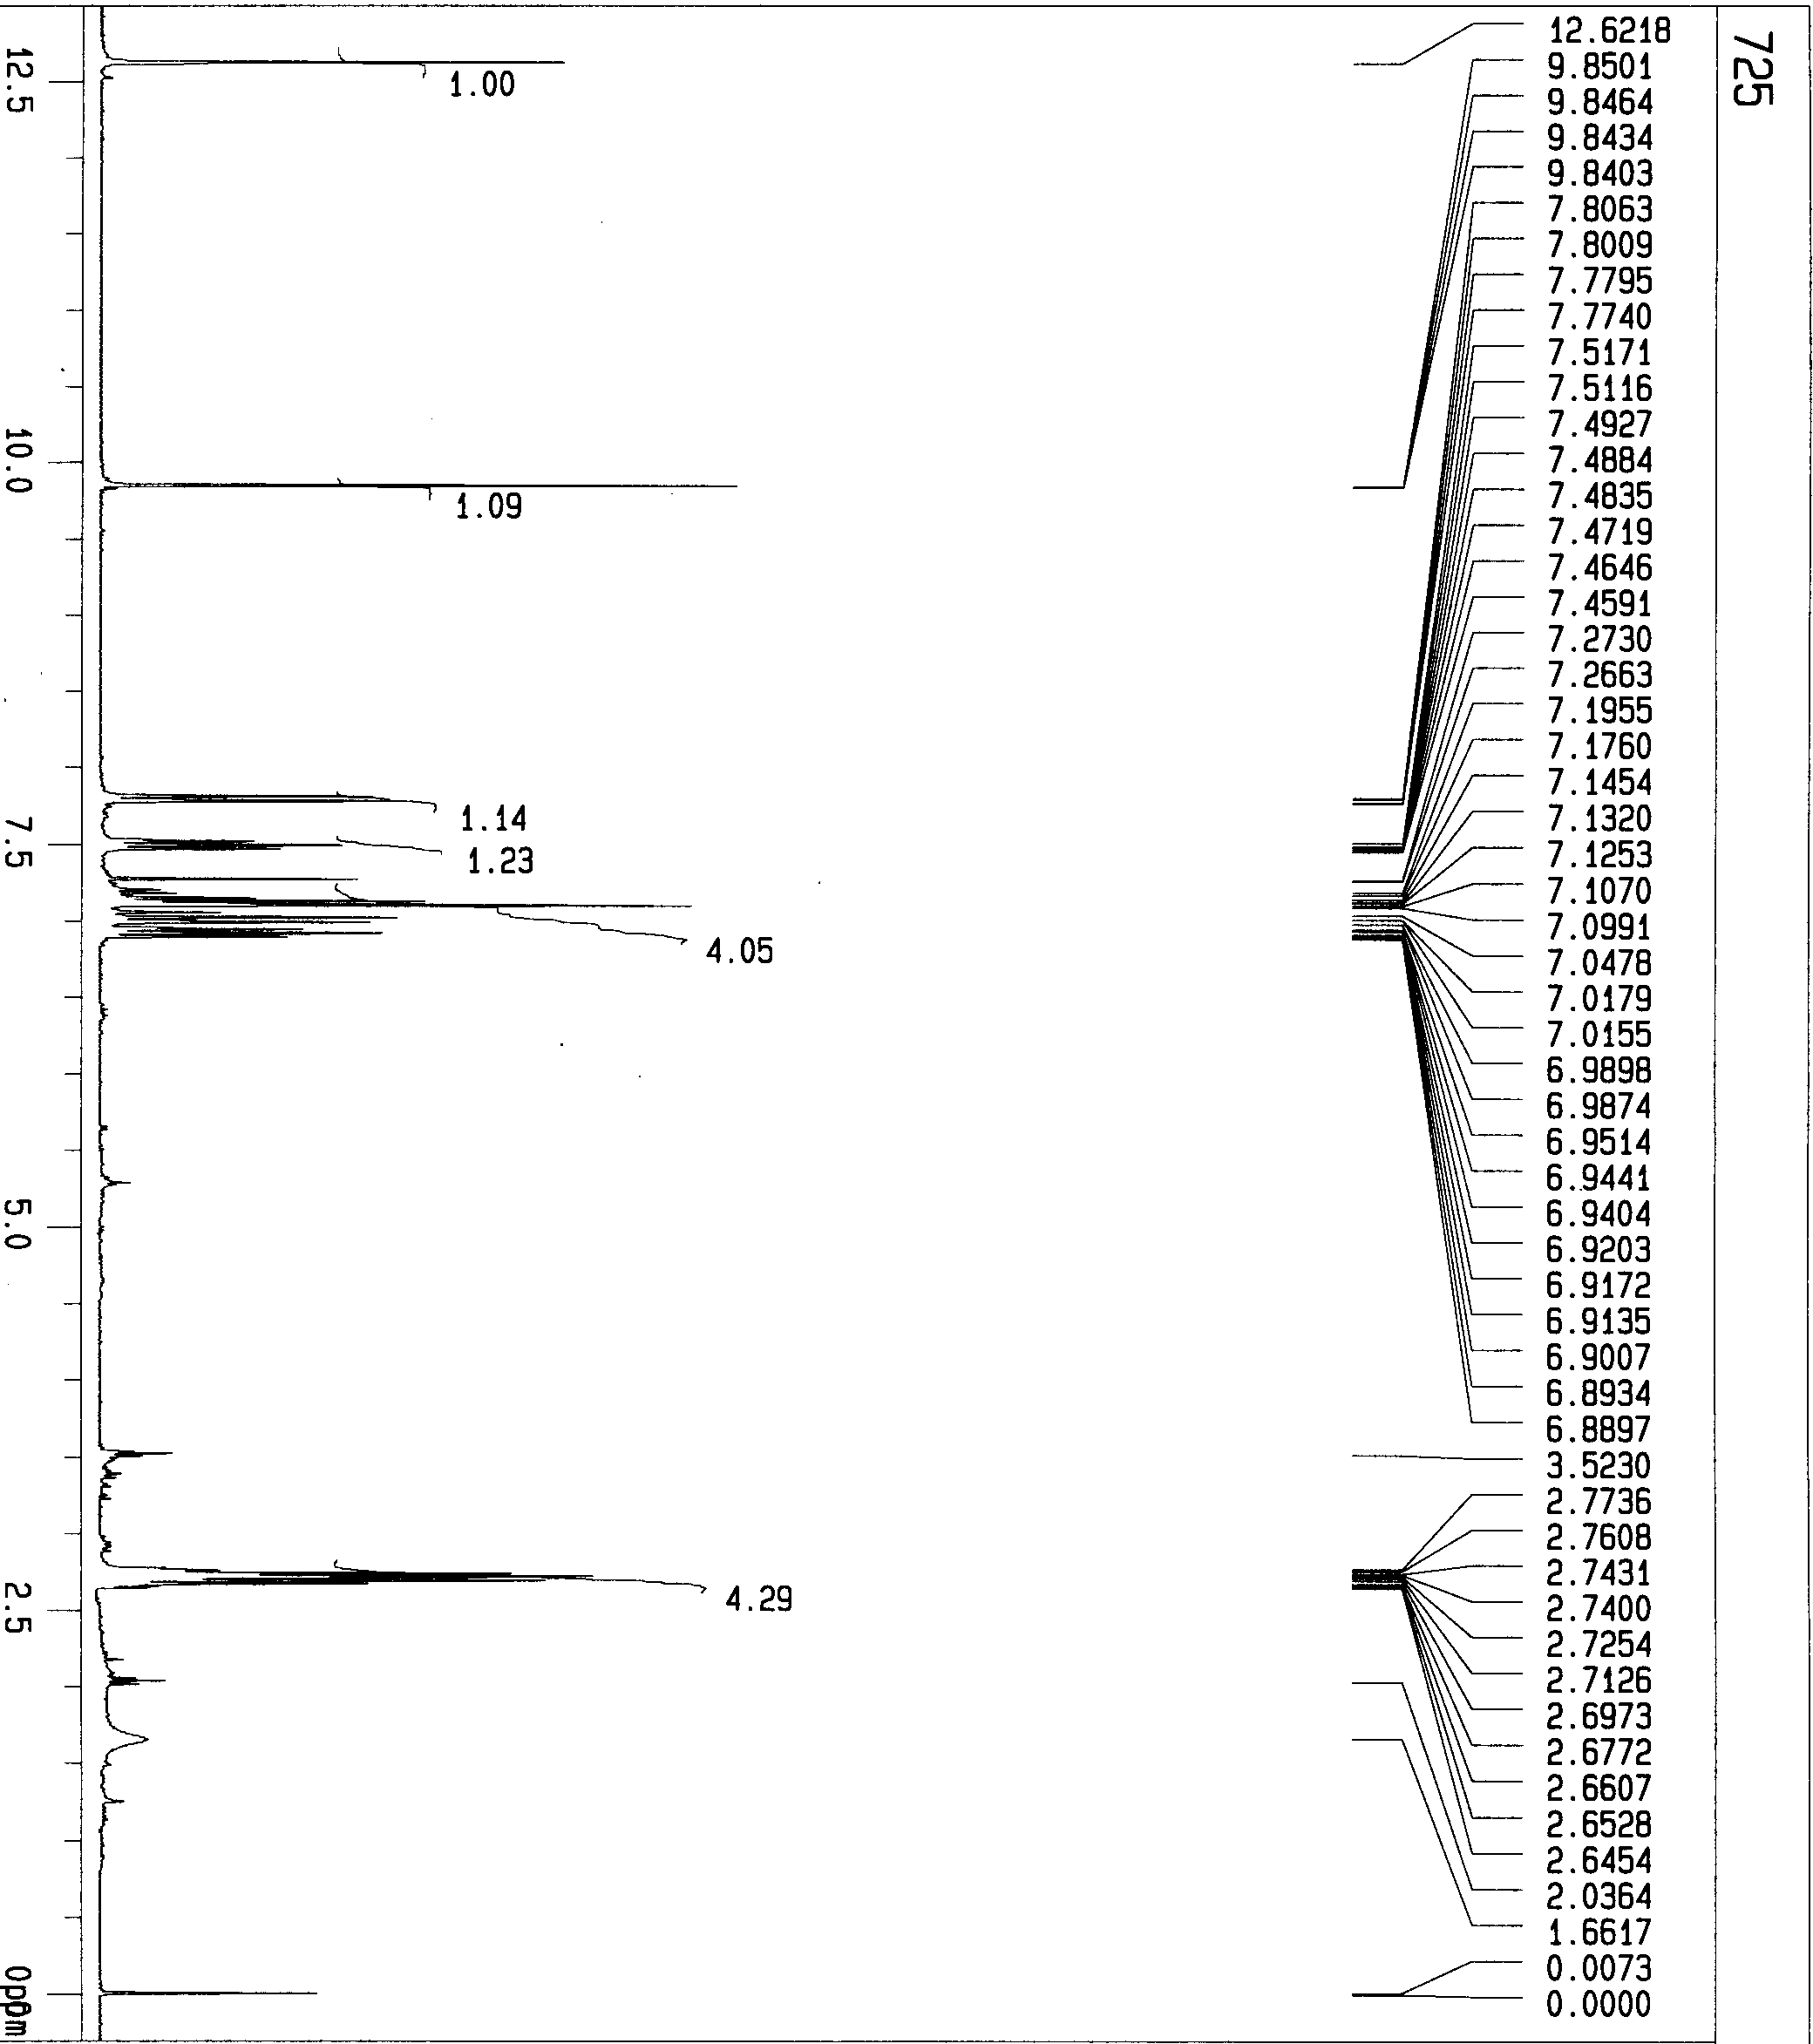


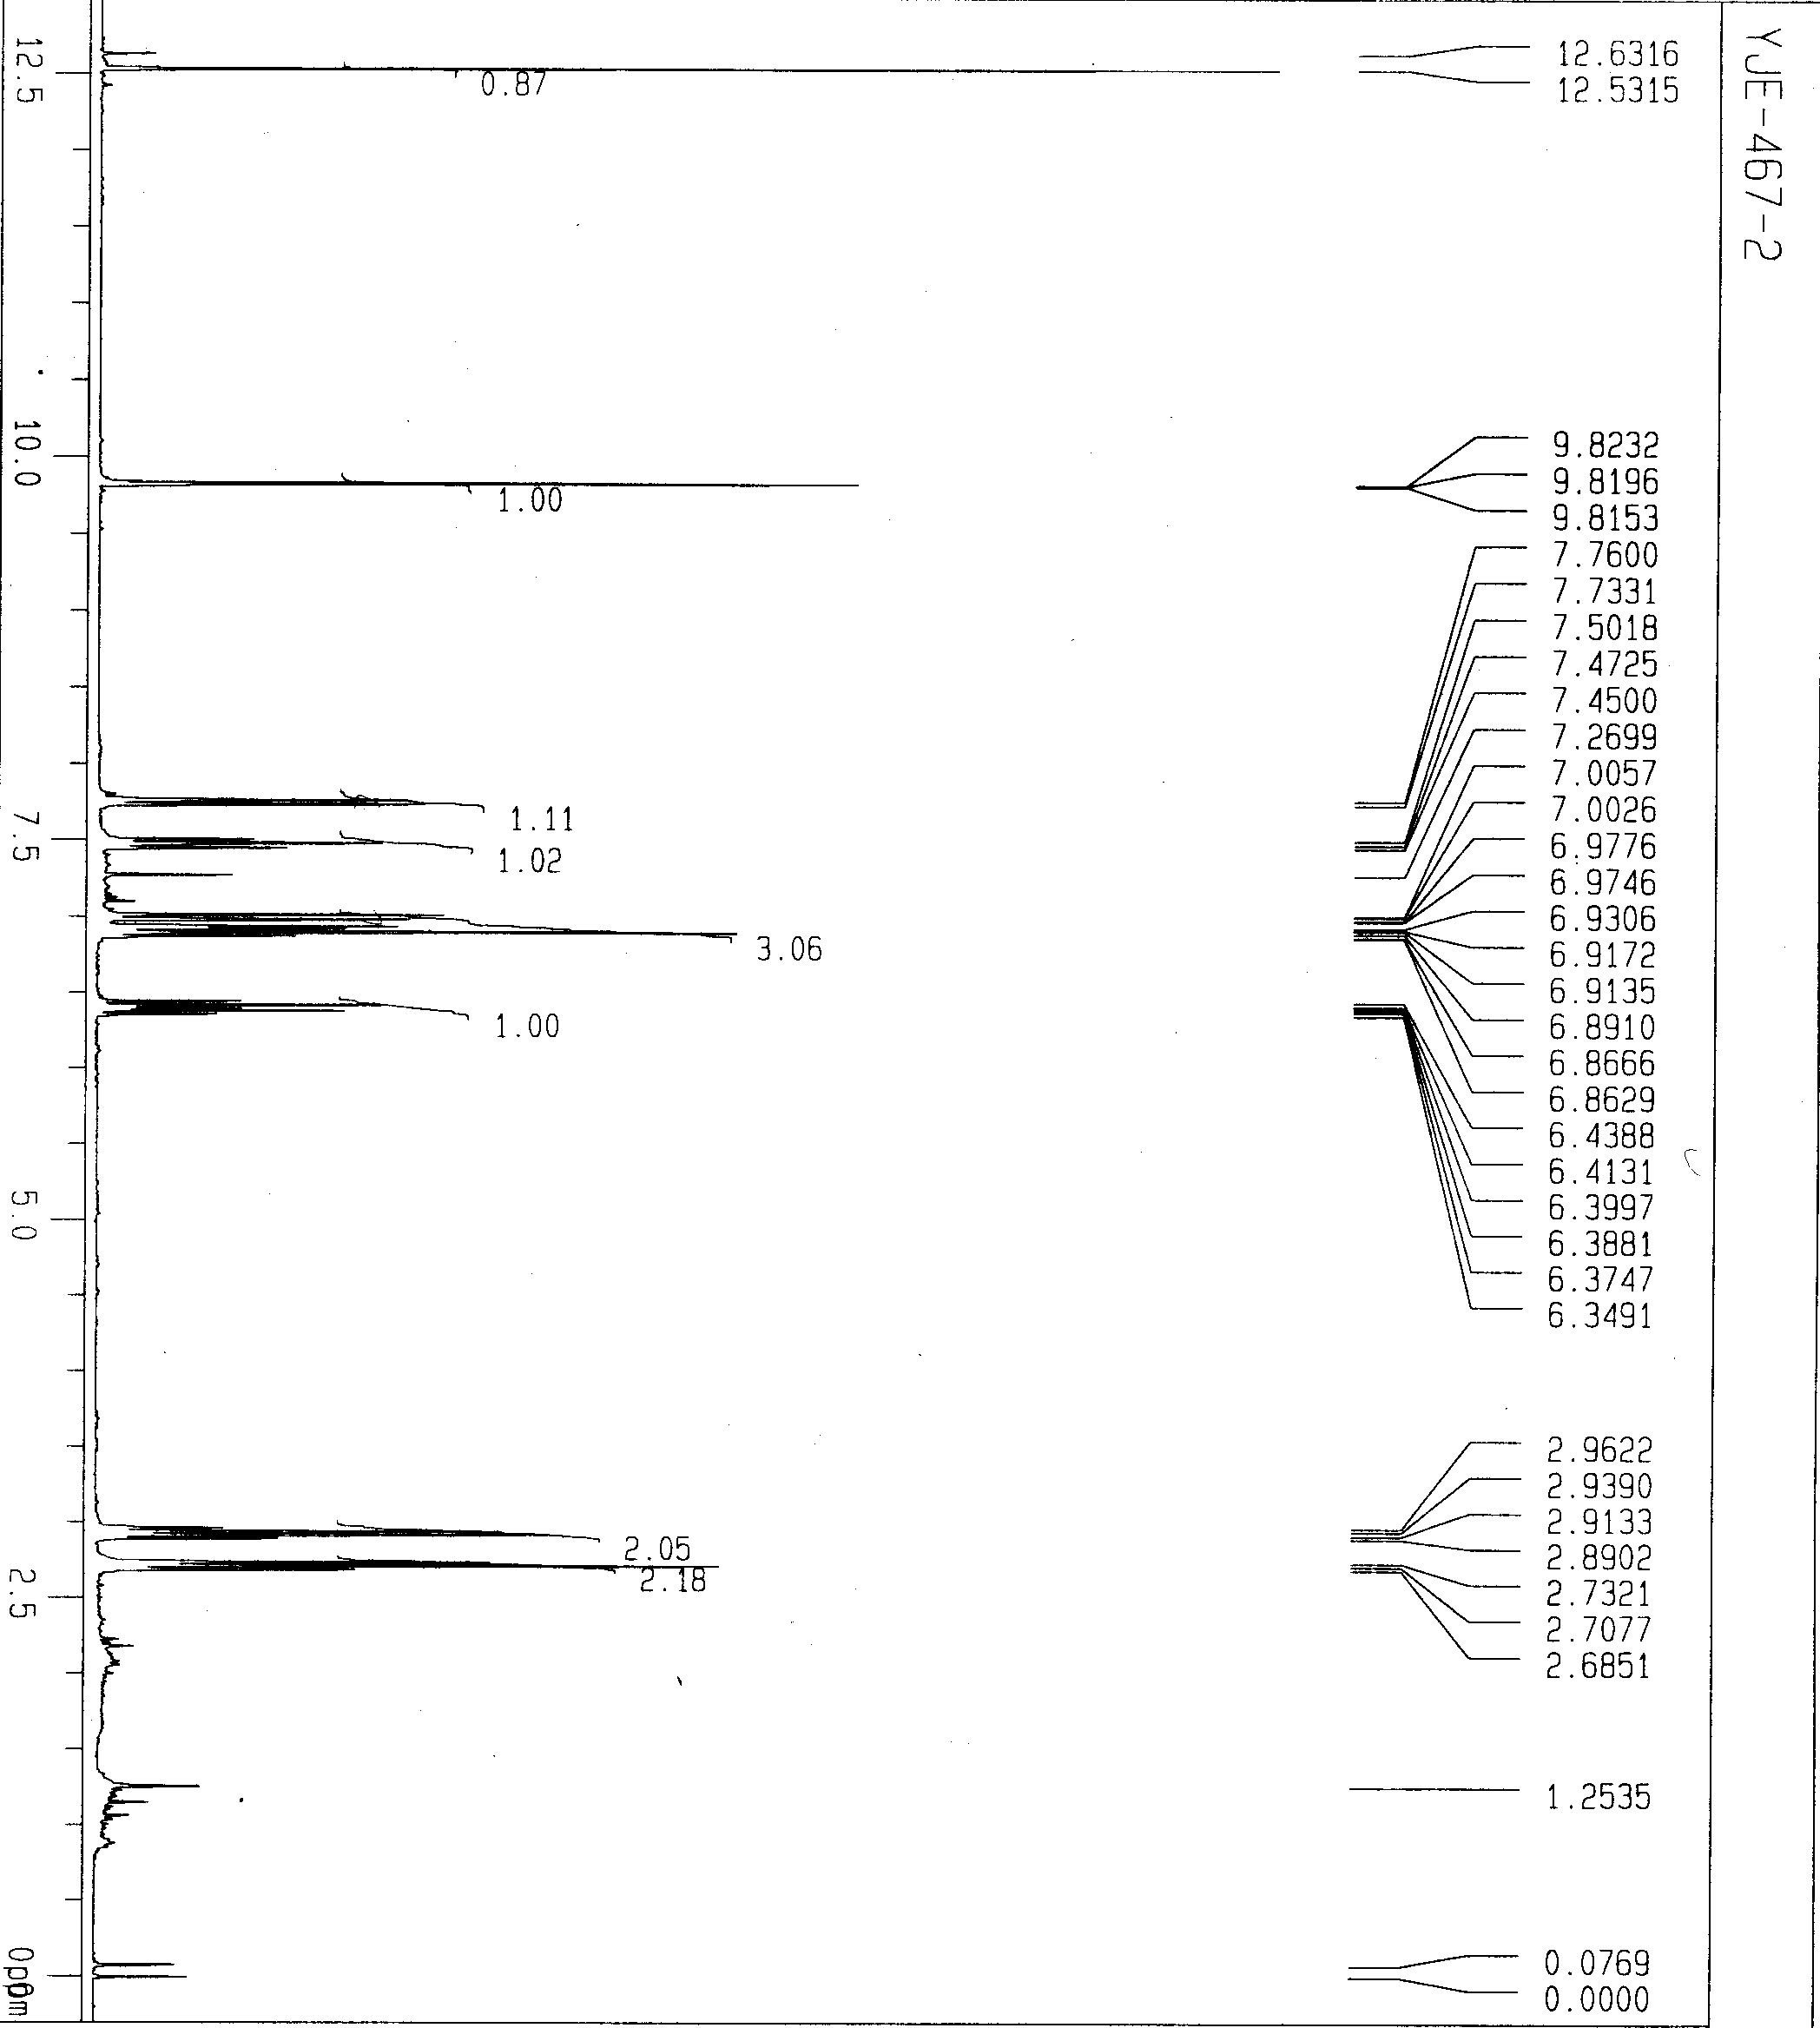


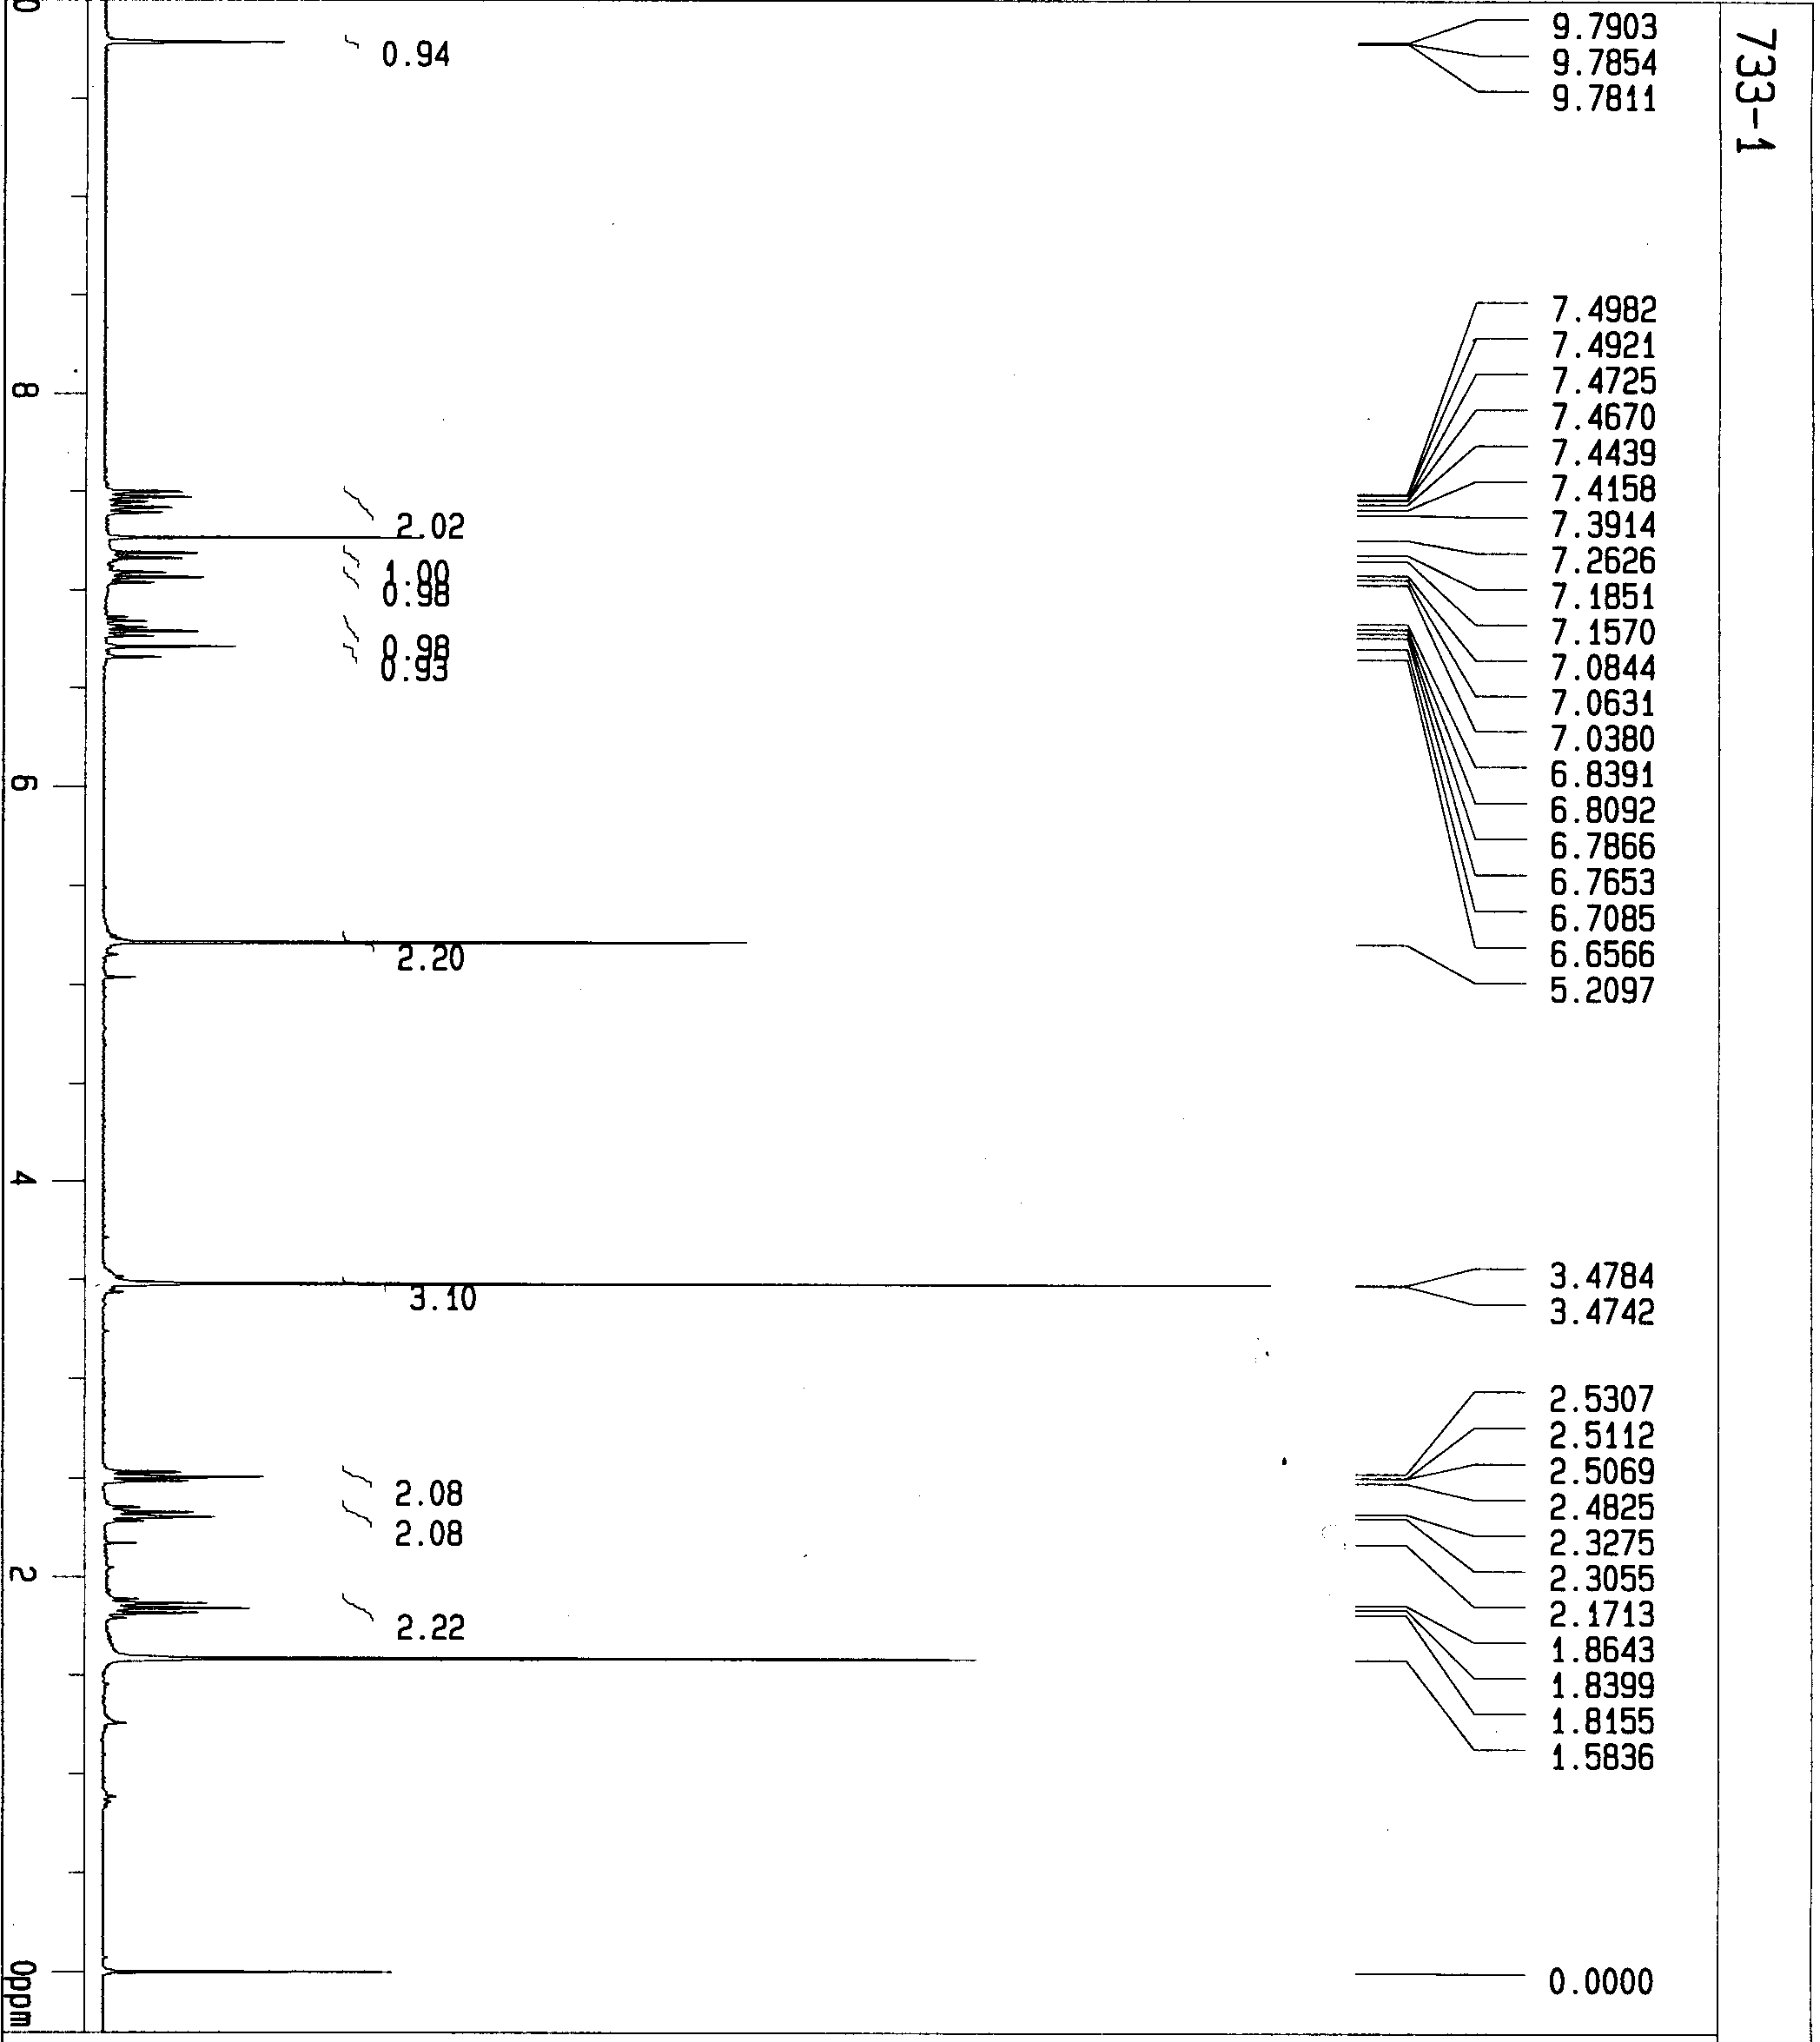


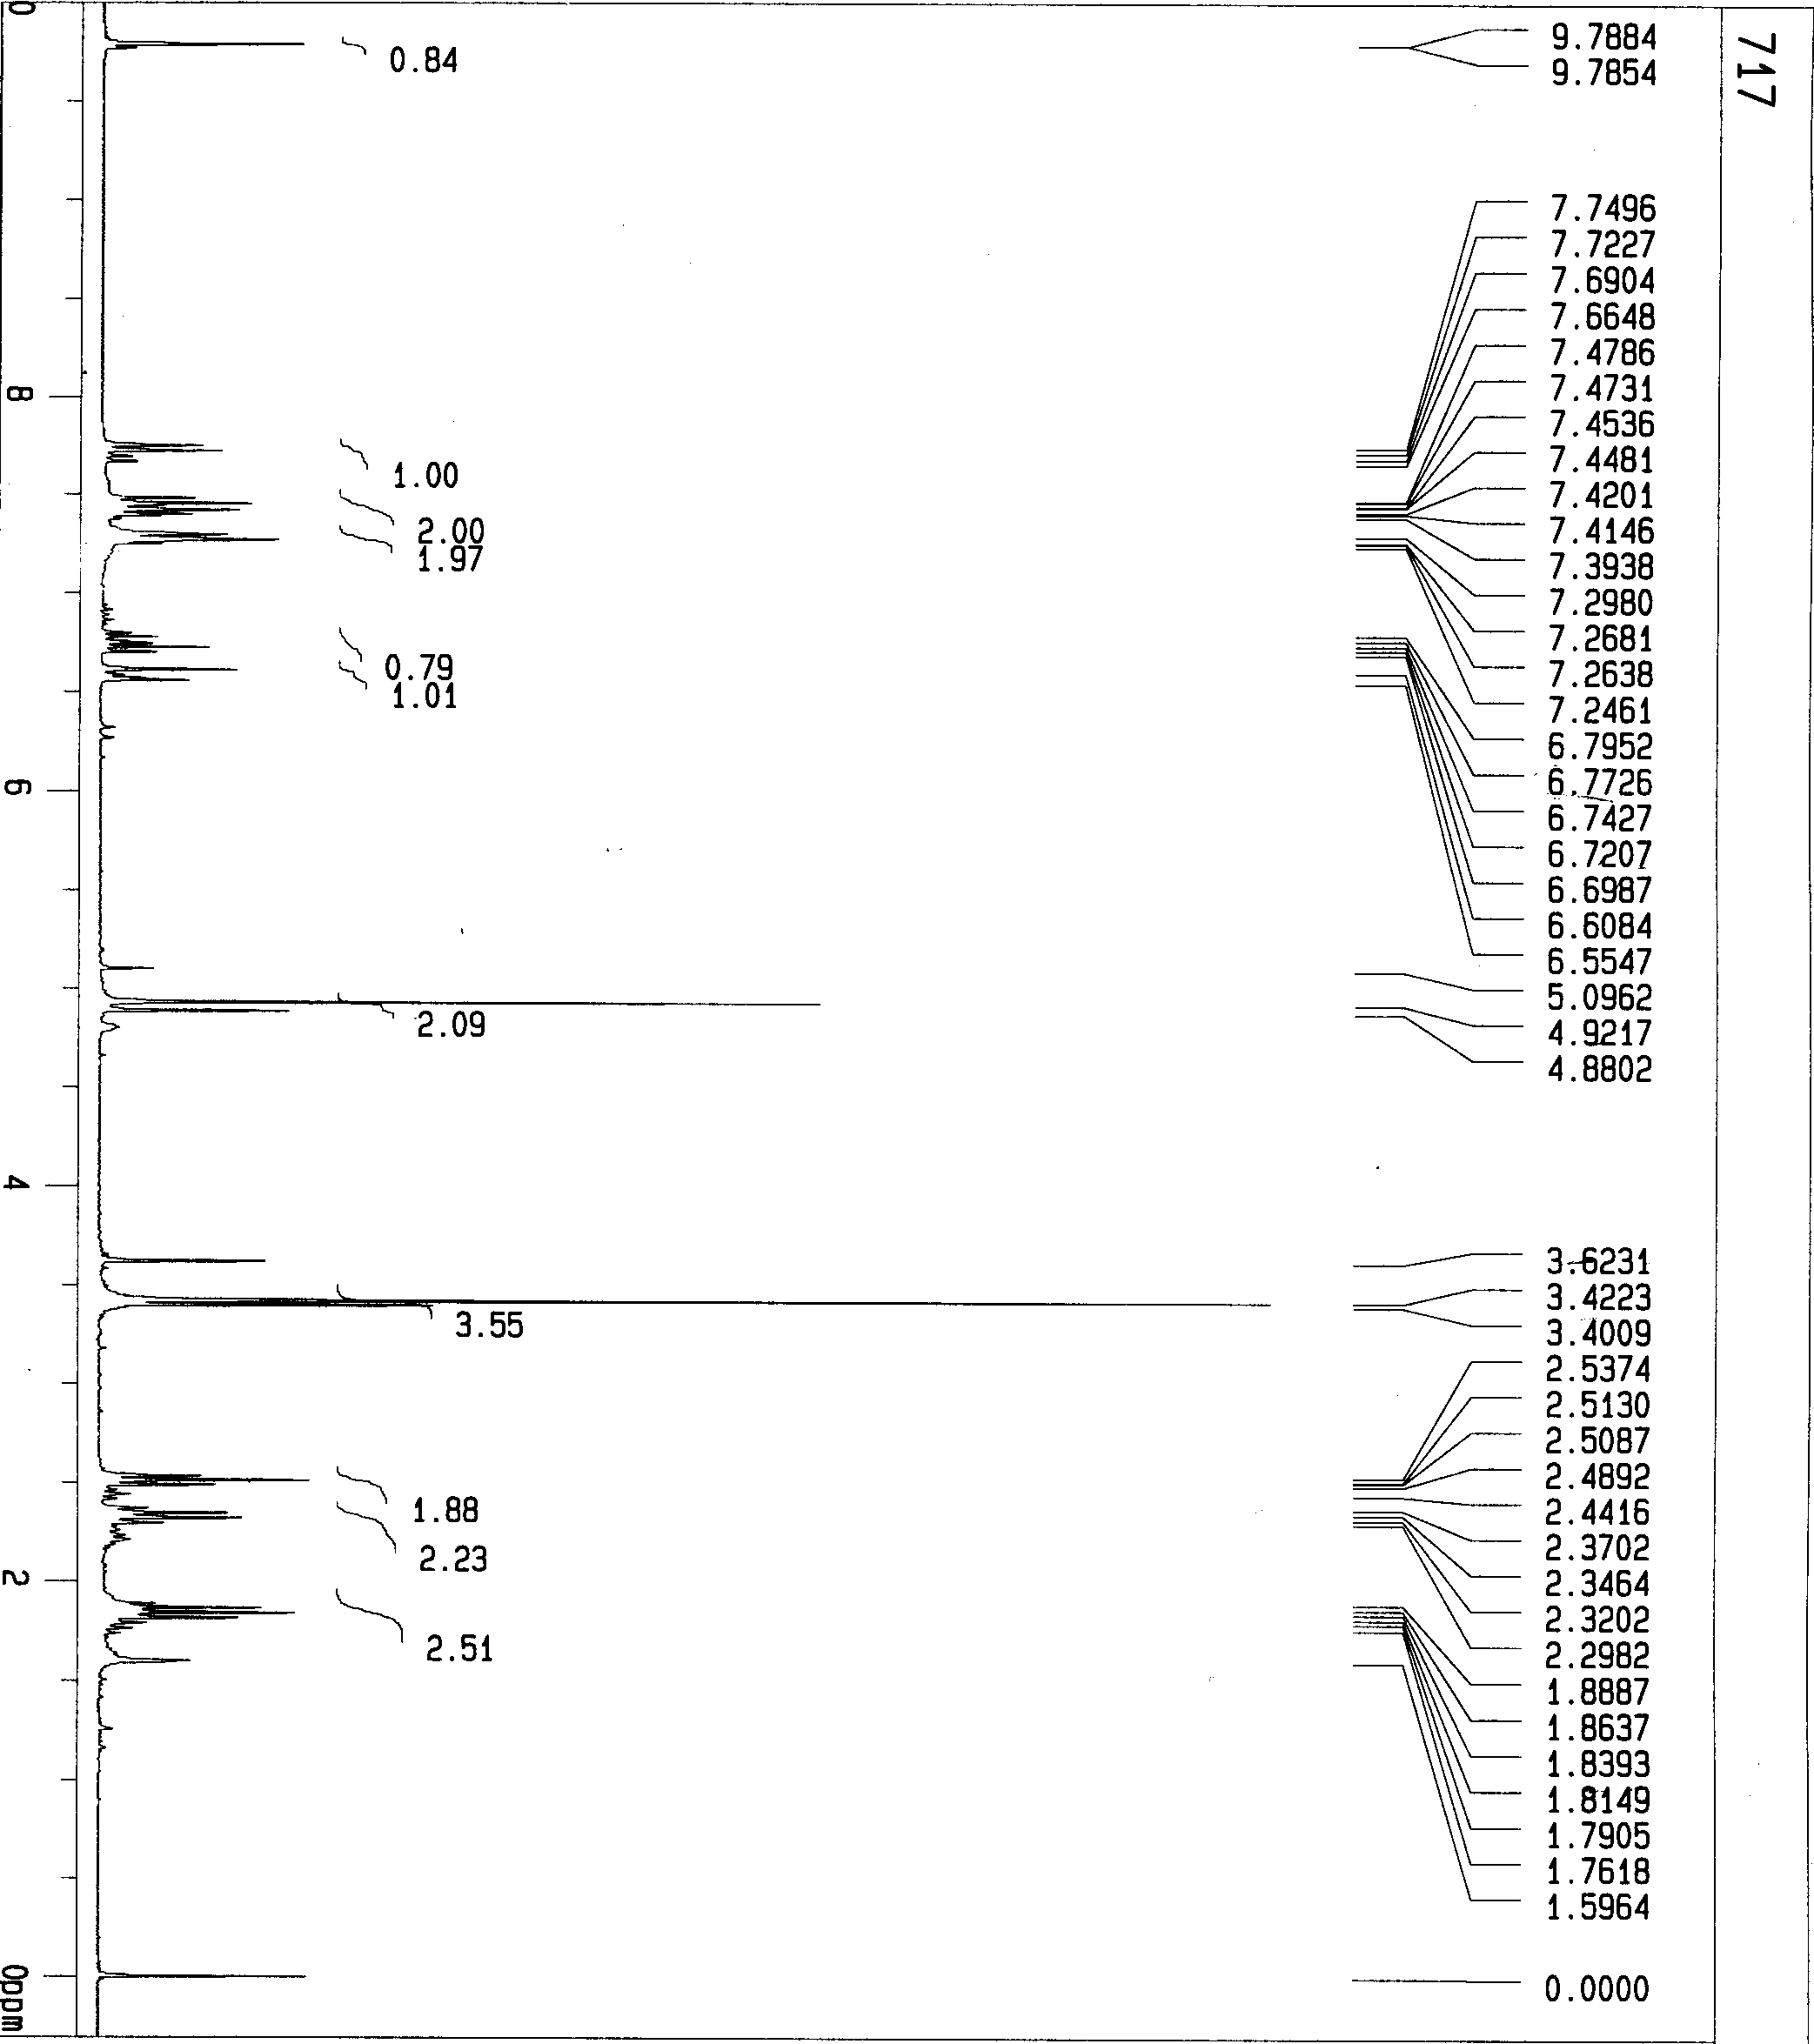


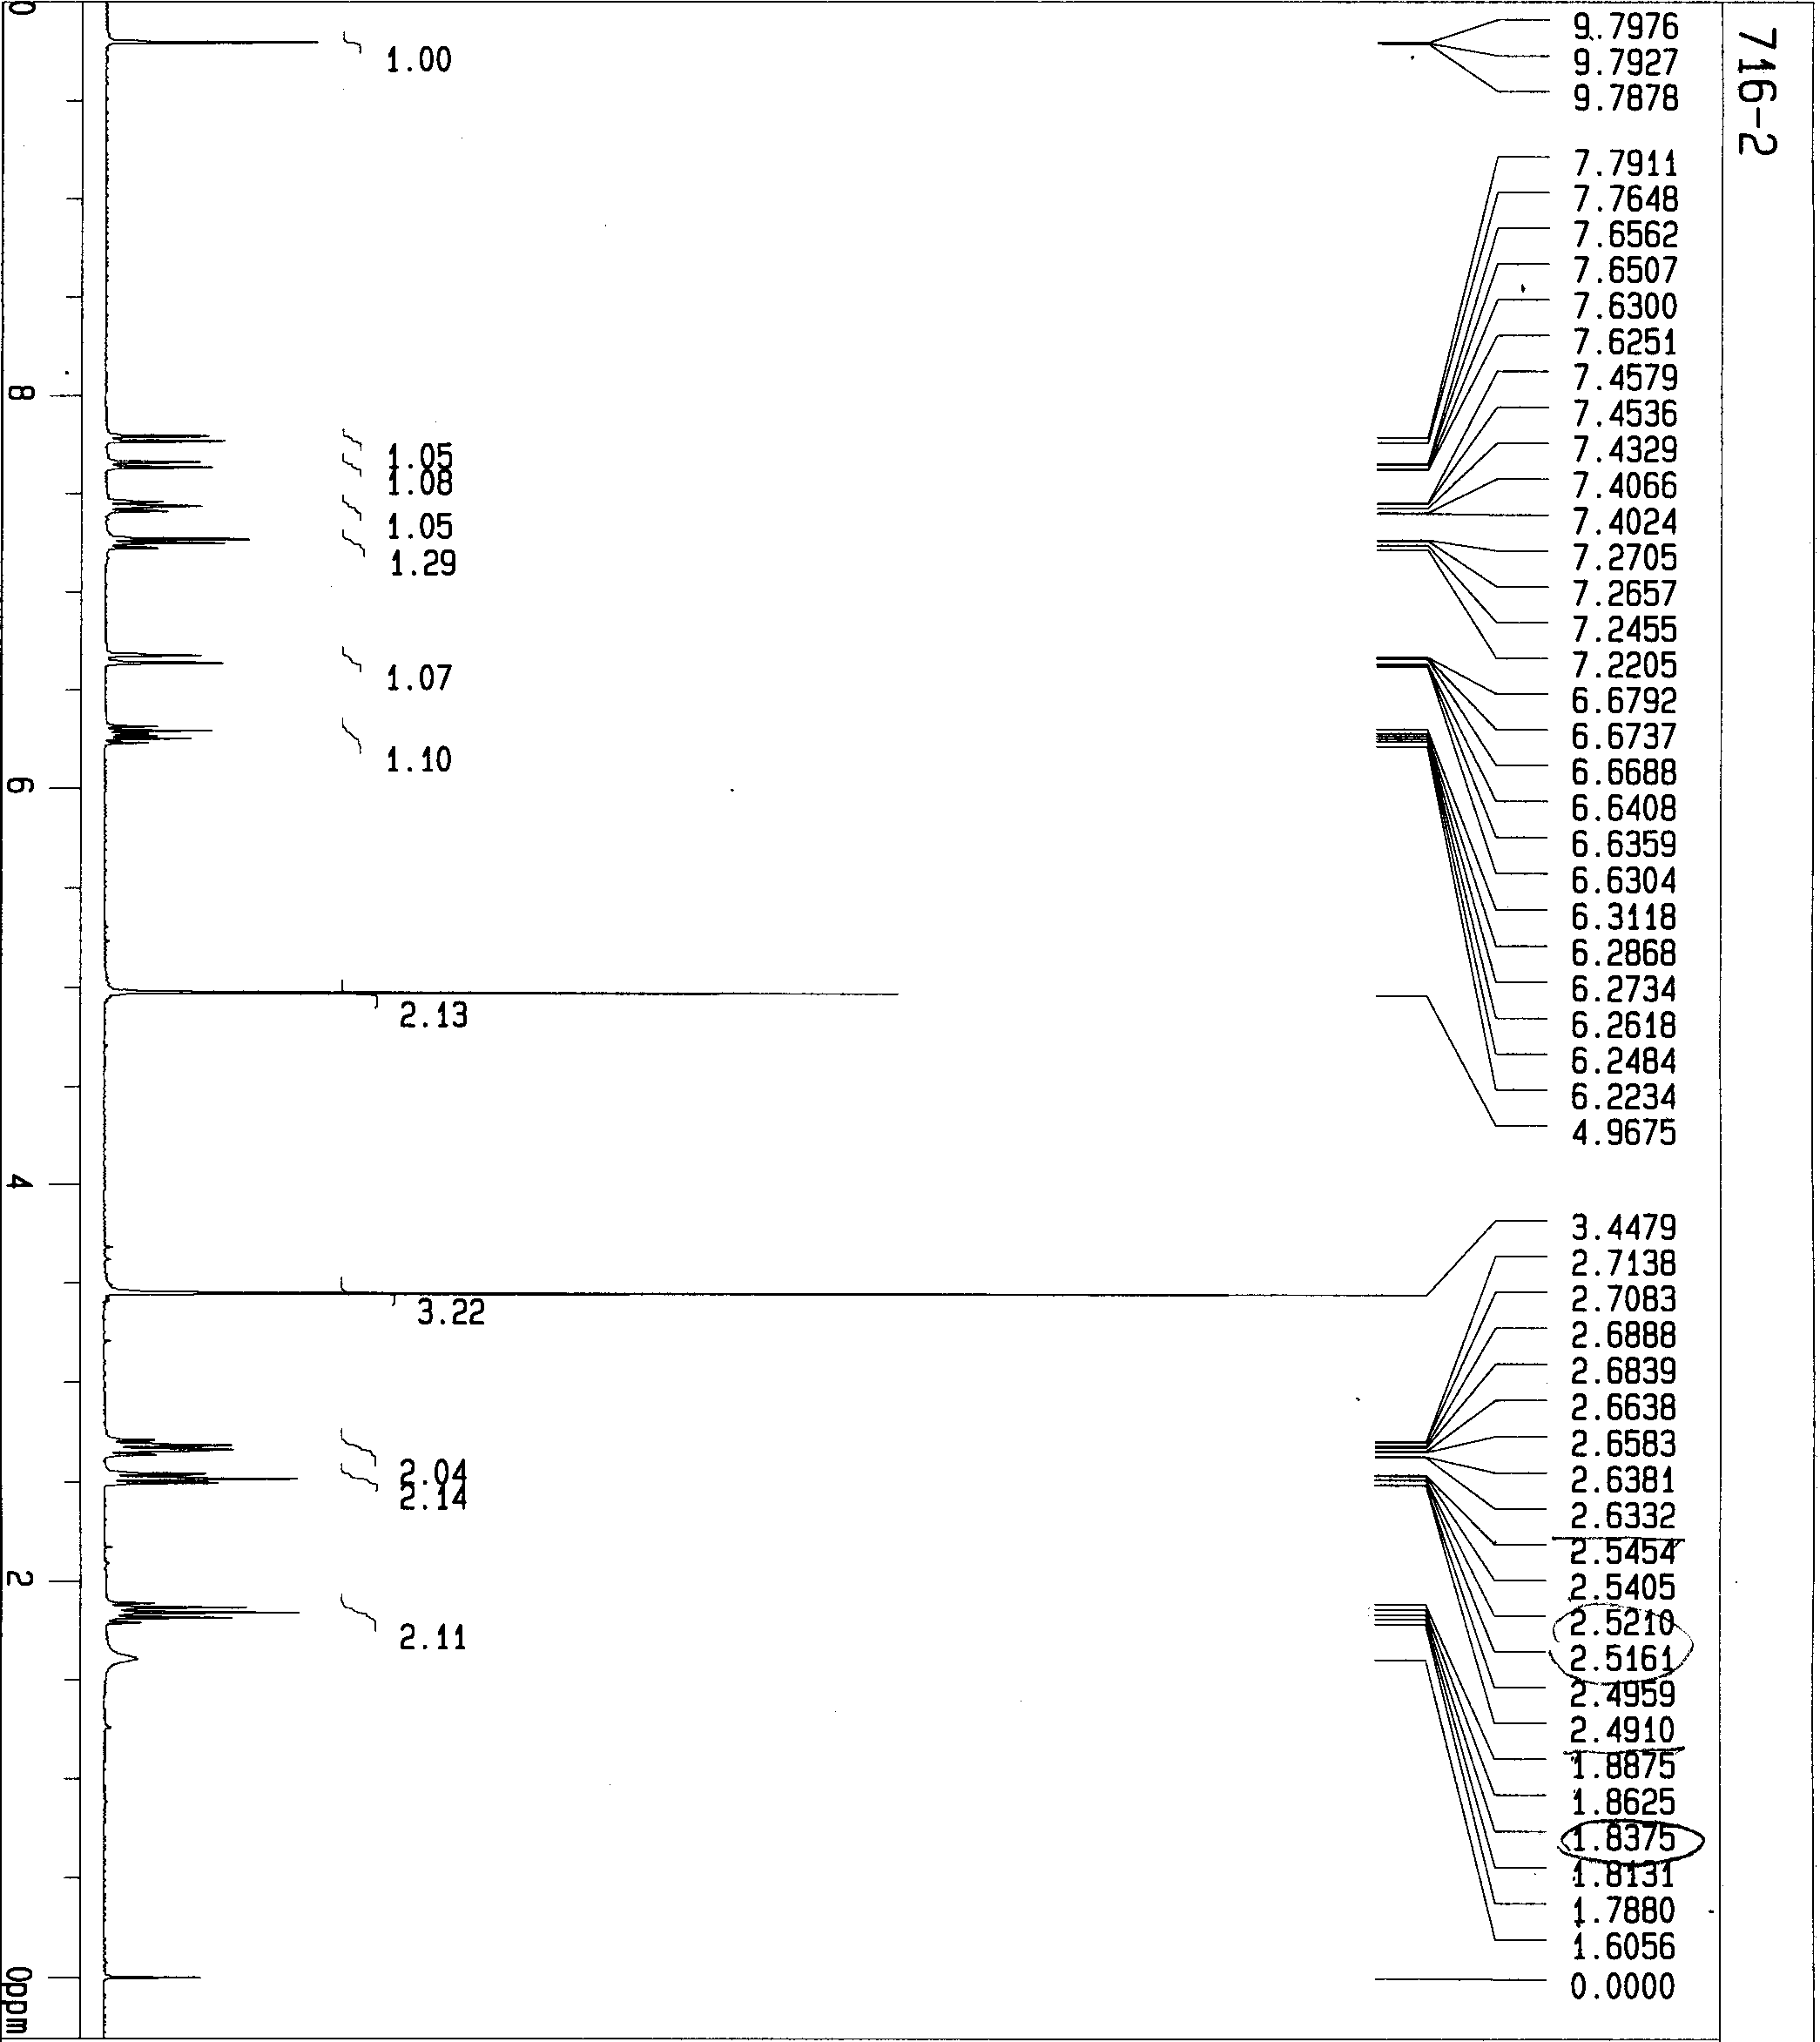


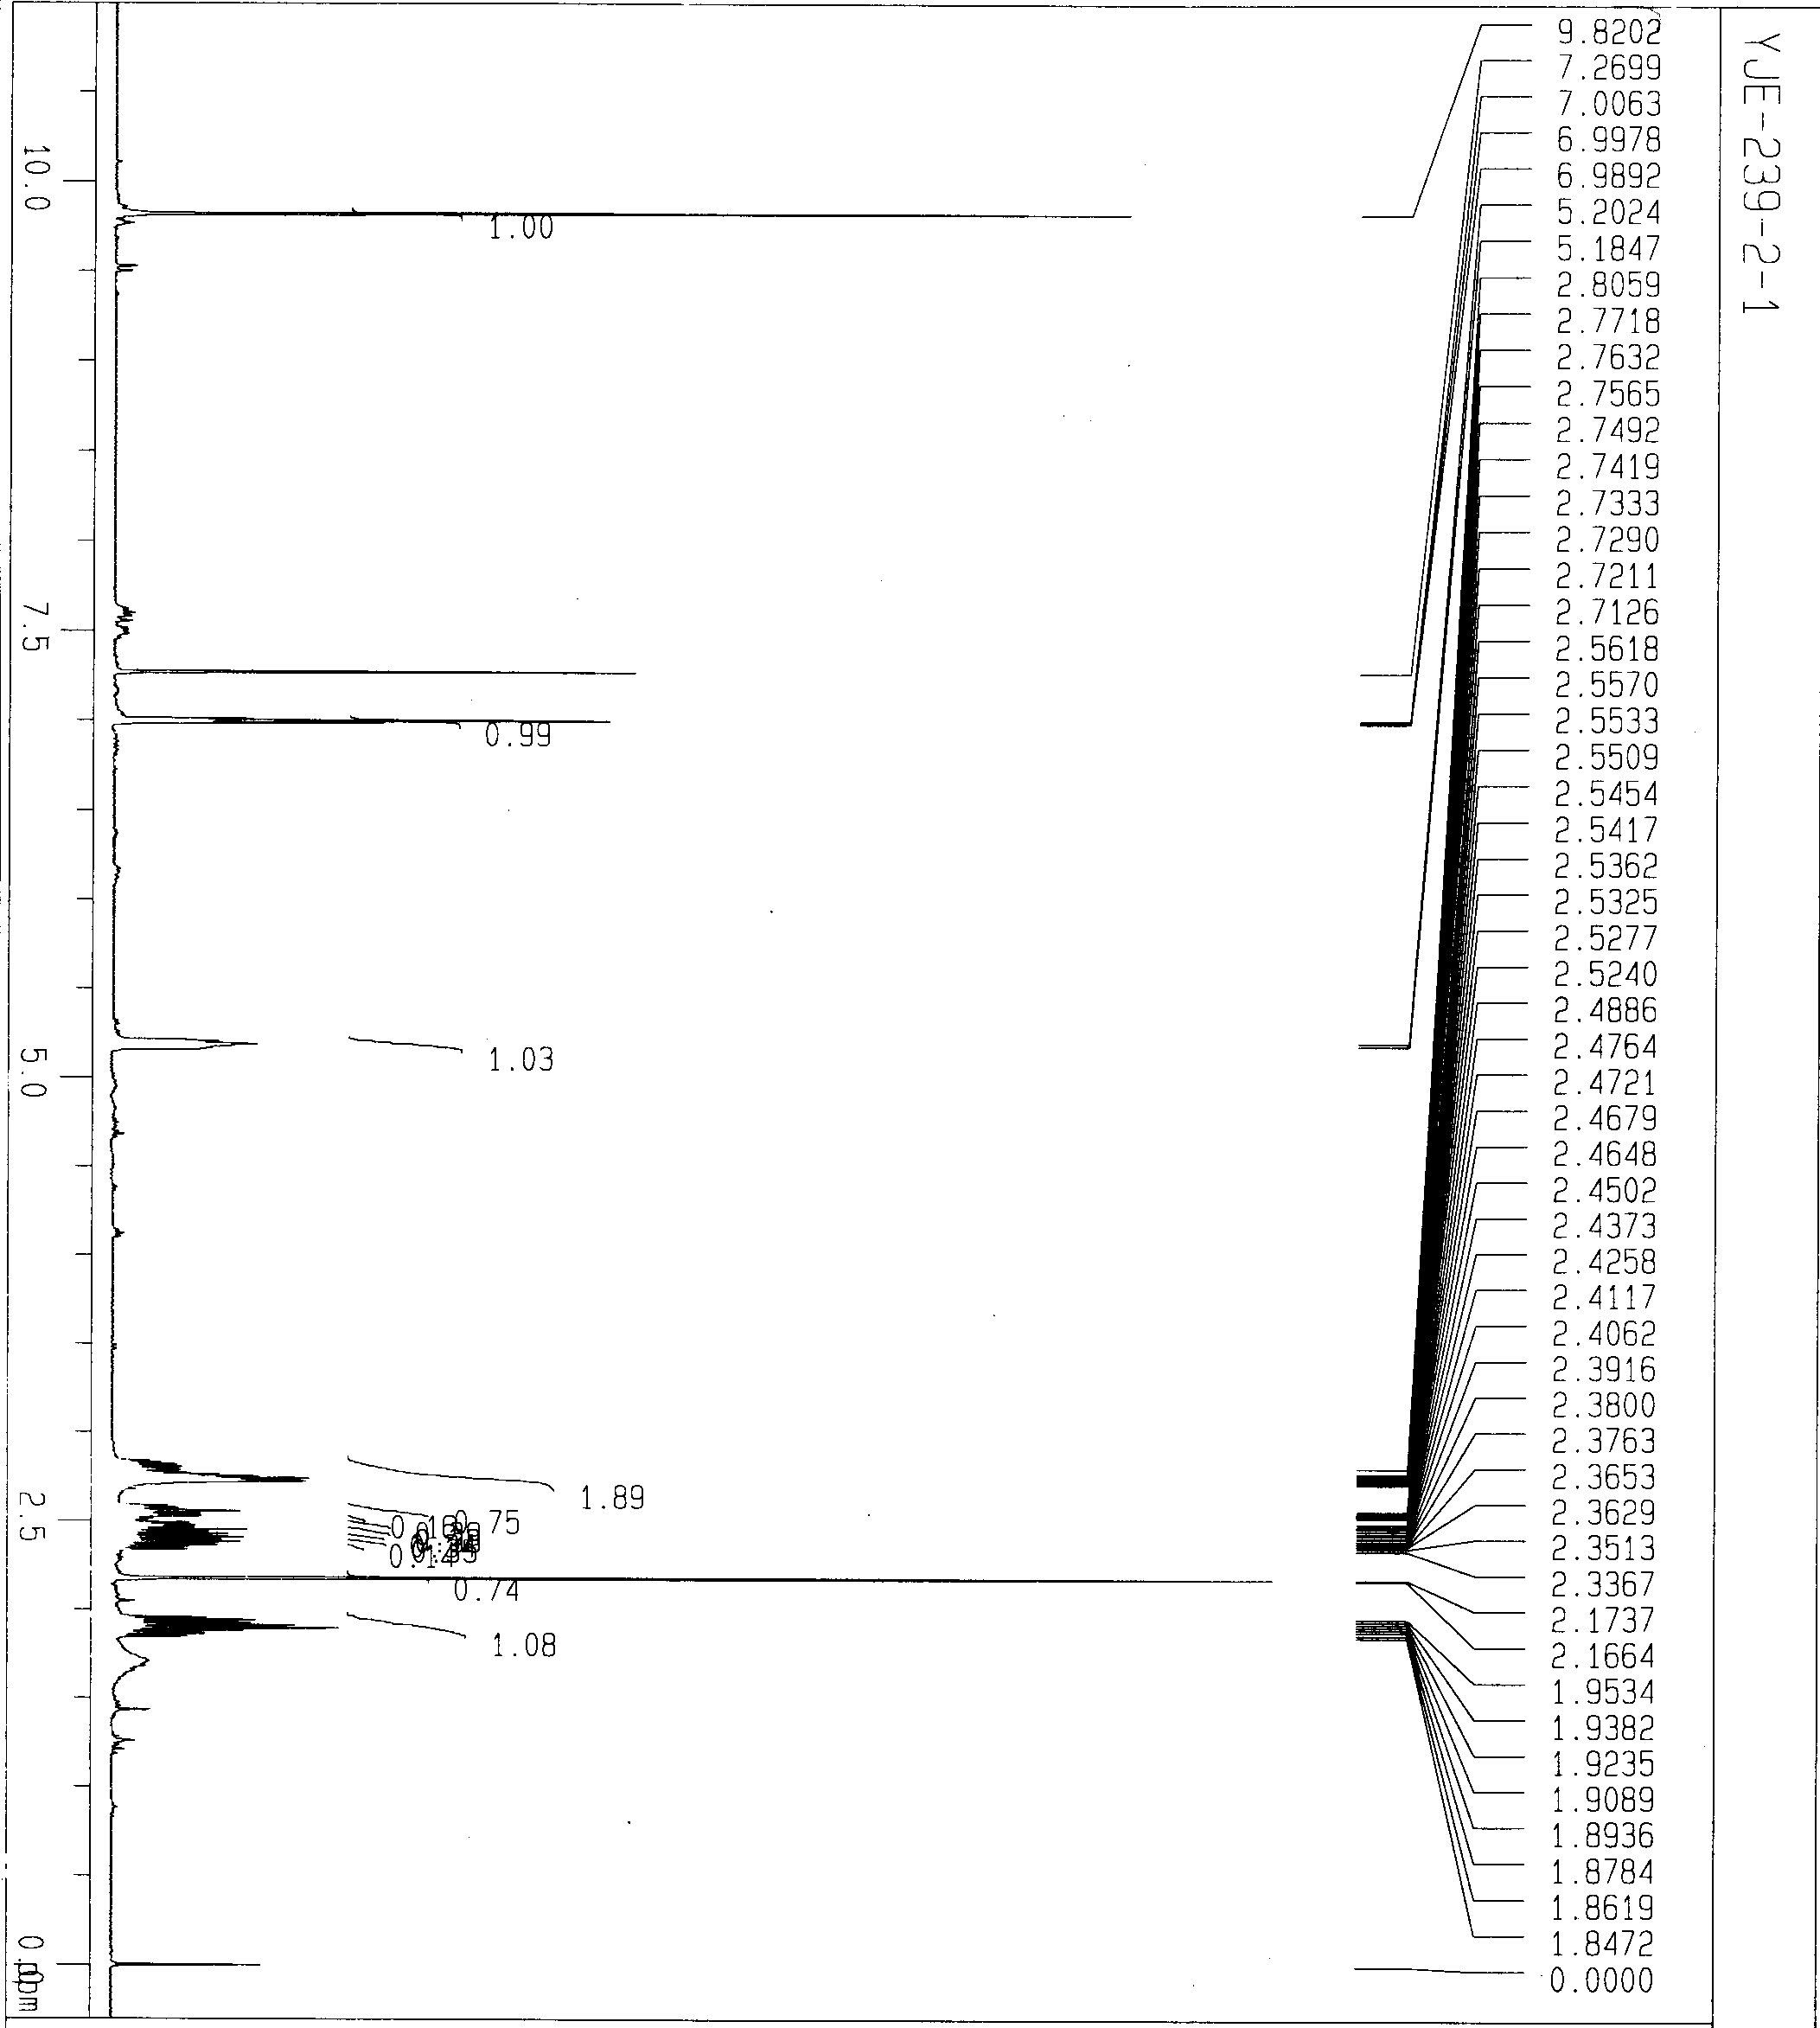


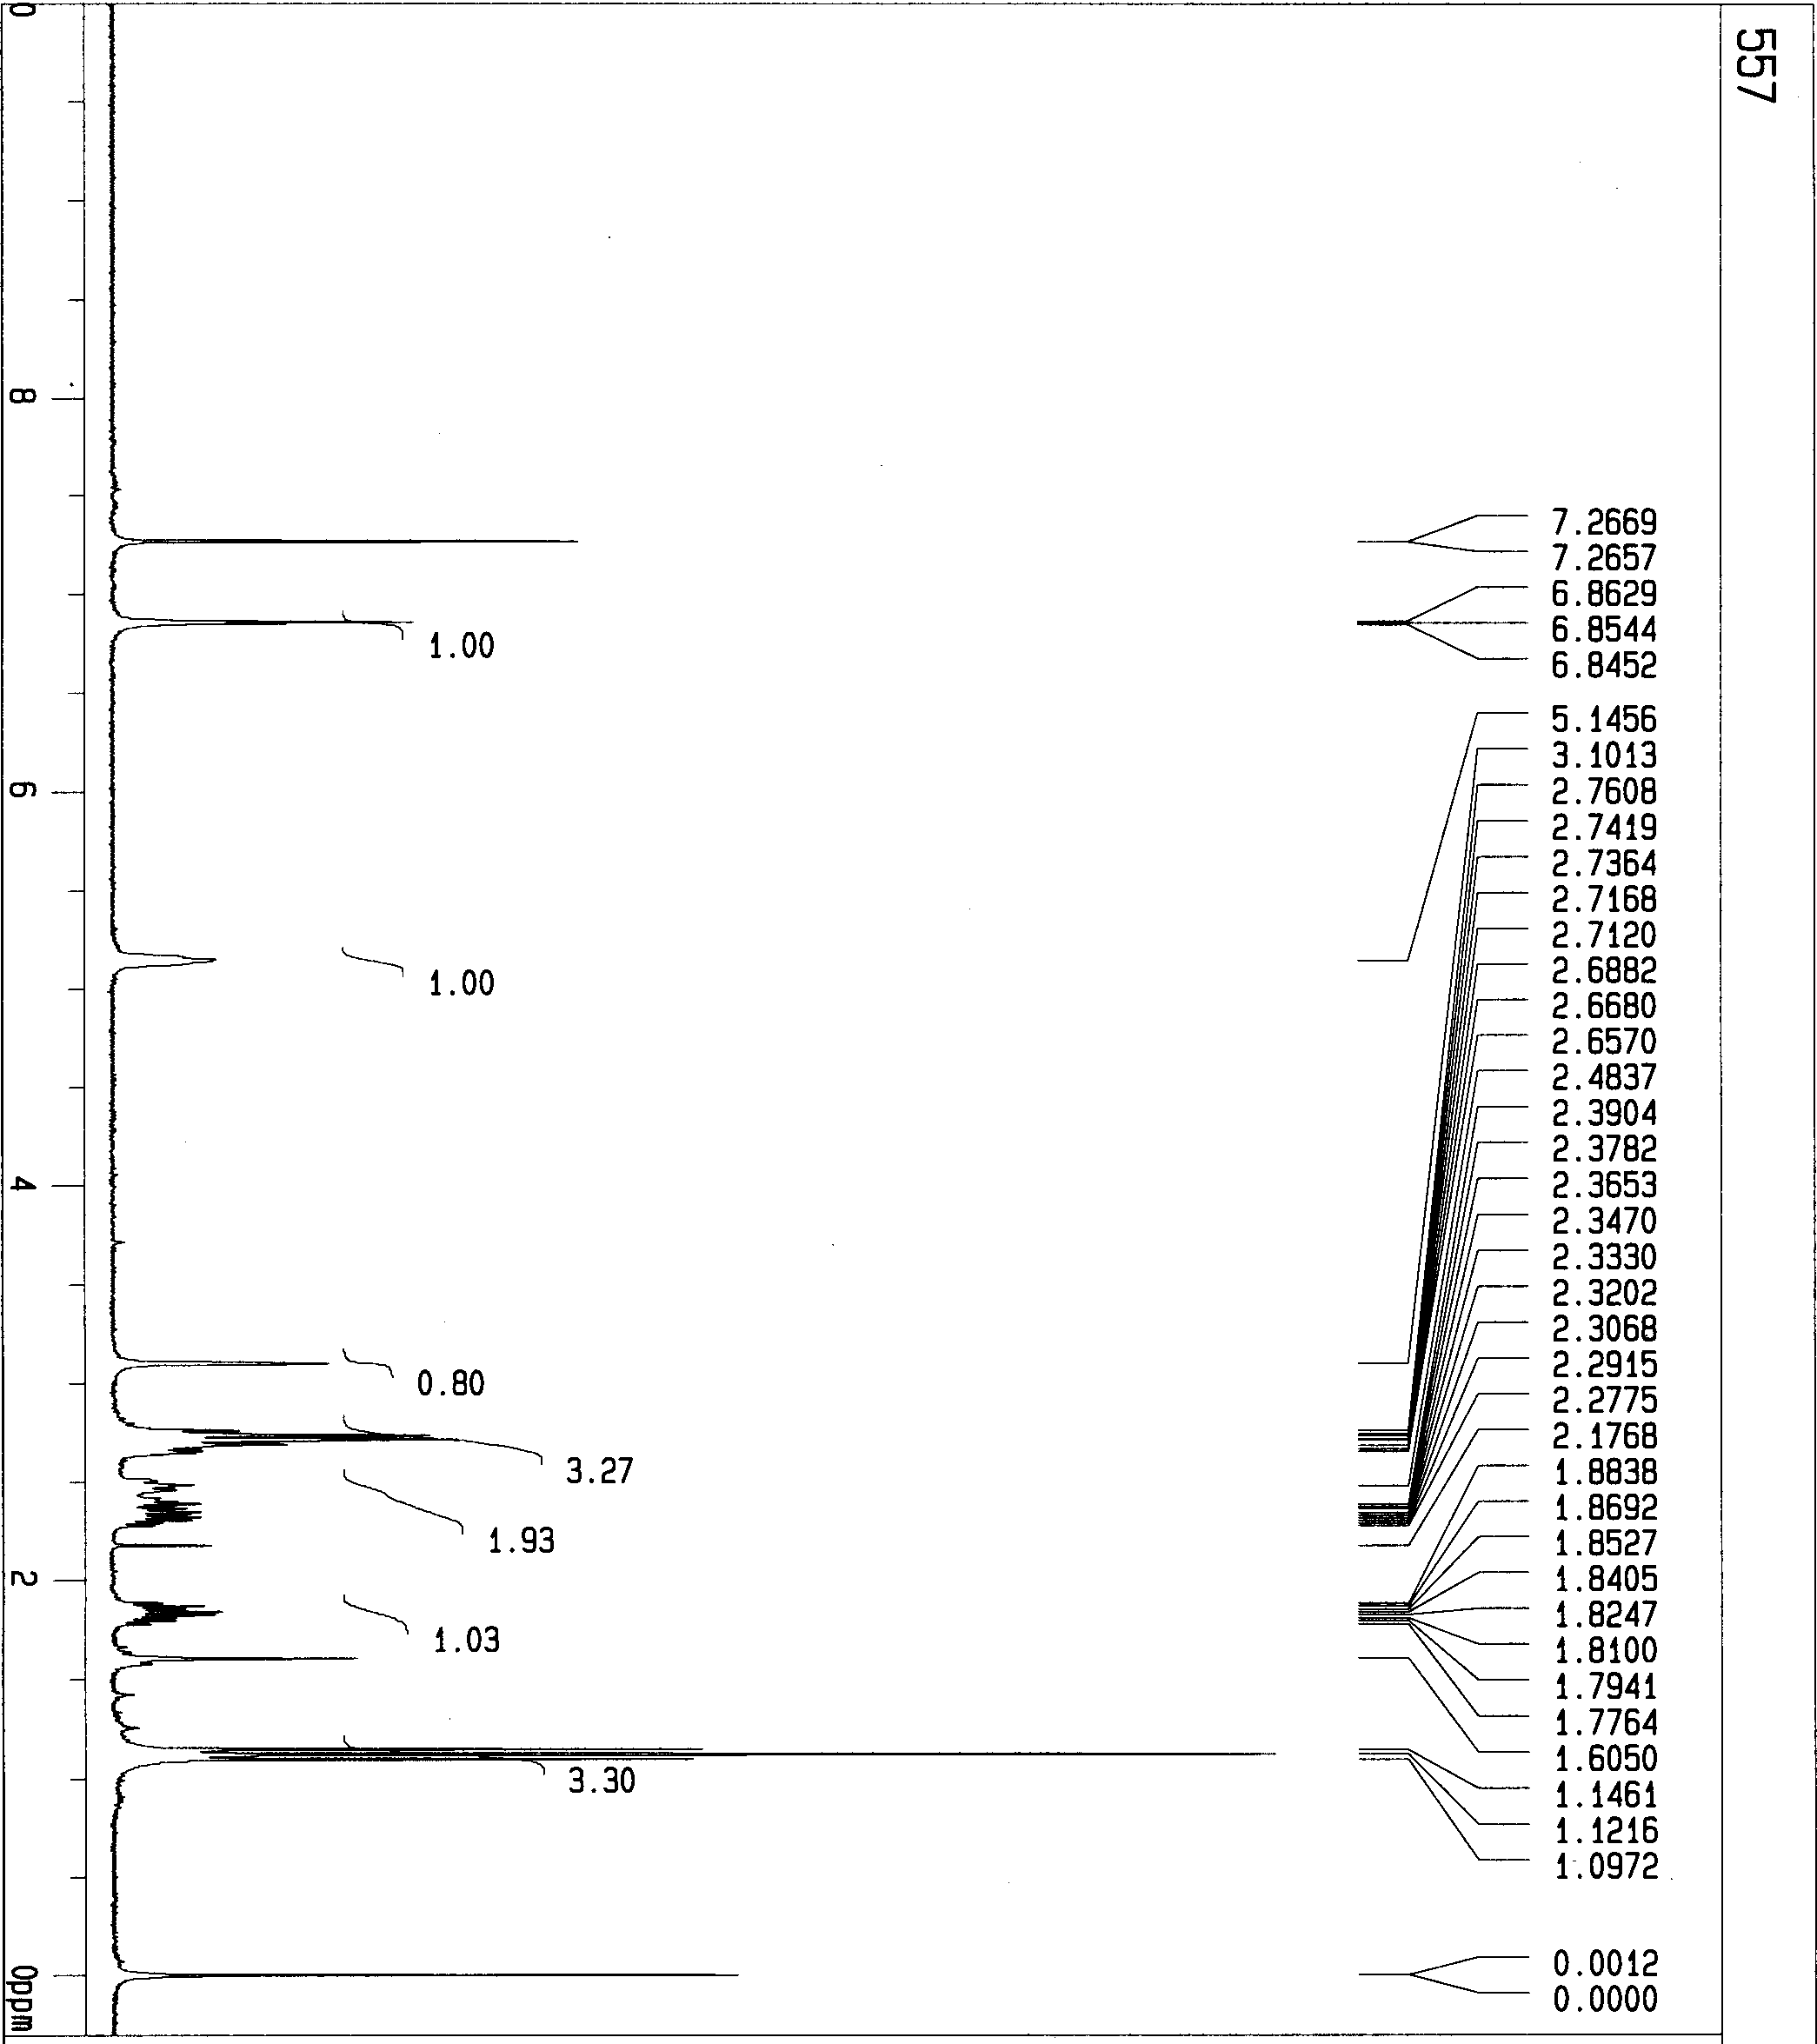


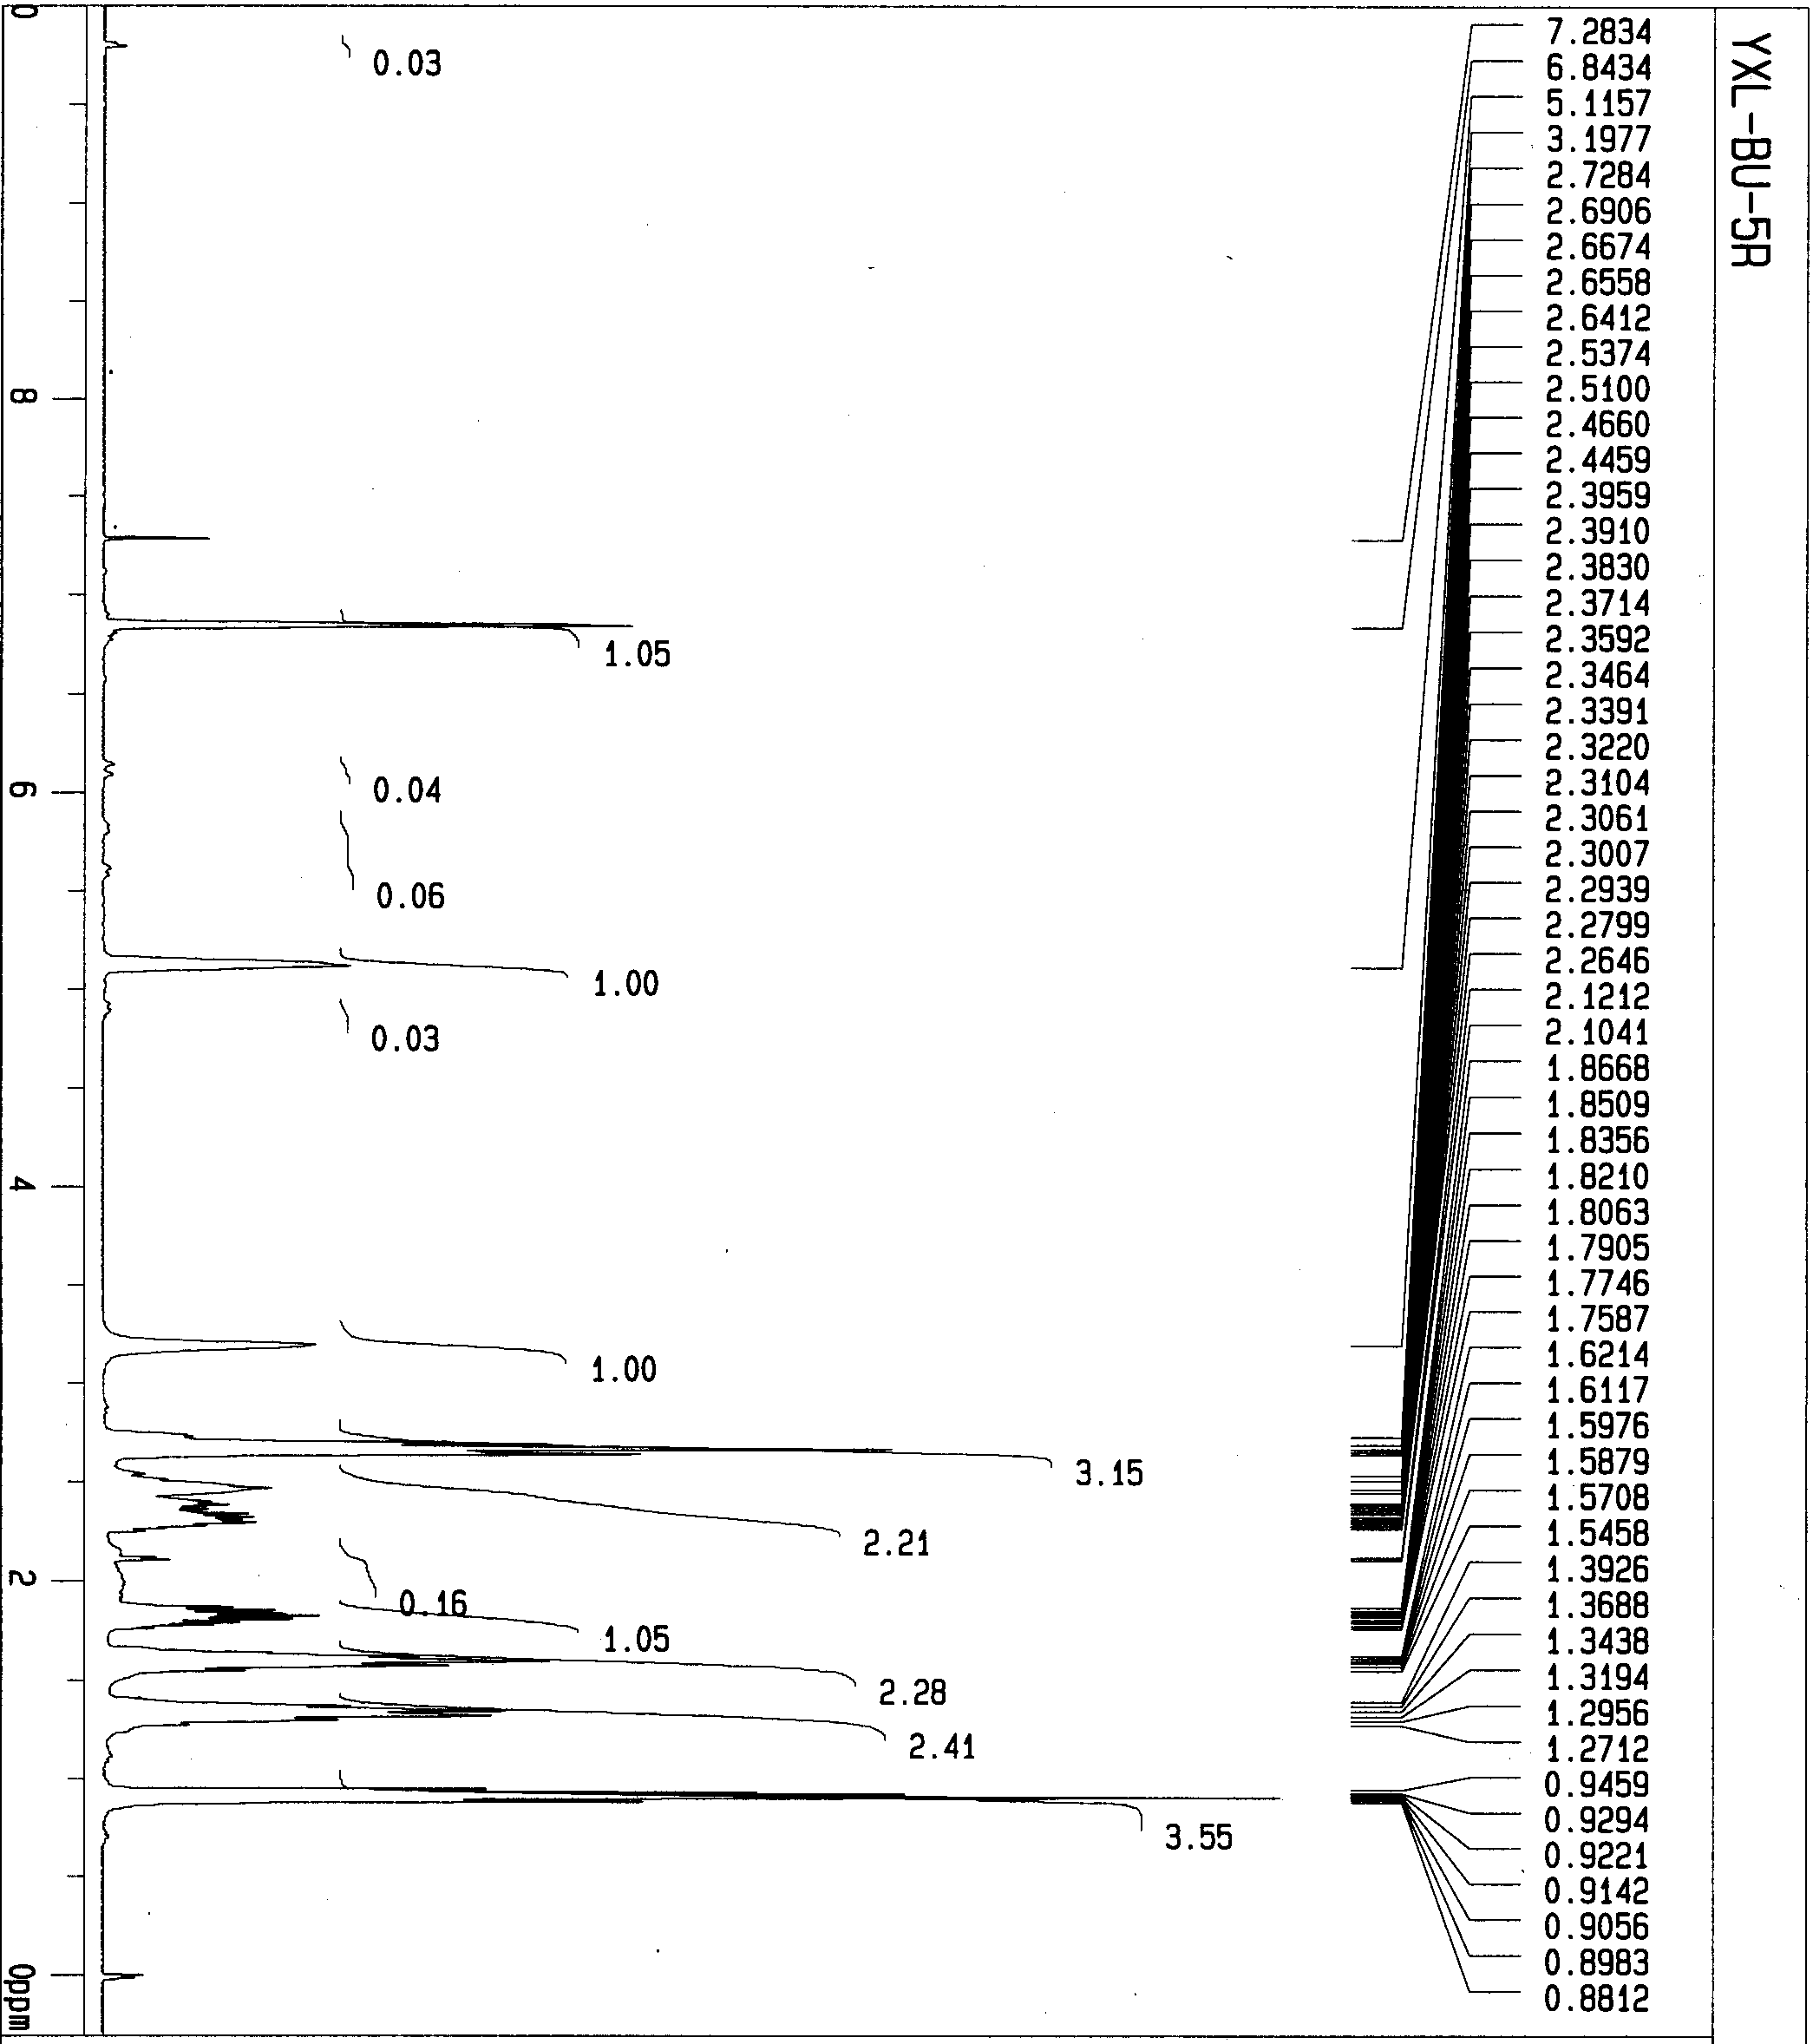


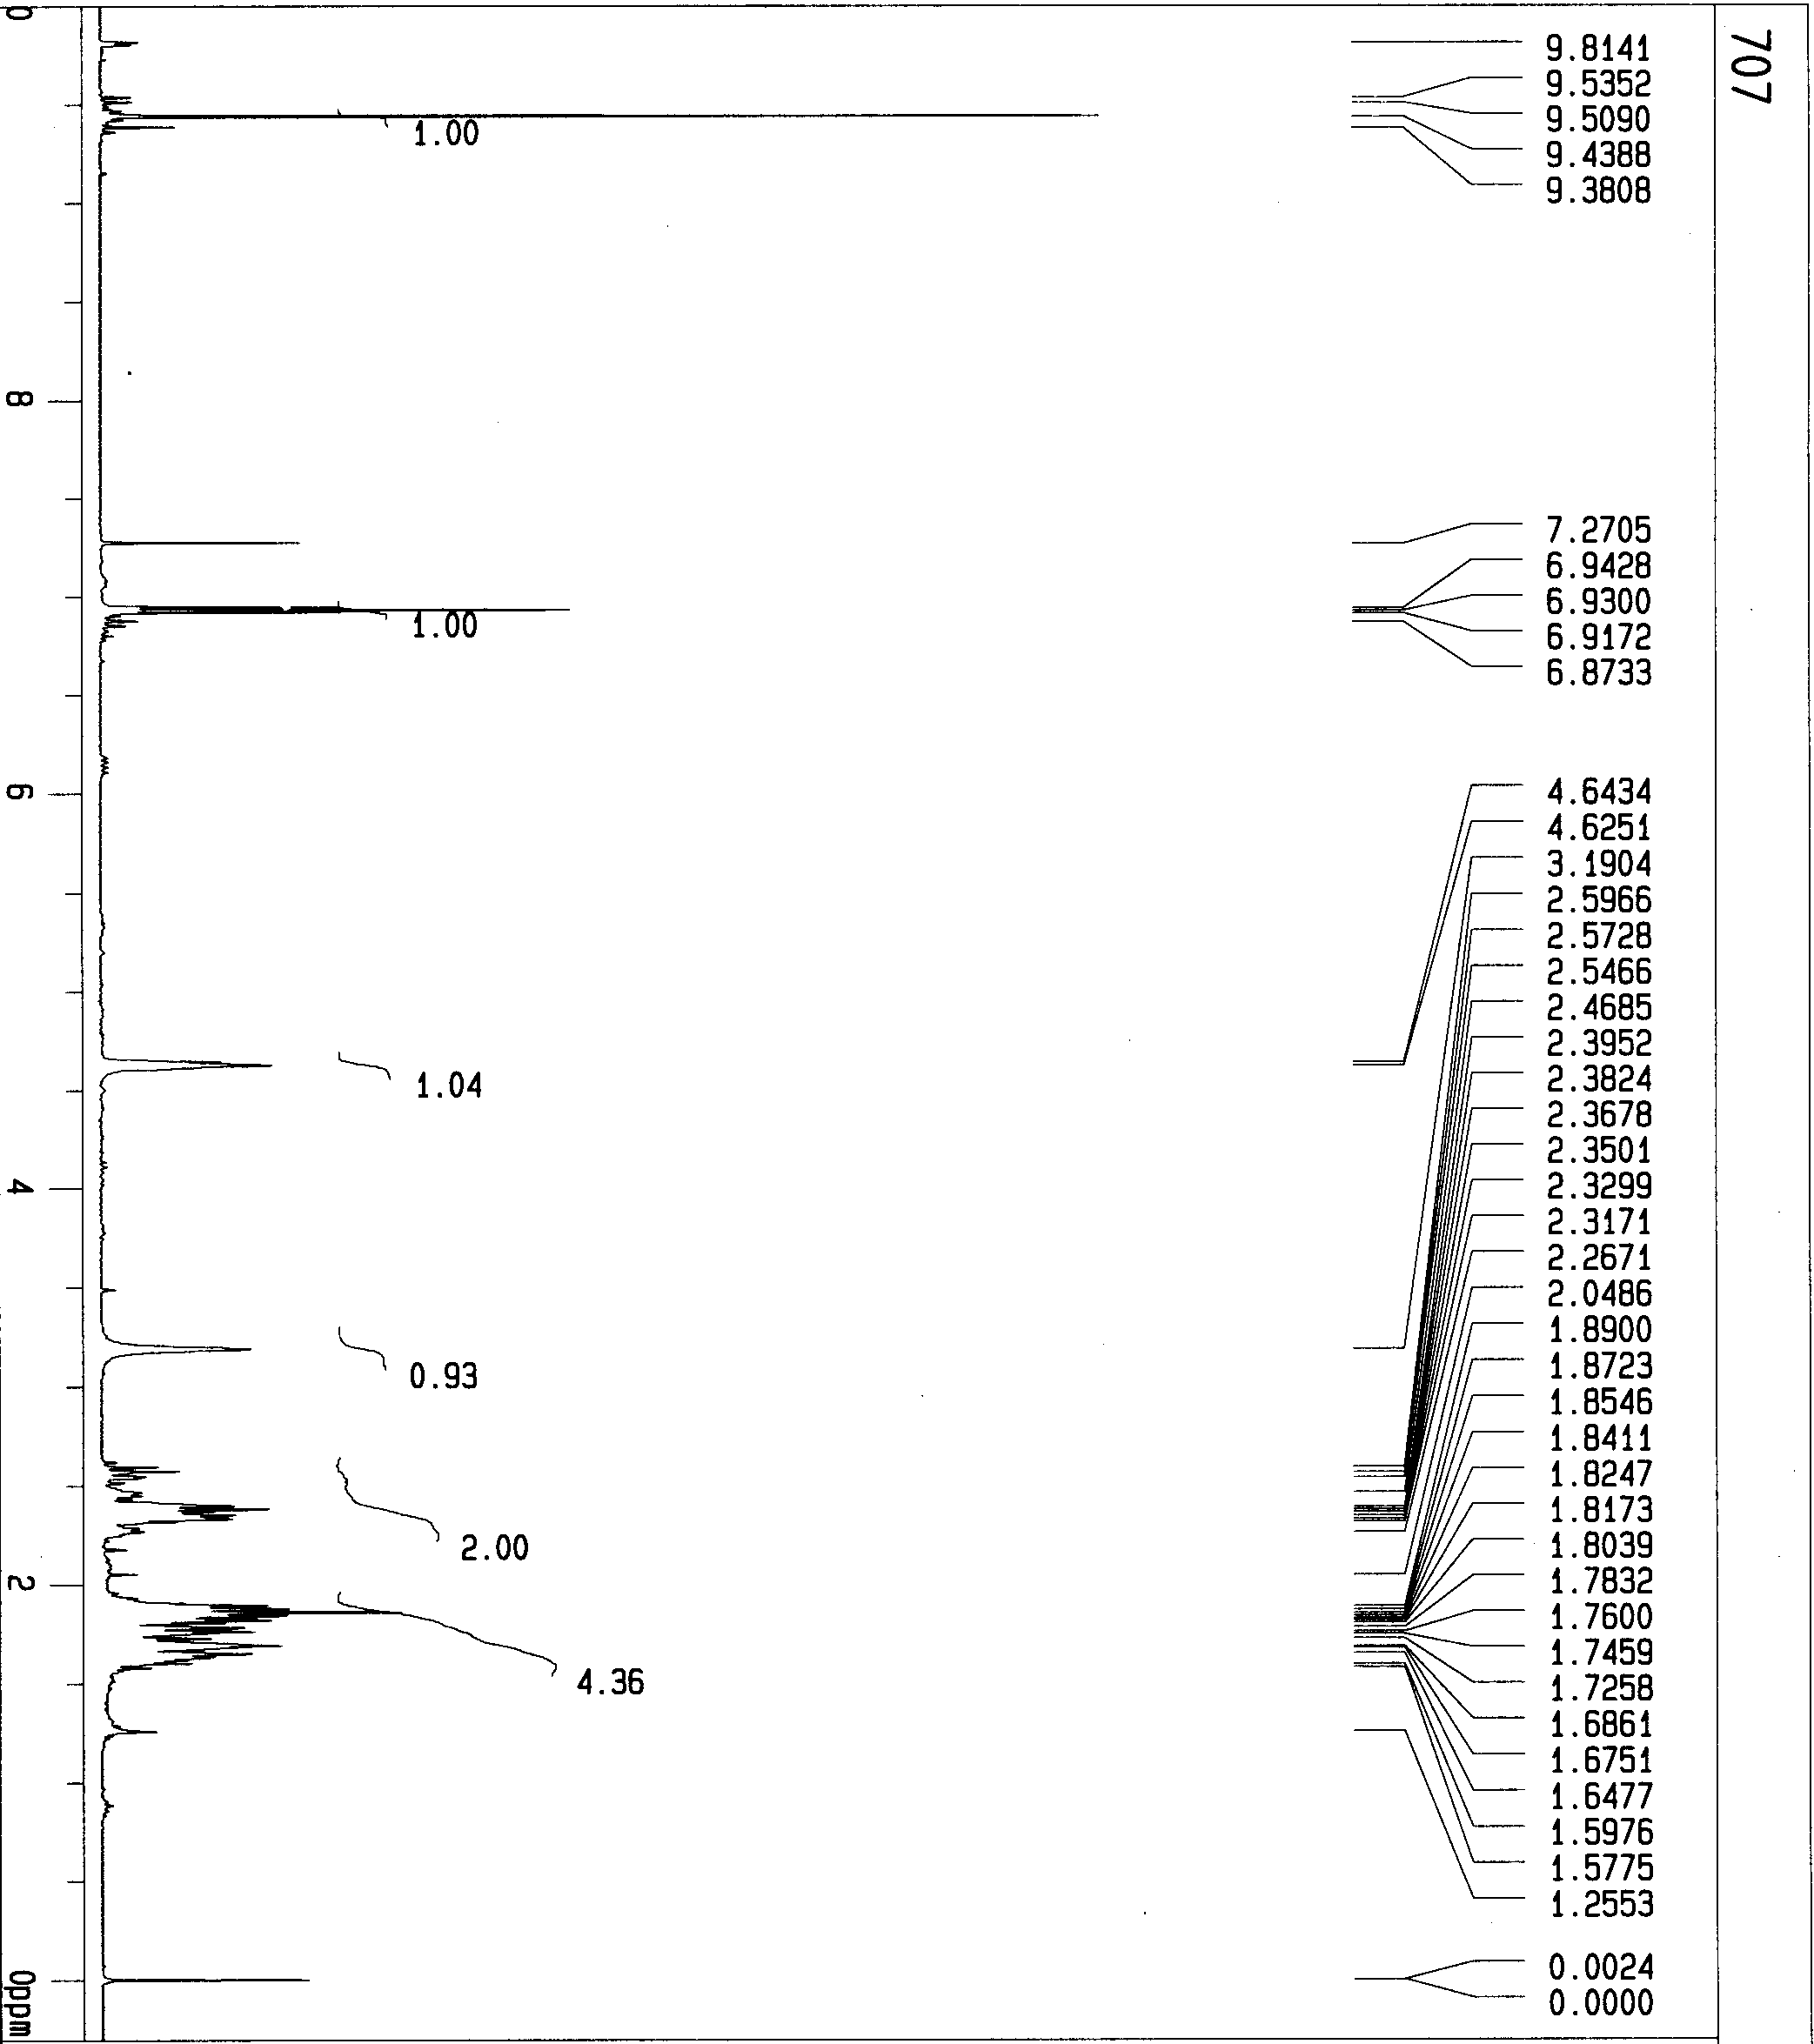


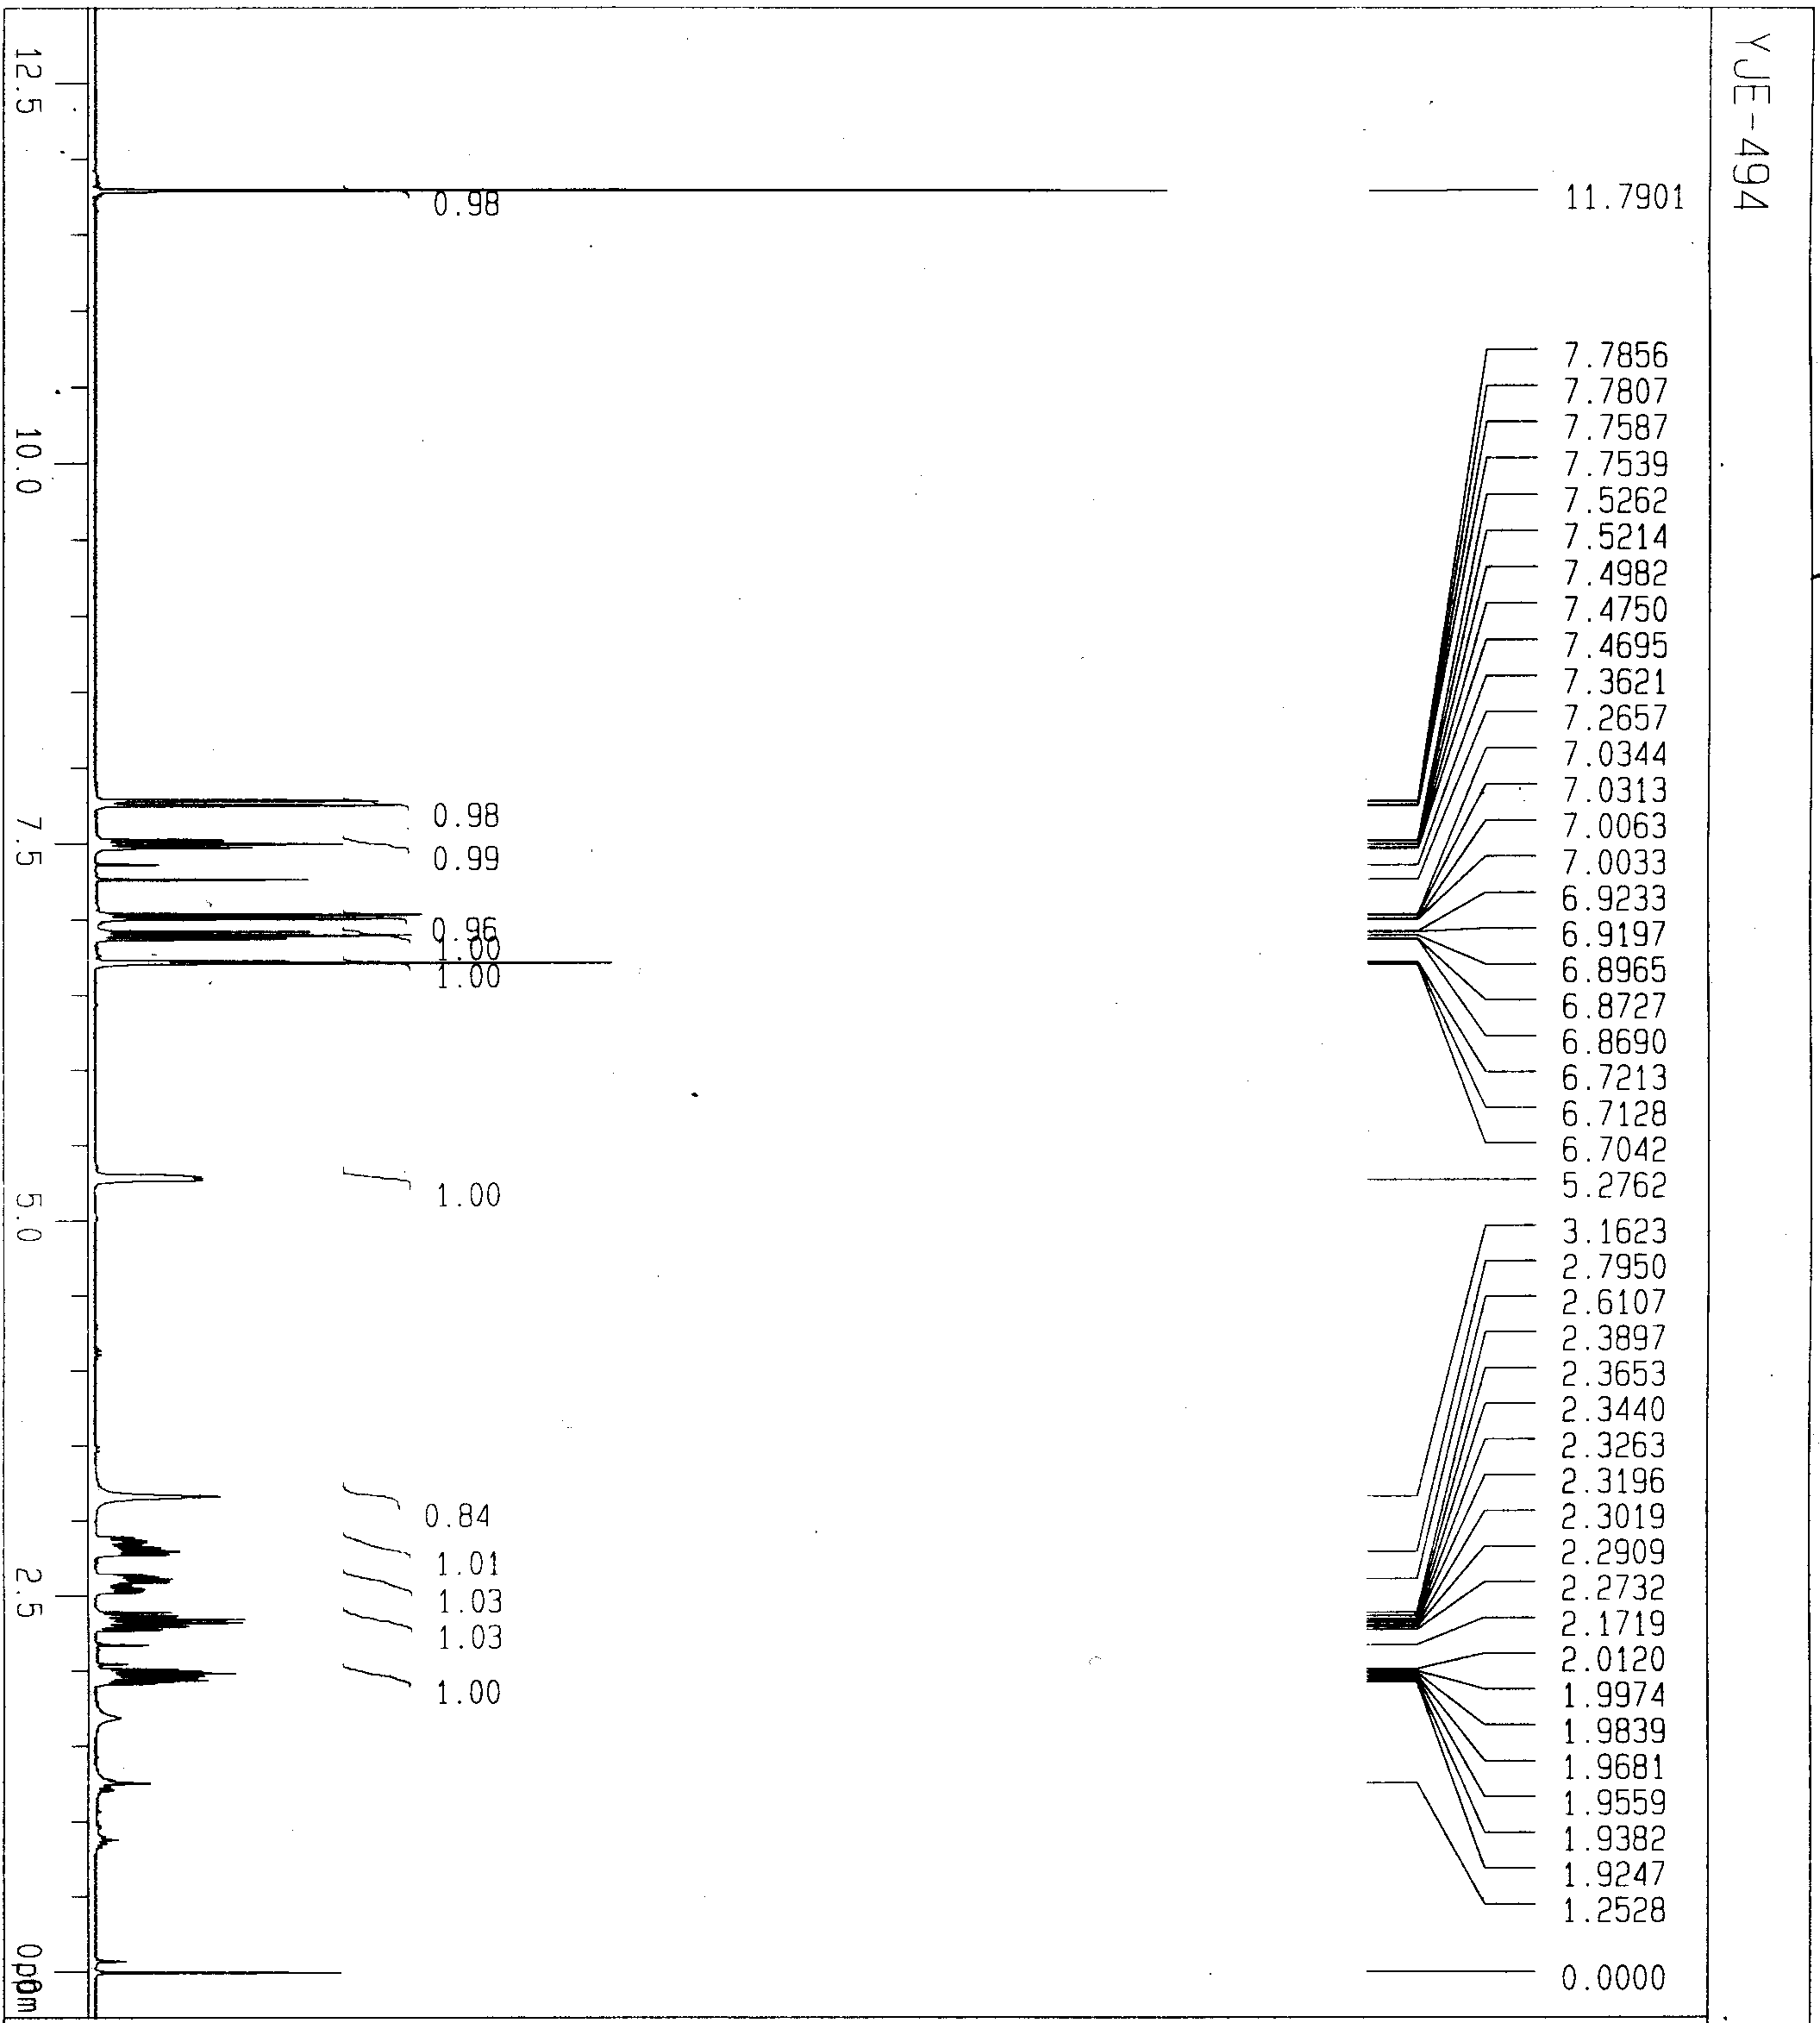


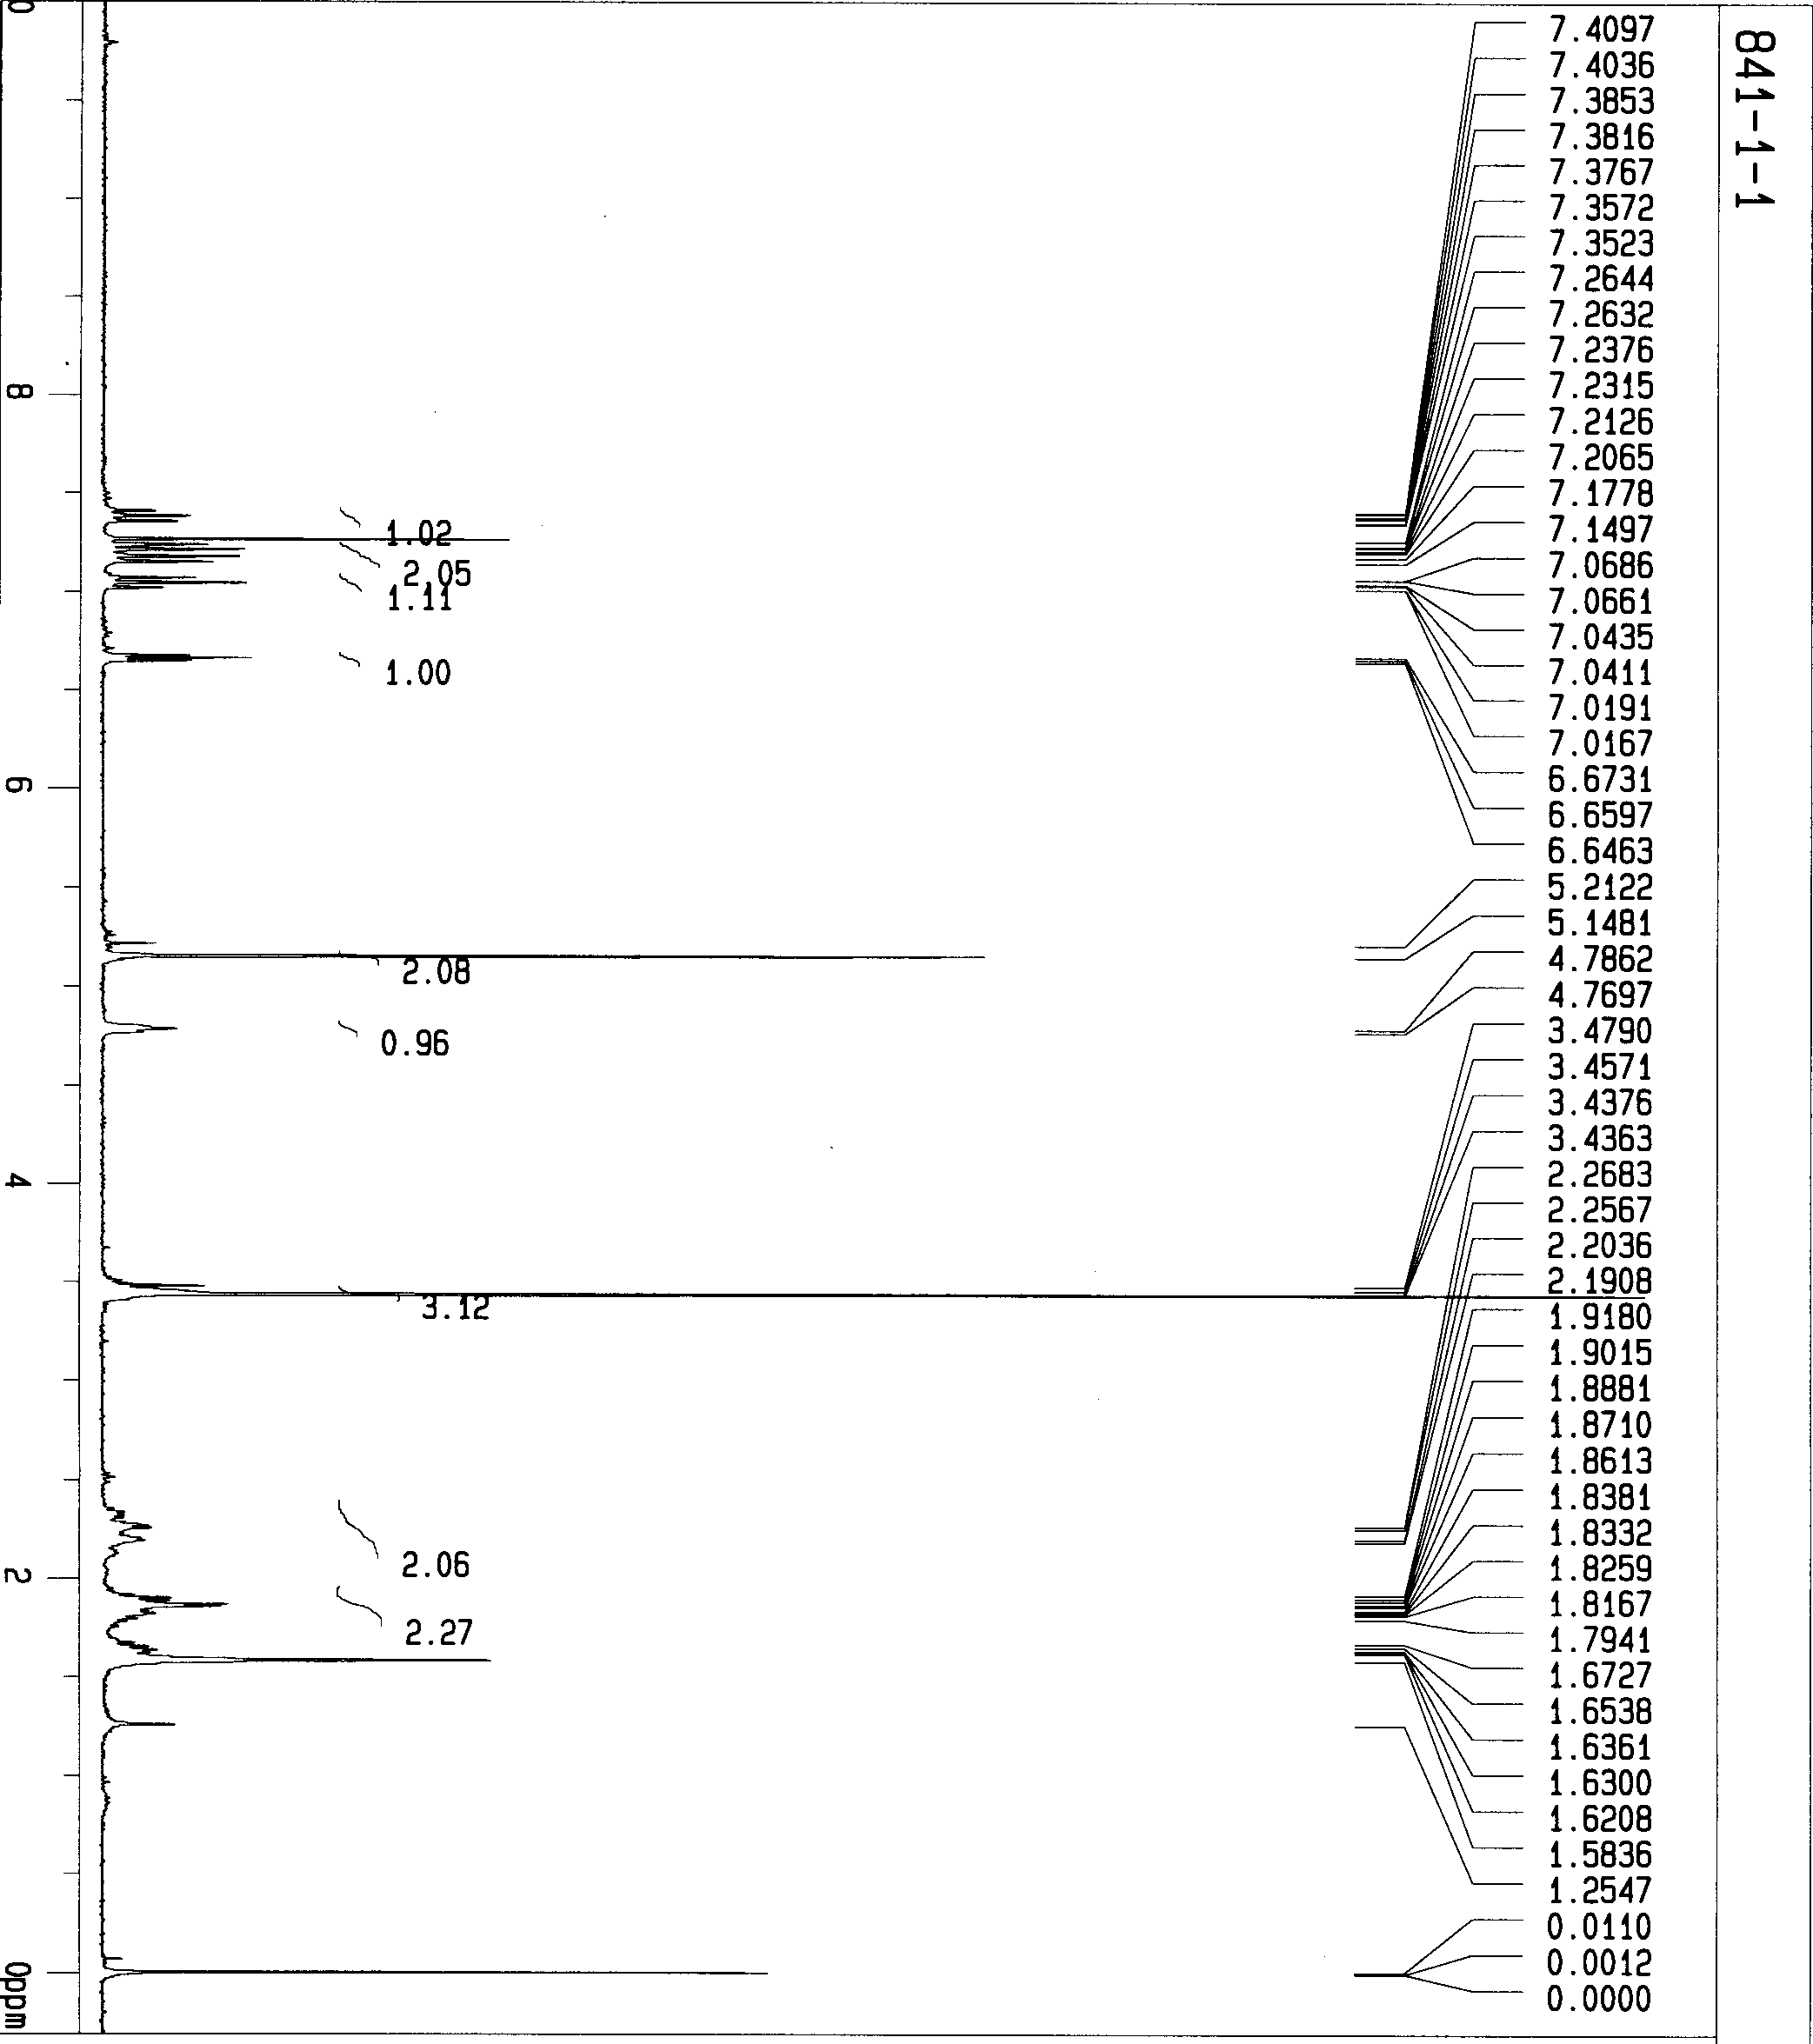


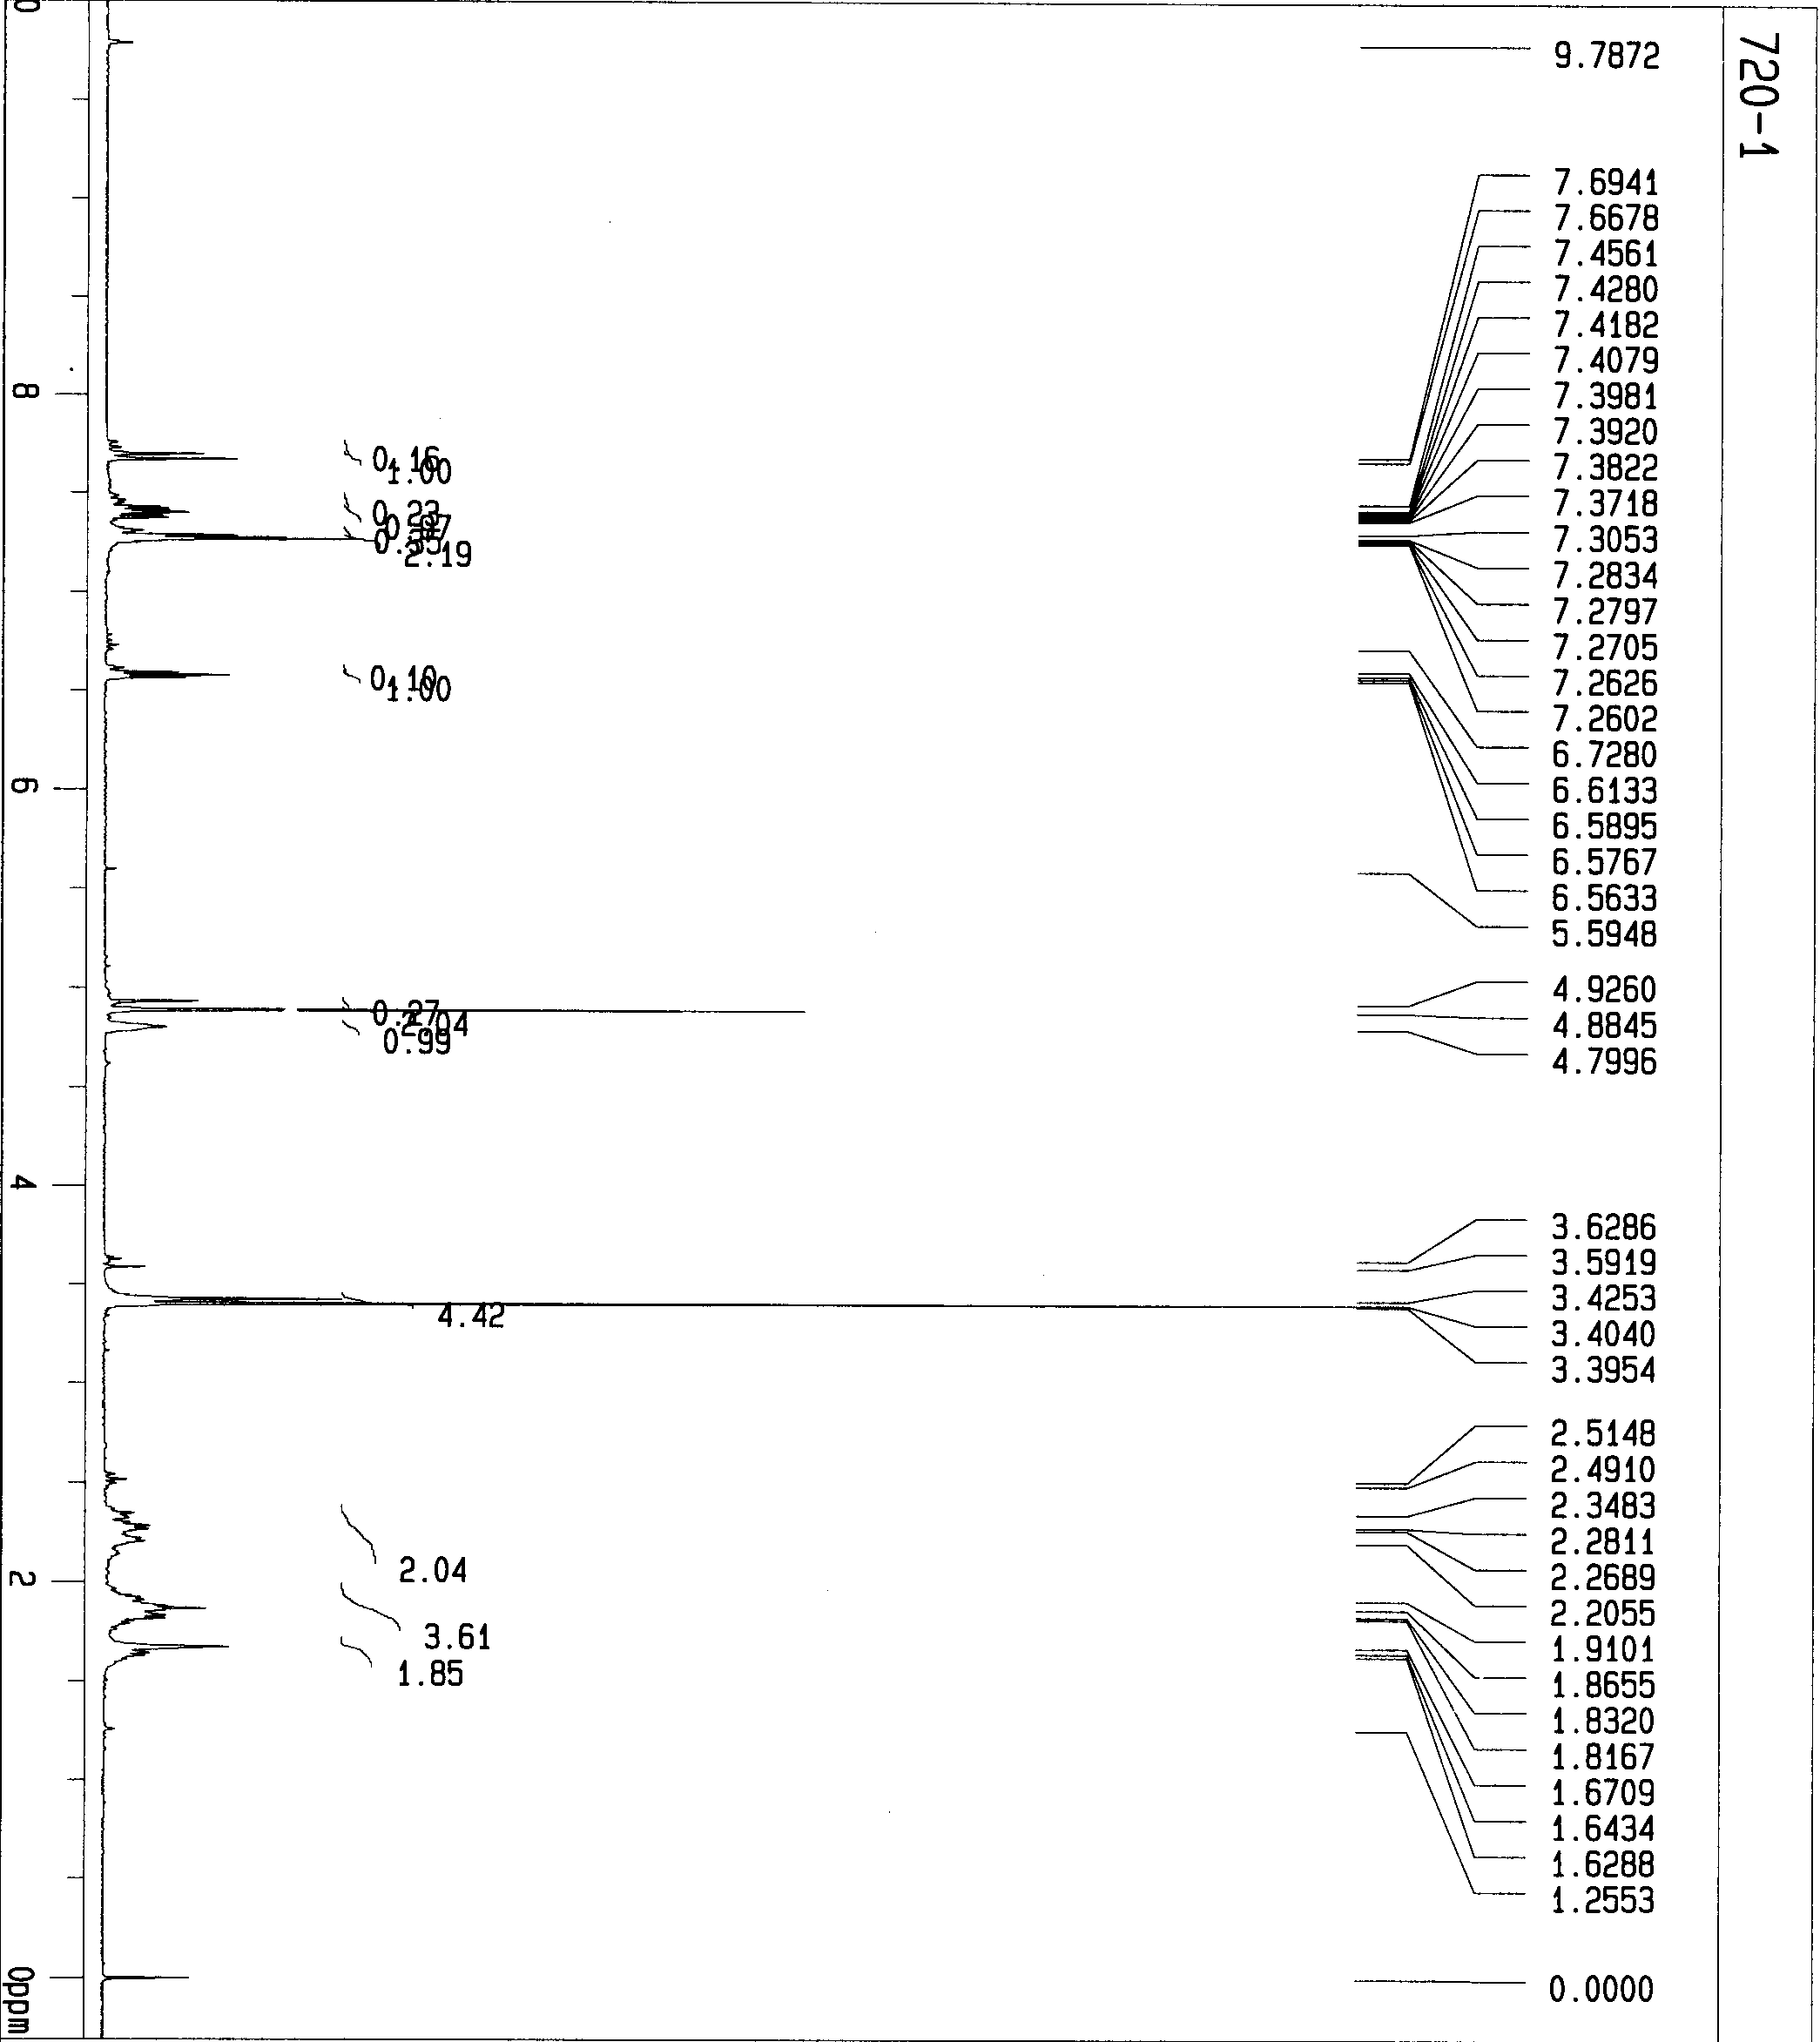


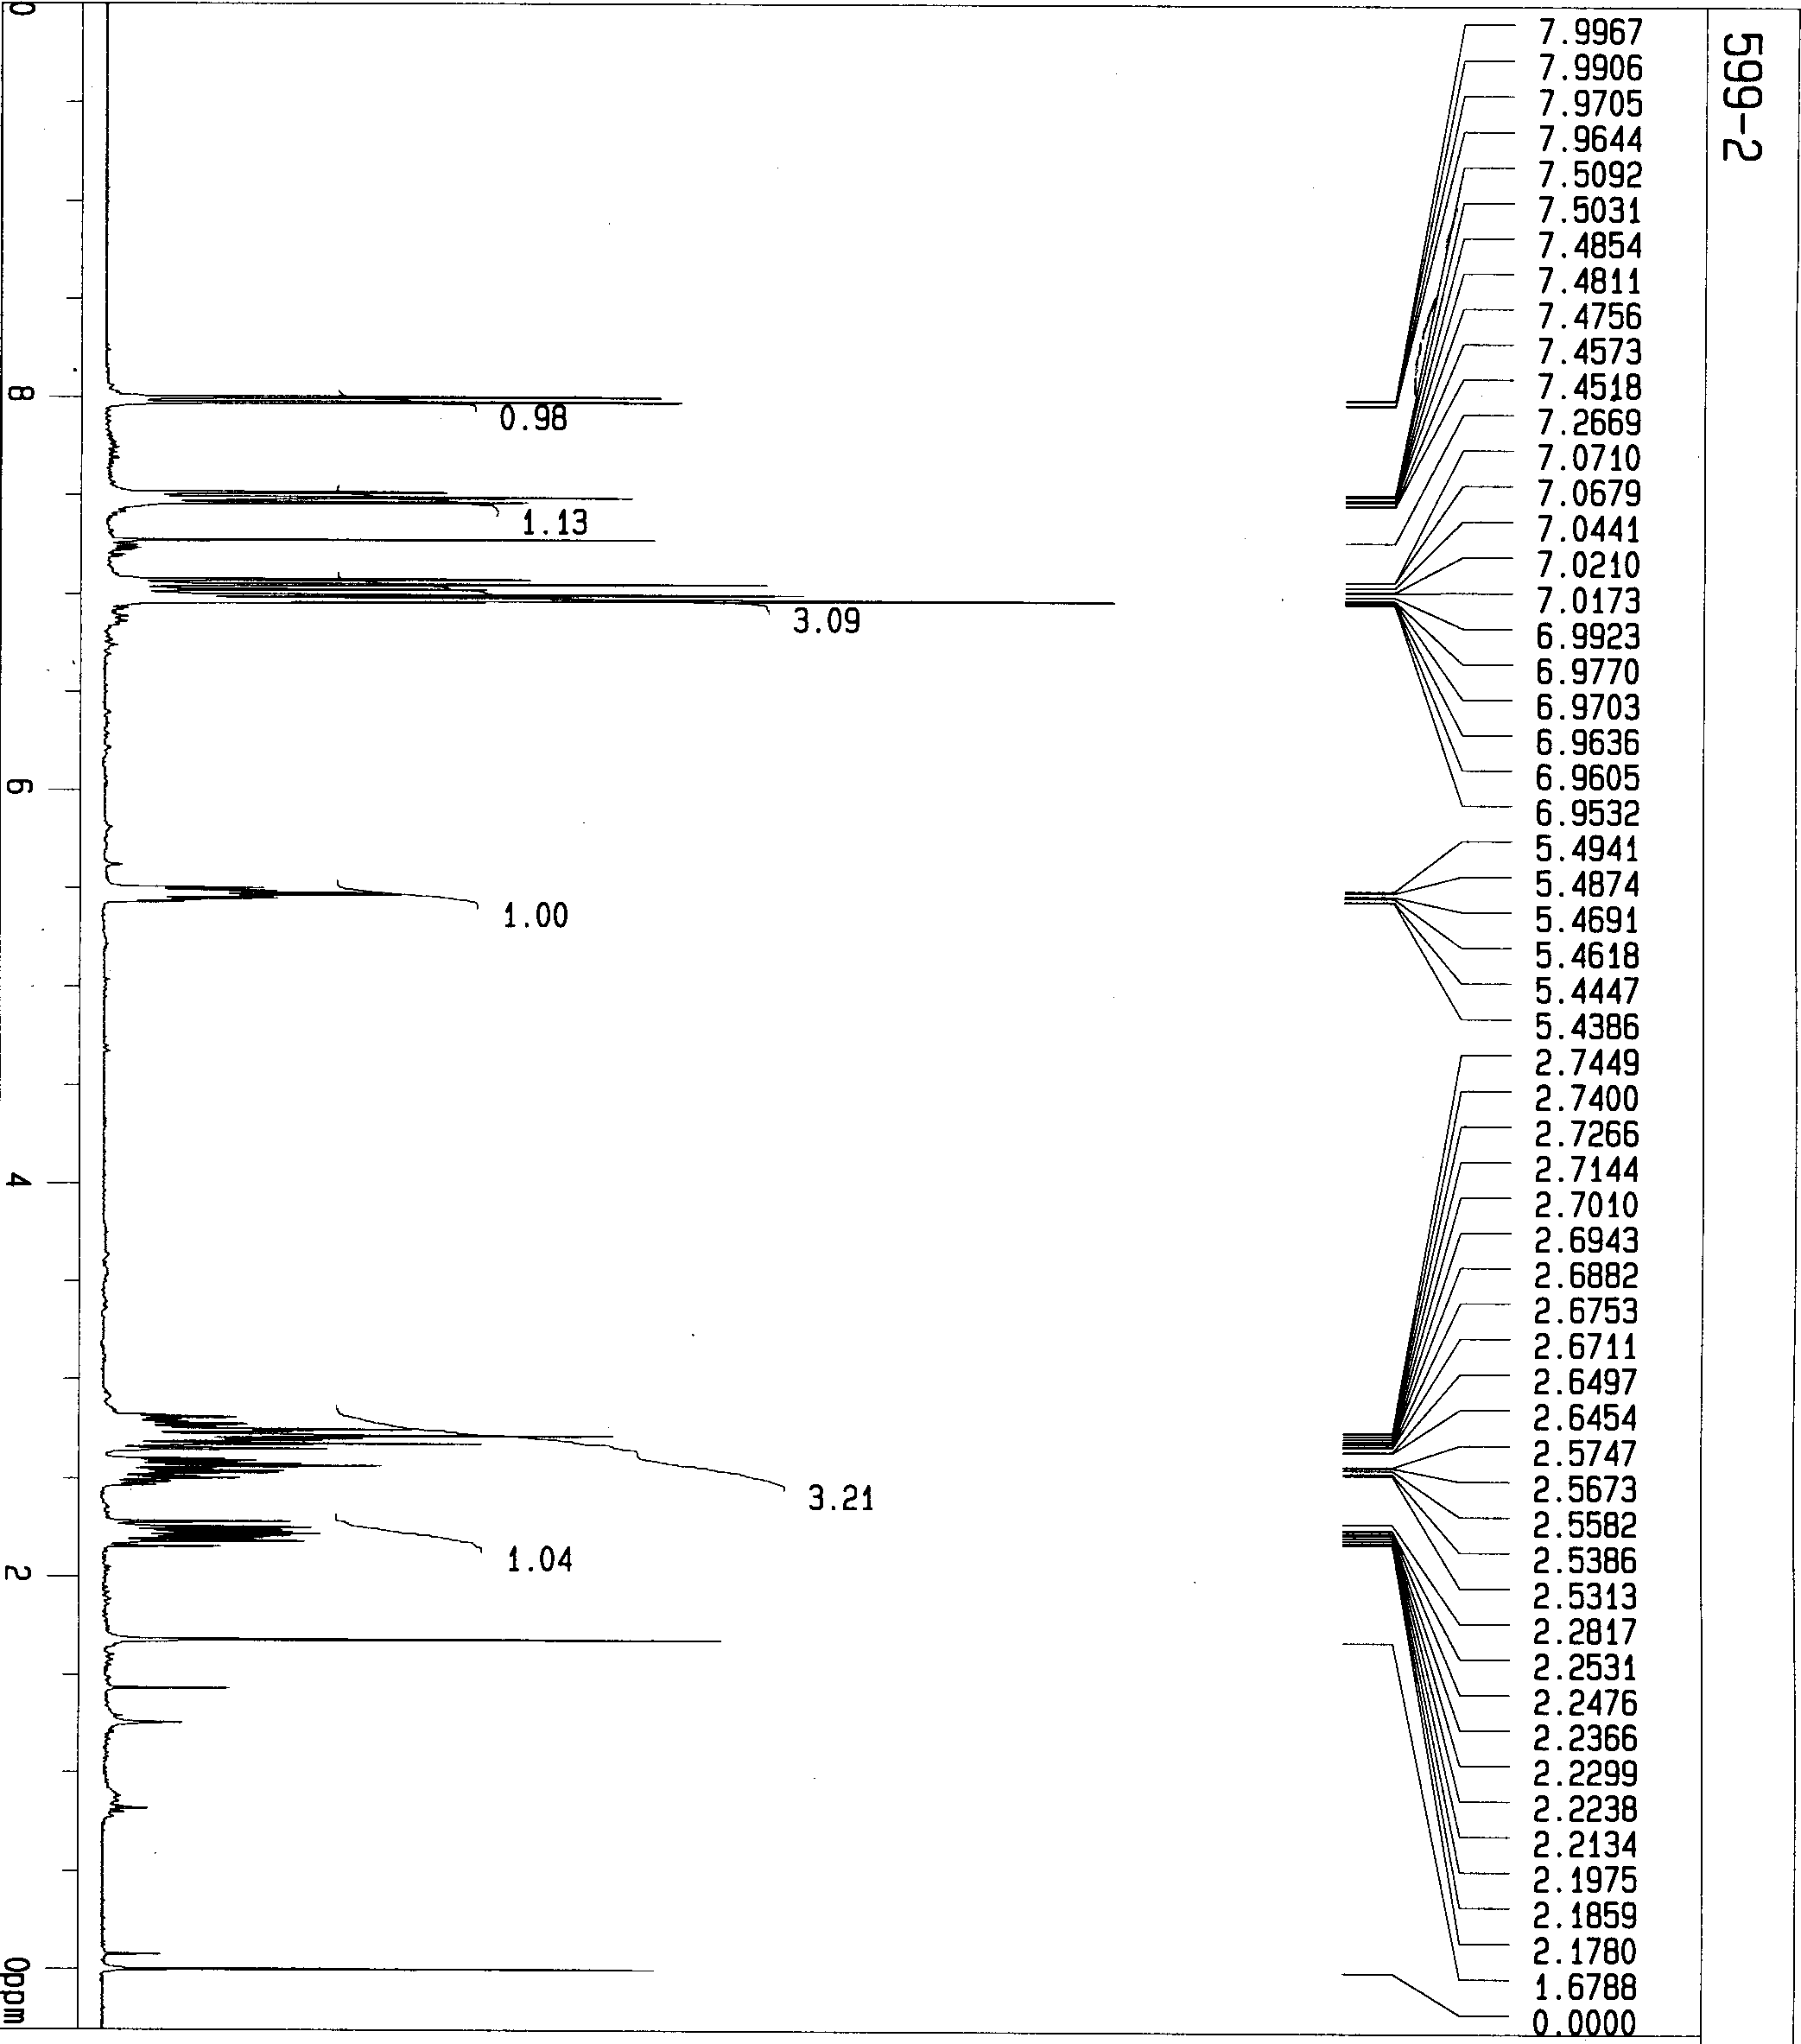


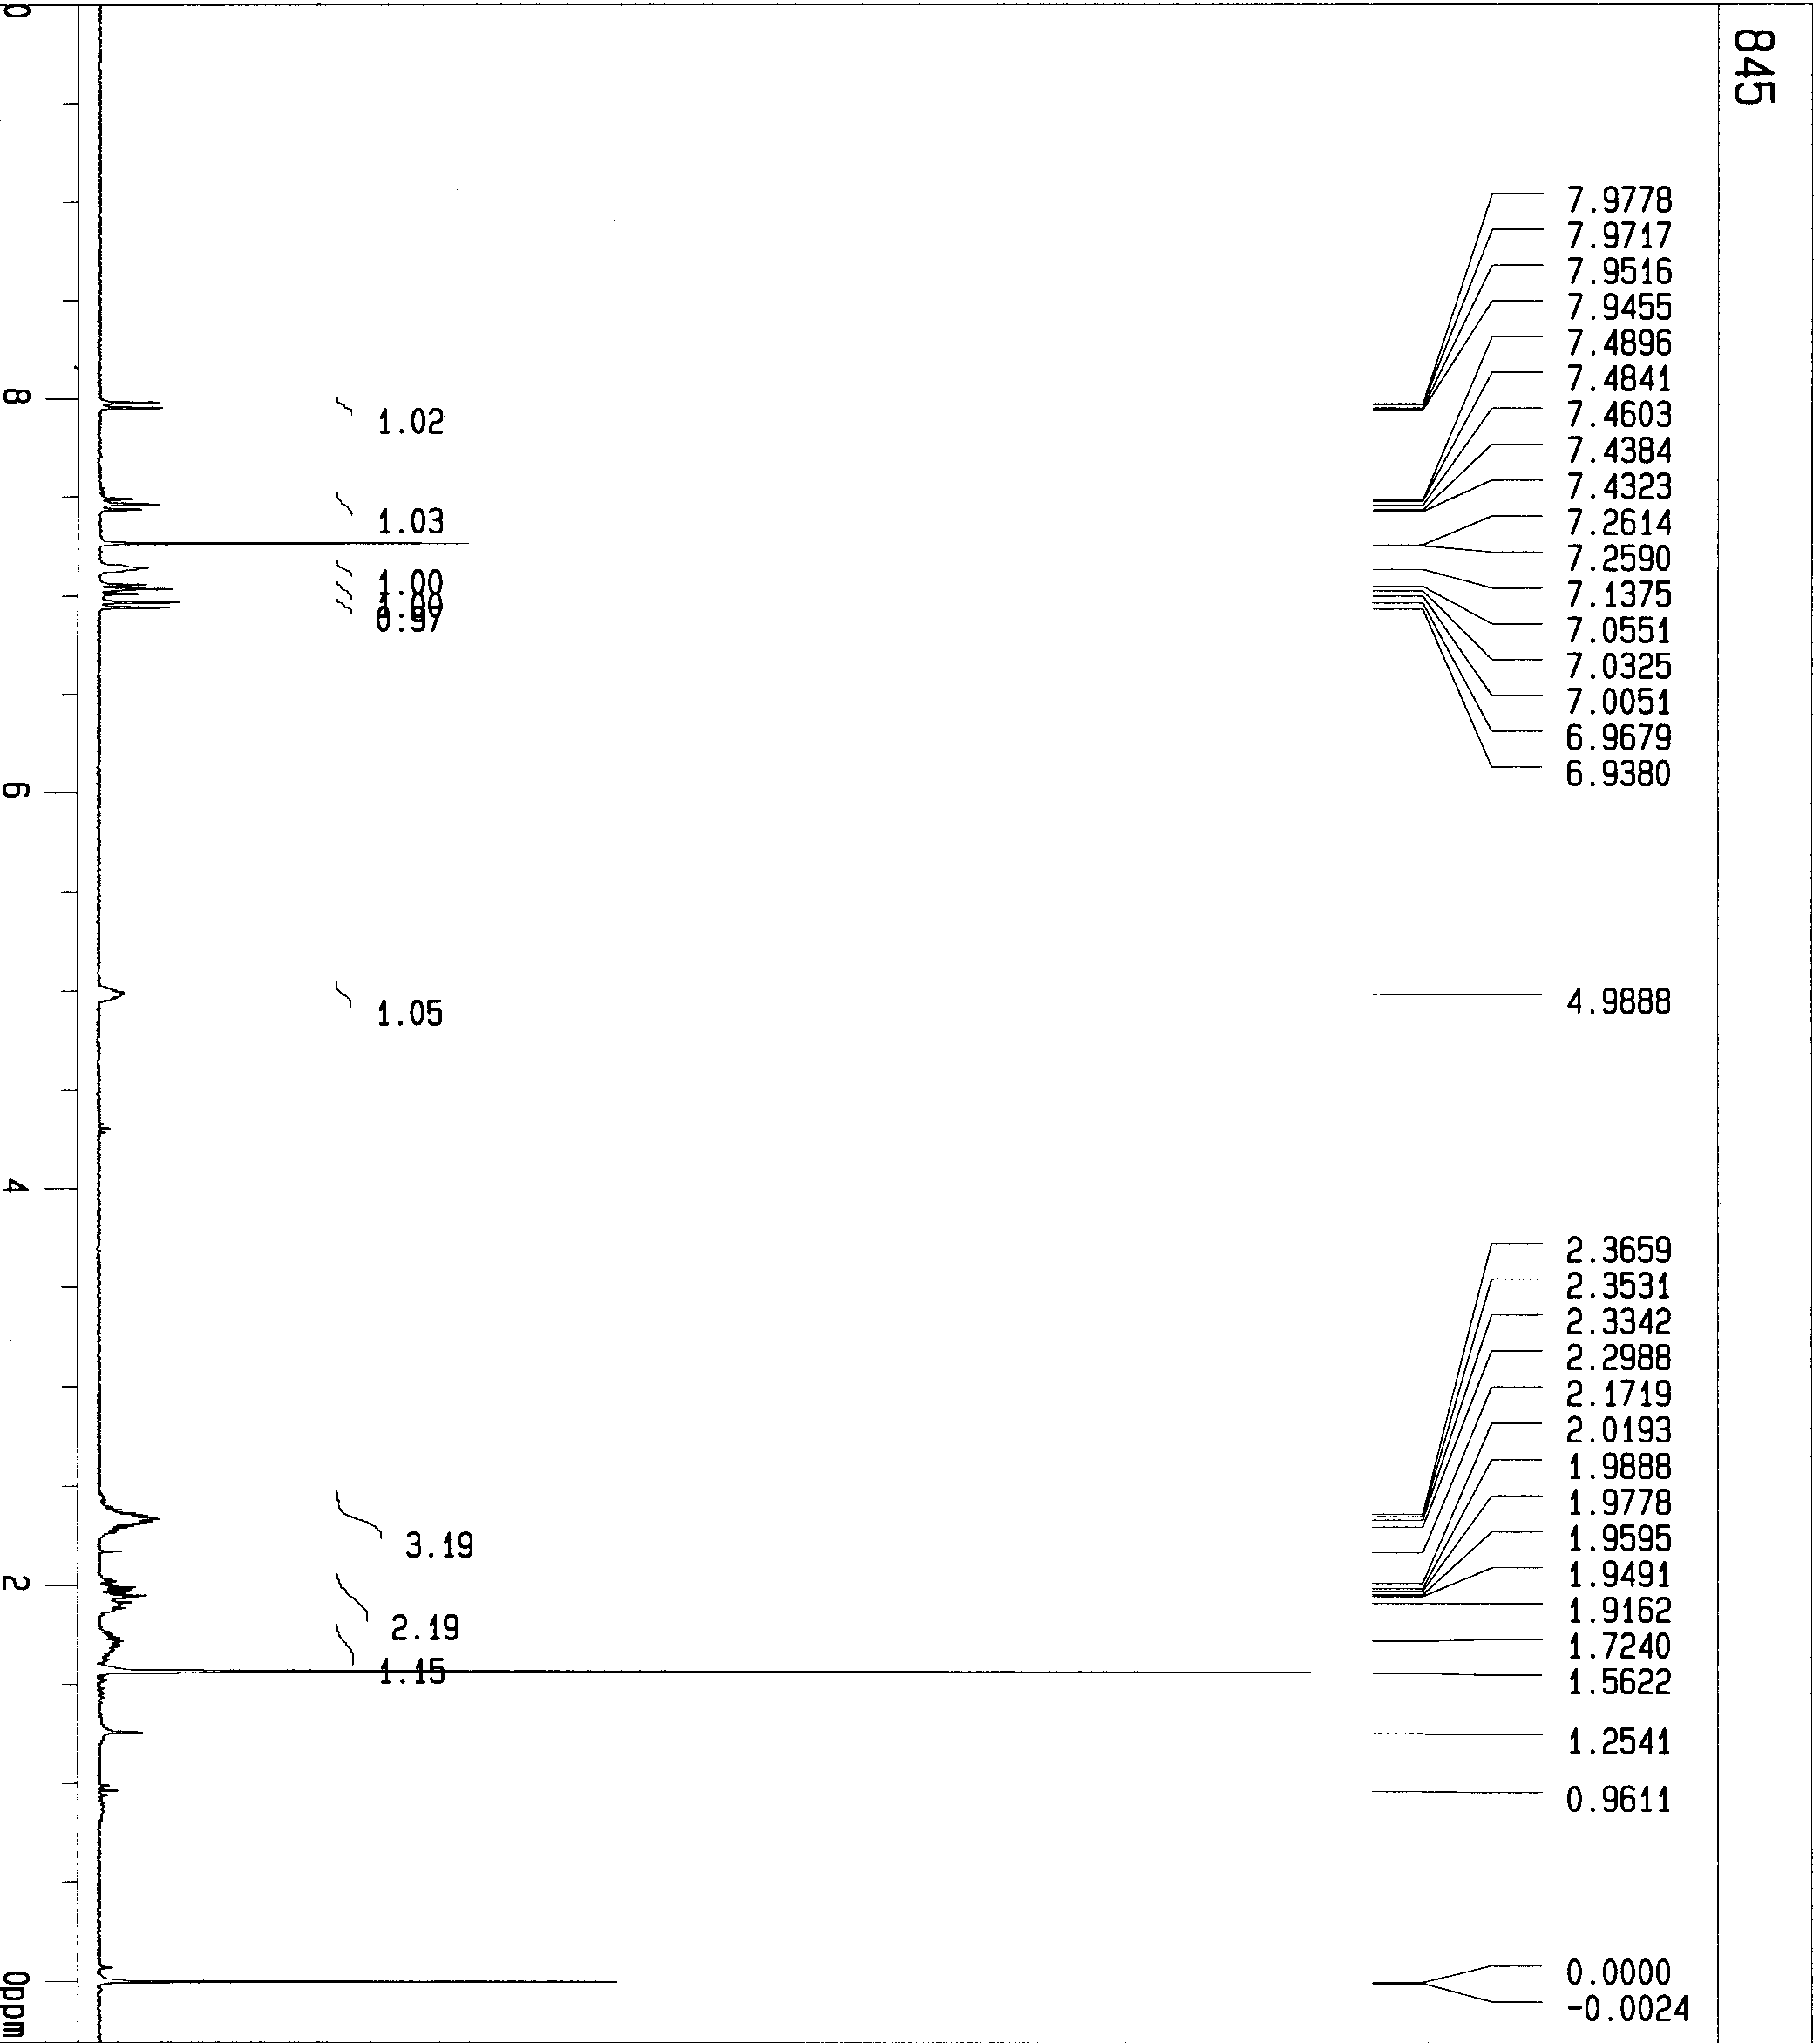


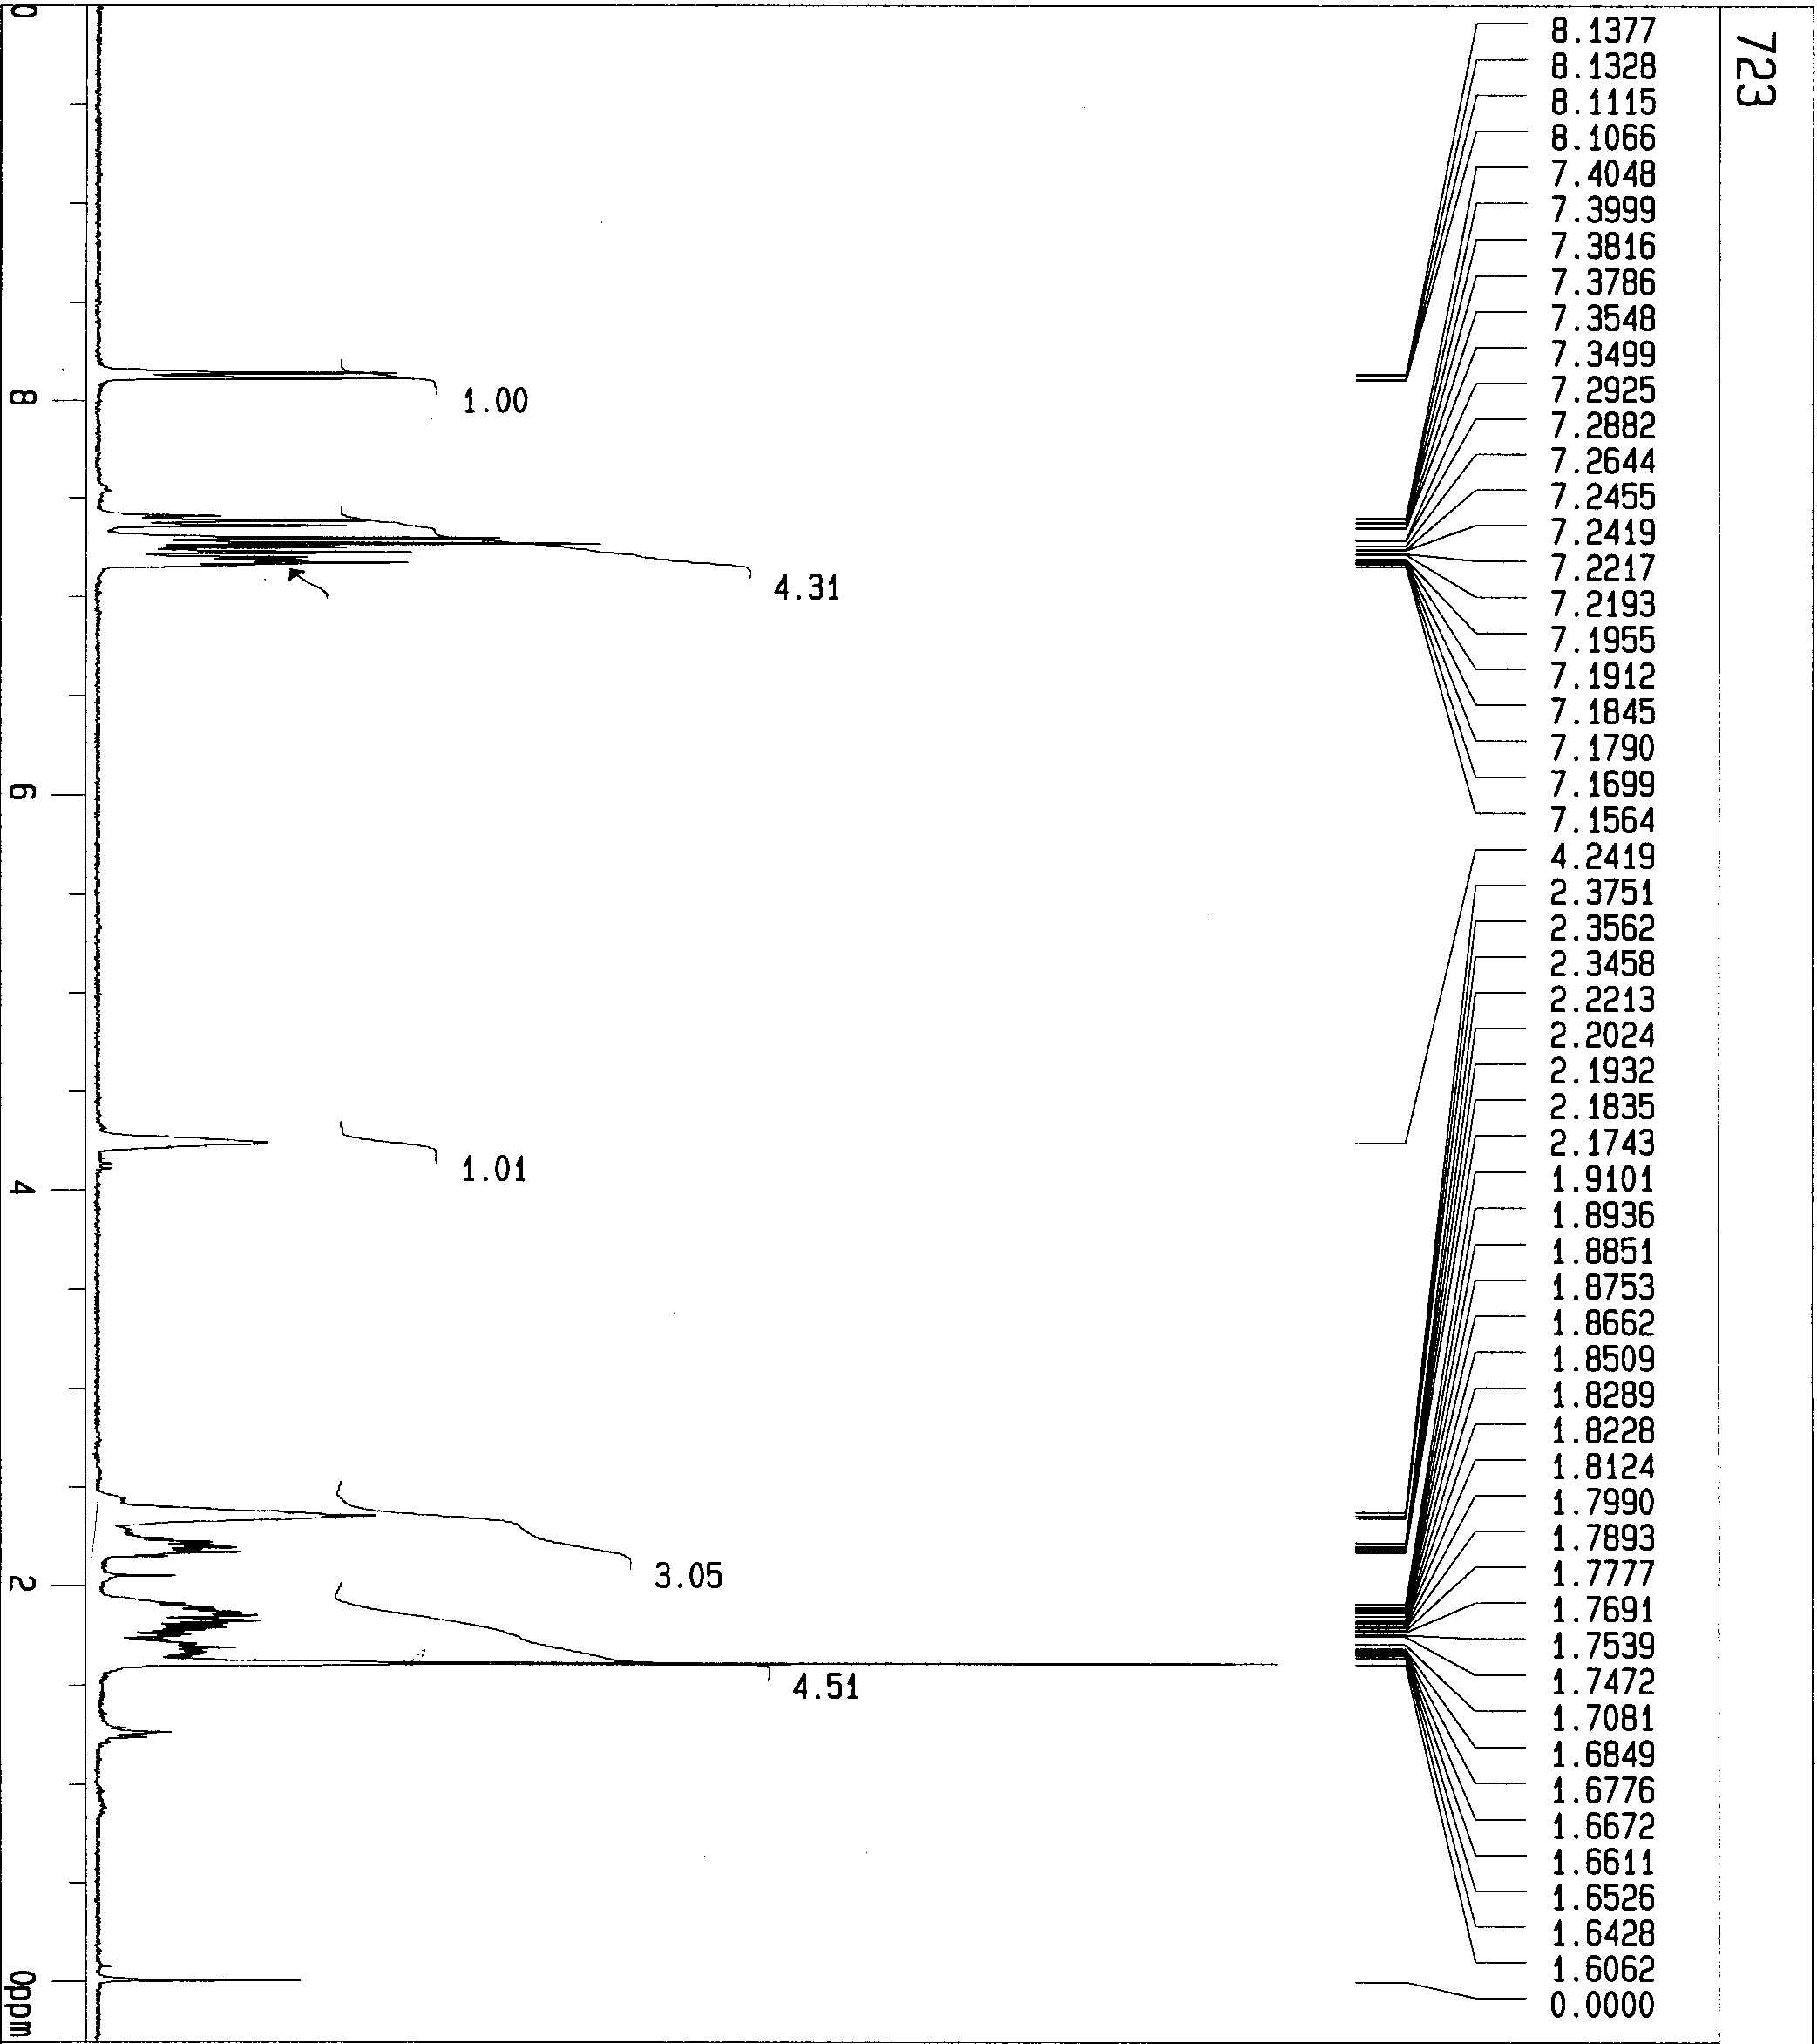


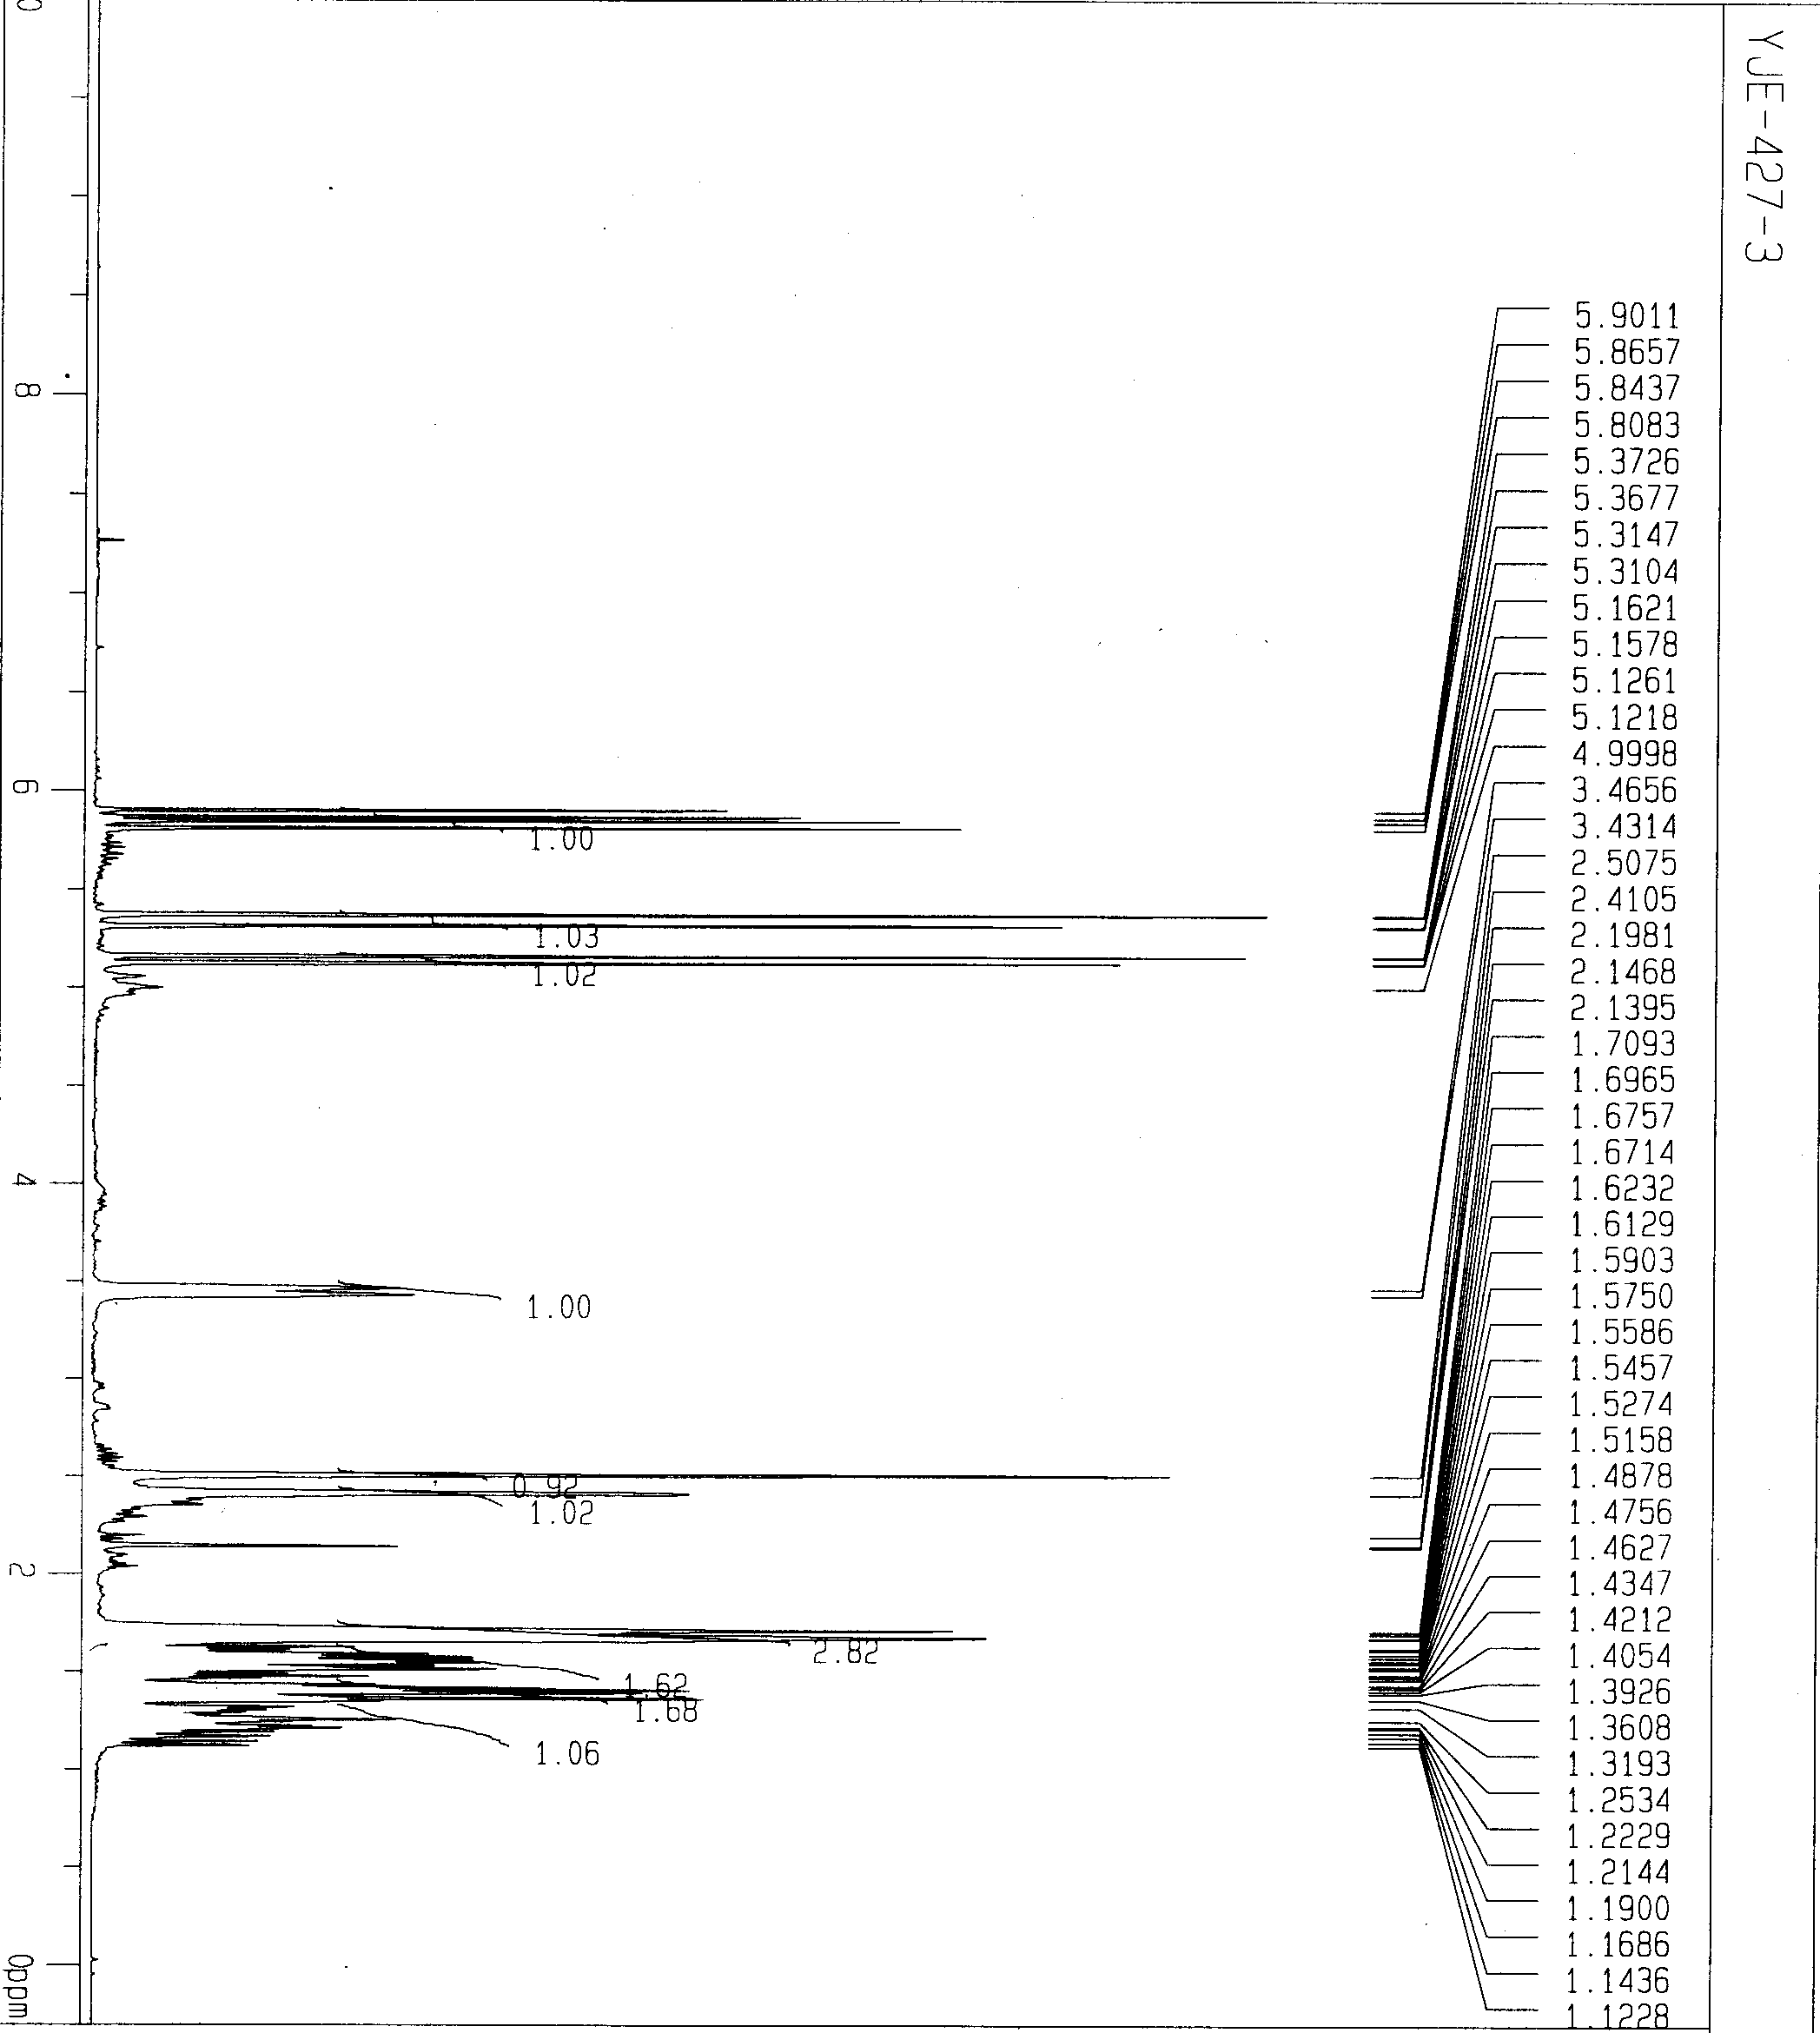


major isomer


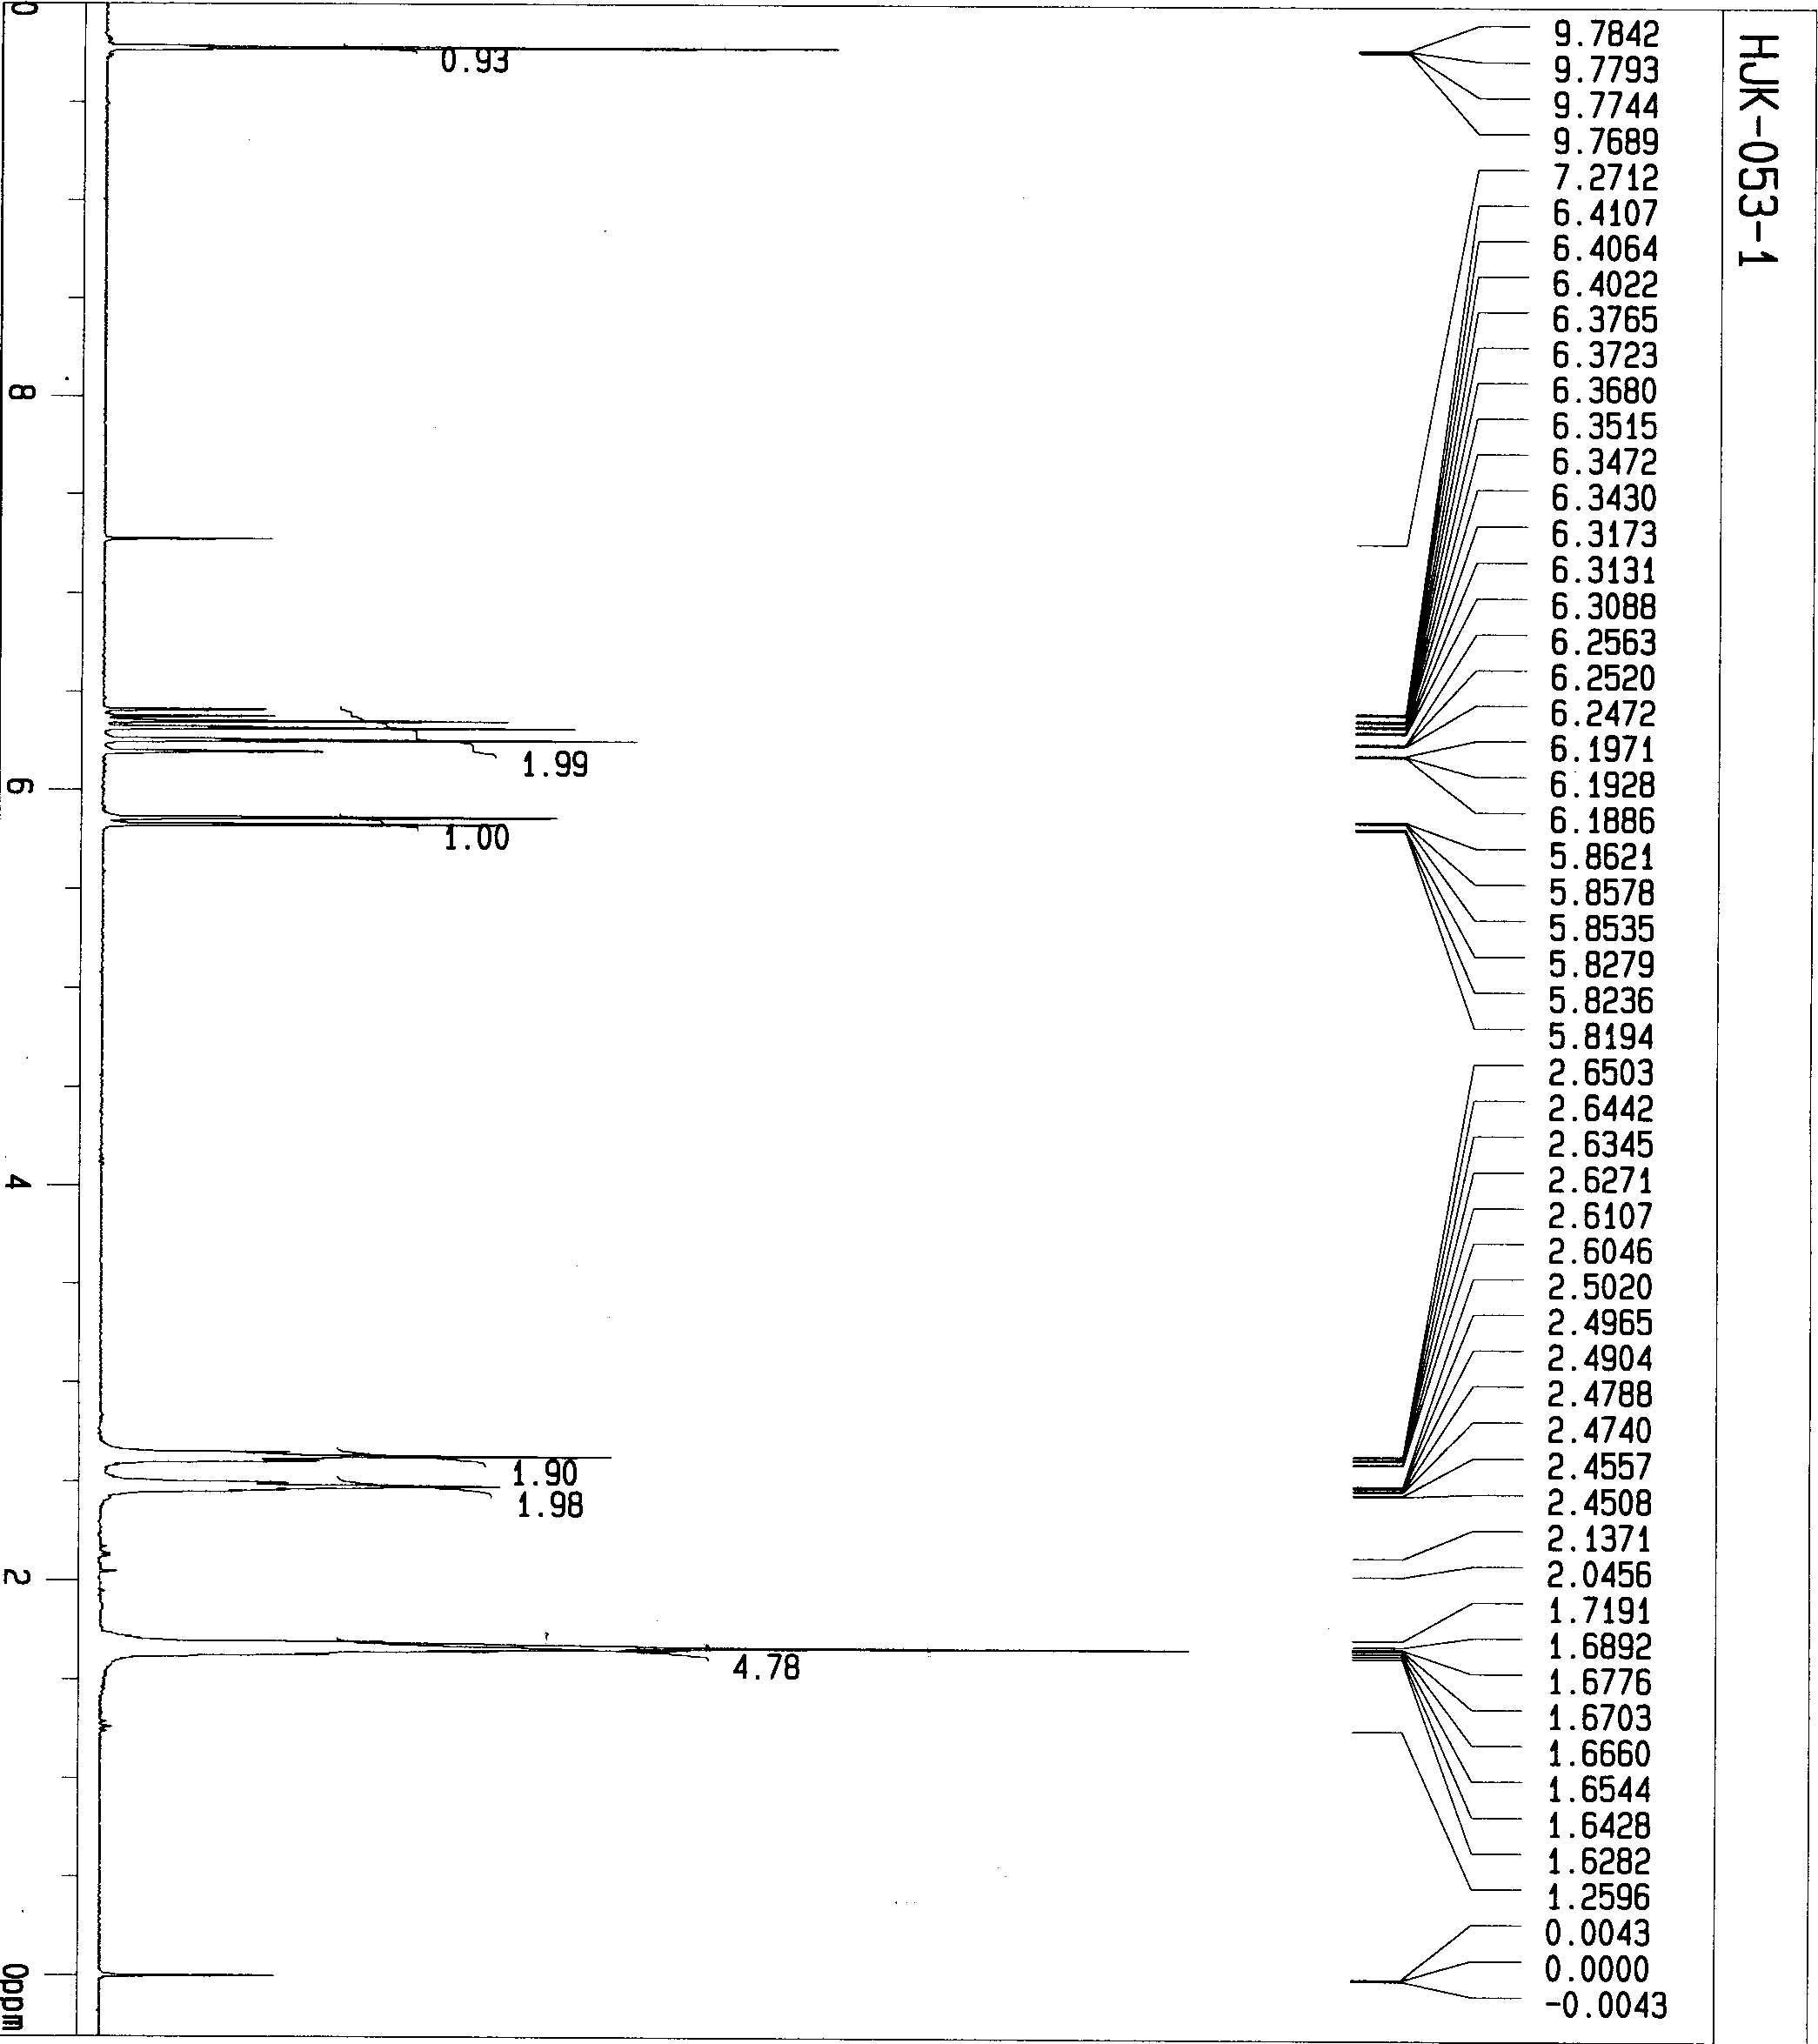


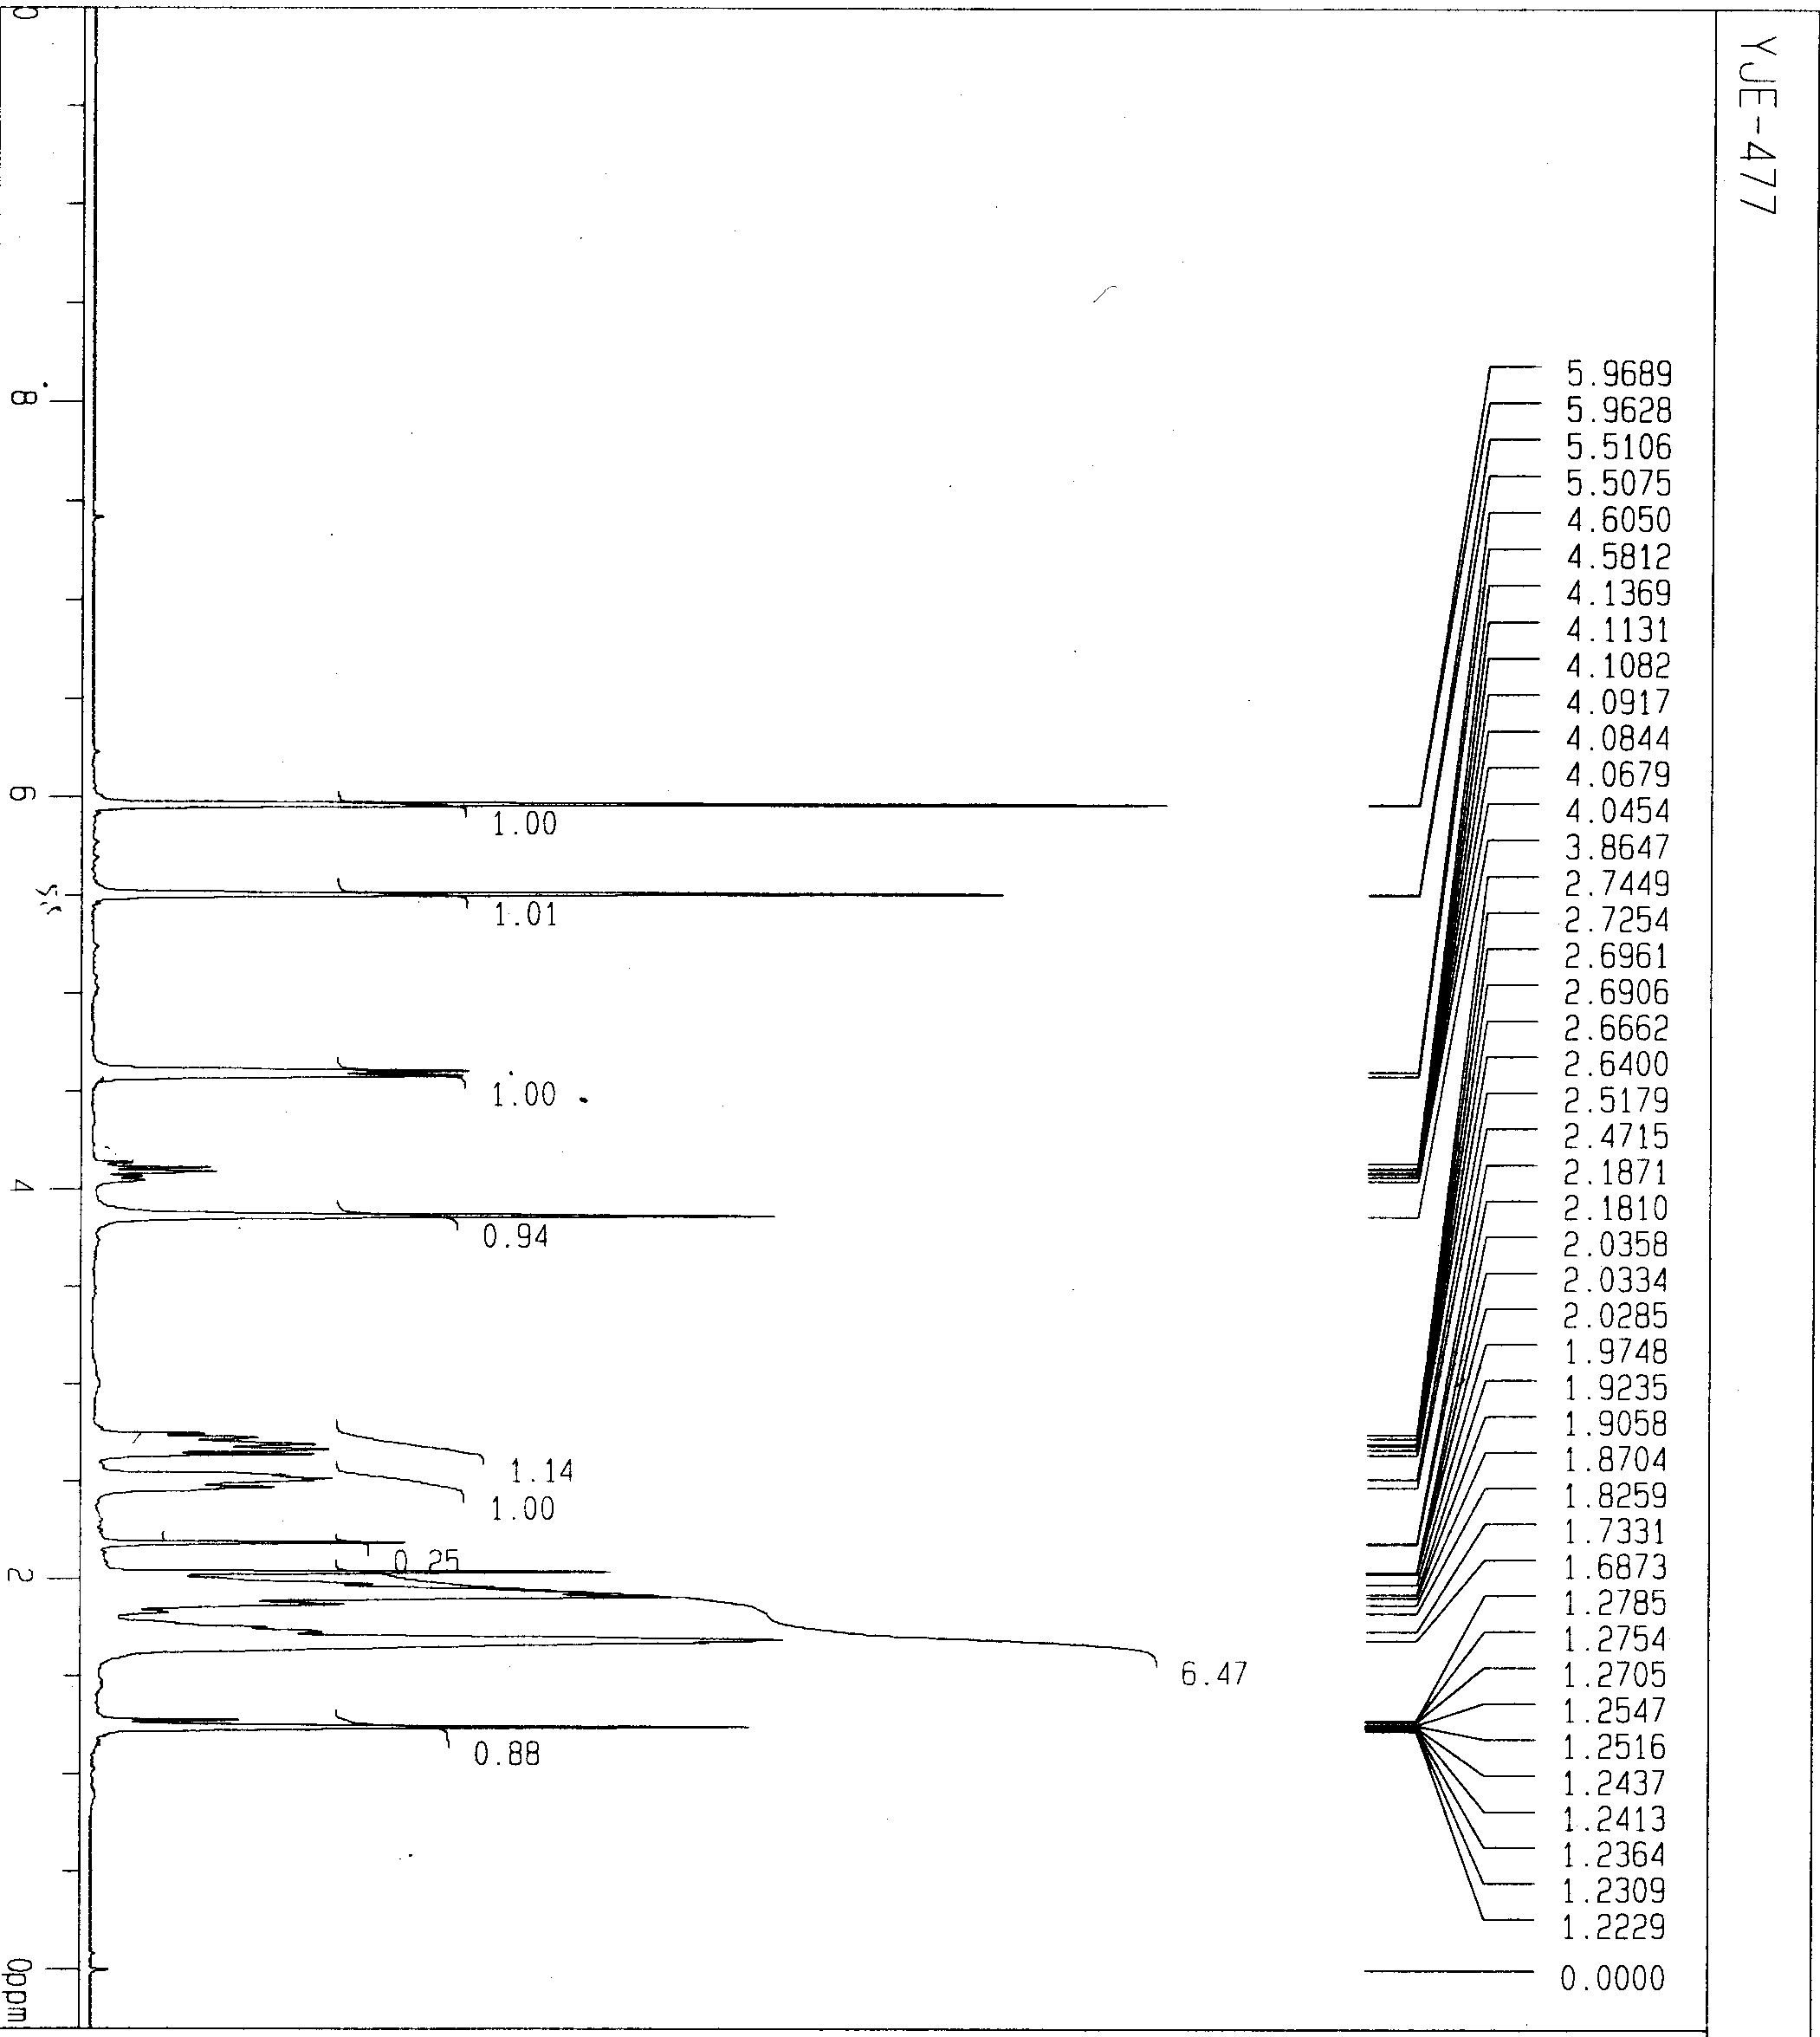

Supplement: b311951c.doc [file b311951c.doc]
